1  
2  
3  
4  
5  
6  
7  
8  
9  
10  
11  
12  
13  
14  
15  
16  
17

**Full title: The voltage sensing phosphatase (VSP) localizes to the apical membrane of kidney tubule epithelial cells**

**Short title: XI-VSP localization in kidney tubules**

Wil Ratzan<sup>1</sup>, Vamseedhar Rayaprolu<sup>1</sup>, Scott E. Killian<sup>1</sup>, Roger Bradley<sup>1</sup>, and Susy C. Kohout<sup>1</sup>

Corresponding author: Susy C. Kohout ([skohout@montana.edu](mailto:skohout@montana.edu))

<sup>1</sup>Department of Cell Biology and Neuroscience, Montana State University, Bozeman, MT, USA

# Abstract

Voltage-sensing phosphatases (VSPs) are transmembrane proteins that couple changes in membrane potential to hydrolysis of inositol signaling lipids. VSPs catalyze the dephosphorylation of phosphatidylinositol phosphates (PIPs) that regulate diverse aspects of cell membrane physiology including cell division, growth and migration. VSPs are highly conserved among chordates, and their RNA transcripts have been detected in the adult and embryonic stages of frogs, fish, chickens, mice and humans. However, the subcellular localization and biological function of VSP remains unknown. Using reverse transcriptase-PCR (RT-PCR), we show that both *Xenopus laevis* VSP (XI-VSP1 and XI-VSP2) mRNAs are expressed in early embryos, suggesting that both XI-VSPs are involved in early tadpole development. To understand which embryonic tissues express XI-VSP mRNA, we used *in situ* hybridization (ISH) and found XI-VSP mRNA in both the brain and kidney of NF stage 32-36 embryos. By Western blot analysis with a VSP antibody, we show increasing levels of XI-VSP protein in the developing embryo, and by immunohistochemistry (IHC), we demonstrate that XI-VSP protein is specifically localized to the apical membrane of both embryonic and adult kidney tubules. We further characterized the catalytic activity of both XI-VSP homologs and found that while XI-VSP1 catalyzes 3- and 5-phosphate removal, XI-VSP2 is a less efficient 3-phosphatase with different substrate specificity. Our results suggest that XI-VSP1 and XI-VSP2 serve different functional roles and that VSPs are an integral component of voltage-dependent PIP signaling pathways during vertebrate kidney tubule development and function.

# Introduction

Phosphatidylinositol phosphates (PIPs) are lipid second messengers involved in almost all facets of cell biology, including differentiation, proliferation, migration, and polarity (1,2). Many human diseases are linked to mutations in PIP-modifying enzymes, including cancer, peripheral neuropathy, stroke, bipolar disorder, autism and developmental disorders (3–6). As a result, PIP kinases and

phosphatases have been extensively studied to understand their roles in these diverse cellular processes and are increasingly viewed as potential therapeutic targets (7–9). Here, we focus on an exceptional member of the PIP-modifying family of enzymes, the voltage-sensing phosphatase (VSP).

VSP is a unique PIP-modifying enzyme whose activity is regulated through a voltage sensing domain (VSD) (10). VSDs are composed of four transmembrane helices with the fourth helix (called S4) containing arginines responsible for sensing changes in the electrical membrane potential. In response to membrane depolarizations, the S4 helix changes conformation leading to activation of the cytosolic phosphatase domain (PD), which is homologous to PTEN (phosphatase and tensin homolog deleted on chromosome 10) (10), a well characterized lipid phosphatase. Once VSP is activated, its PD dephosphorylates both the 5- and 3-phosphates from PIPs (10–14). As a result, VSPs provide a direct connection between the electrical signaling and PIP signaling pathways. While electrical signaling pathways are most often discussed in terms of neurons, all cells maintain an ionic gradient that creates a membrane potential. This electrochemical force is utilized to initiate essential cell-signaling functions. For example, pancreatic beta cells use their membrane potential to respond to increasing glucose concentrations by activating ATP-sensitive potassium channels and voltage-gated calcium channels to release insulin (15). Renal tubules also use membrane potentials, specifically activating different potassium channels for regulating cell volume, potassium secretion and tubuloglomerular feedback (16). Since many ion channels are regulated by PIPs (17–19), VSPs are likely to play a role in modulating ion channel permeability and their subsequent electrical signaling when channels and VSP are co-expressed.

In line with the idea that VSP serves a fundamental physiological role, VSP orthologs have been identified in several tissues across diverse phyla, including ascidians, newts, salamanders, zebrafish, chicken, amphibians, mice, and humans (10,11,20–26). In particular, VSP mRNA transcripts have been found in the adult nervous systems of sea squirts and the brains of frogs, mice and humans (20,22,27,28) as well as in kidney, stomach, heart, testis and ovary (20,22–25,27–30). In addition to adult tissues, VSP transcripts have been detected in embryonic tissues such as the kidney and eye of

zebrafish (31), the kidney, brain and stomach of chicks (21,30), and the brain, spinal cord and eye of mice (25,27,32). The majority of studies investigating VSP localization focused on measuring mRNA expression, with a few studies reporting cellular localization of VSP protein. The first report of the sea squirt VSP (*Ciona intestinalis* VSP, Ci-VSP) found protein expression in sperm tails (10). In chicks, *Gallus gallus* VSP (Gg-VSP) protein was found in Purkinje neurons throughout the cell, which the authors suggested means Gg-VSP is expressed on the plasma membrane as well as intracellular membranes (30). Lastly, mouse VSP (Mm-VSP) was found in the brains of adult and neonatal mice, specifically in dissociated cortical neurons (32). However, to our knowledge, a connection between VSP activity and PIP-mediated biological processes in native tissues remains unknown.

To better understand VSP's biological role, we tested for XI-VSP localization in *Xenopus laevis* embryos. *X. laevis* are an allotetraploid species and have two highly similar VSP proteins, termed XI-VSP1 and XI-VSP2 (22,33). We found the RNA transcripts for both in multiple stages of embryonic development. The transcript expression patterns differed between the two homologs, suggesting that they fulfill different biological roles. We validated a new VSP antibody, N432/21 (NeuroMab), which recognizes both XI-VSPs and shows that XI-VSP protein is expressed in the brain and kidney of adult and embryonic *X. laevis*. Furthermore, we found that XI-VSP protein is specifically located on the apical membrane of both embryonic and adult kidney tubules. To probe the function of XI-VSP in these tubules, we tested the catalytic activity of both XI-VSP homologs. We found that they dephosphorylate the 5-phosphate from PIPs, but unlike other VSPs, XI-VSP2 is a significantly weaker 3-phosphatase. From our results, we suggest that by dephosphorylating PIPs in a voltage-dependent manner, XI-VSPs play a fundamental role in kidney development and function.

## Results

### XI-VSP mRNA transcripts in *X. laevis* embryos

The location and function of a biological molecule are often tightly coupled characteristics. Our previous publication showed adult *X. laevis* transcript expression in several tissues including testes, kidney, ovary, liver, and brain (22). Although previous studies found VSP transcripts in the embryos of ascidians (28), fish (31), chicken (21,30) and mice (27), expression in *X. laevis* embryos has not been reported. To better understand XI-VSP's physiological role, we determined the RNA transcript expression of XI-VSP1 and 2 during *X. laevis* development. We made polyadenylated cDNA libraries from the total RNA from Nieuwkoop and Faber (NF) (34) stage 12-40 embryos and conducted semi-quantitative reverse transcriptase PCR (sqRT-PCR) using XI-VSP1 and XI-VSP2 specific PCR primers. We found that both XI-VSP1 and 2 transcripts are expressed in the developing embryo and accumulate by swimming tadpole stages (NF stages >36; Fig 1A-B). Furthermore, we observed a high level of XI-VSP1 transcripts in early embryos, which are likely remnants of maternal transcripts in agreement with our previous finding of high level expression of XI-VSP1 in the ovary (Fig 1A) (22). Our results indicate that both XI-VSP1 and XI-VSP2 transcripts are present at early stages of *X. laevis* development and that the two show different patterns of embryonic RNA expression. These results agree with our previous finding that the transcripts are differentially expressed in adult tissues (22) and further suggest discrete functional roles for each in developing embryos.

**Fig 1. *X. laevis* embryonic stages show VSP mRNA transcripts expression.**

(A-B) Semi-quantitative RT-PCR (sqRT-PCR) of a panel of *X. laevis* embryos (NF stage 12-40) using PCR primers specific for XI-VSP1 (A) and XI-VSP2 (B). Both XI-VSP1 and XI-VSP2 transcripts appear to accumulate by stage 36. No bands were seen without reverse transcriptase (not shown). All cDNA libraries were made with equal amounts of total RNA as determined by spectrophotometry and confirmed by agarose gel electrophoresis to visualize ribosomal RNA bands (S1 Fig). sqRT-PCR was repeated at least two times with at least two different embryonic cohorts. The expected PCR amplicon sizes are 389 bp for XI-VSP1 and 478 bp for XI-VSP2. Shown are representative gels.

We next localized XI-VSP mRNA in embryos by *in situ* hybridization (ISH). We tested NF stage 32-36 *X. laevis* embryos by ISH with an antisense-stand probe against full-length XI-VSP1 mRNA since our sqRT-PCR analysis showed accumulation of mRNA expression at those stages. In agreement with our sqRT-PCR results, we found RNA transcripts in the developing pronephros, brain and brachial arches (Fig 2A), whereas no staining was seen when using a sense-strand control probe (Fig 2B). Since XI-VSP1 and XI-VSP2 mRNAs share 93% identity on the nucleotide level, it is possible this staining is due to transcripts from either XI-VSP1, XI-VSP2, or both.

**Fig 2. VSP mRNA is located in the pronephros and brain of *X. laevis* embryos.** (A) *In situ* hybridization (ISH) of whole-mount NF stage 32 embryos. An anti-sense probe against XI-VSPs shows XI-VSP transcript in the proximal pronephritic field (black arrowhead) and brain (white arrowhead) of the embryos. This probe cannot distinguish between XI-VSP1 and XI-VSP2 mRNAs because of the similarity between the two transcripts at the nucleotide level (93%). (B) No staining was observed by ISH in a sibling embryo with a sense control probe. ISH was repeated four times with four different embryonic cohorts. Shown are representative embryos.

## Validating a VSP antibody

To determine XI-VSP protein expression in tissues, we validated a mouse monoclonal VSP antibody, N432/21, developed by the NeuroMab facility at the University of California, Davis. We used *X. laevis* oocytes as a heterologous expression system to determine the specificity of the anti-VSP. Oocytes were injected with 20 ng of VSP RNAs from different species, incubated for 36 hours before being lysed, and the lysates were run on SDS-PAGE gels for Western blotting. The anti-VSP N432/21 recognized several species of VSP, including XI-VSP1 (58 kDa), XI-VSP2 (58 kDa), *Xenopus tropicalis* VSP (Xt-VSP, 58 kDa), FLAG-tagged *Ciona intestinalis* VSP (Ci-VSP, 66 kDa), and *Danio rerio* VSP (Dr-VSP, 58 kDa) (Fig 3A). XI-VSPs heterologously-expressed in *X. laevis* oocytes often displayed a double band at their predicted weight (58 kD), with the XI-VSP2 migrating slightly slower through the

gel than XI-VSP1 and Xt-VSP (Fig 3A-C). The nature of these doublets and the slight difference in electrophoretic mobility between XI-VSP1, XI-VSP2, Xt-VSP, and Dr-VSP (despite their nearly identical predicted MWs) is not presently understood. These results demonstrate that anti-VSP N432/21 recognizes both XI-VSP1 and 2 proteins, as well as the most commonly-studied VSP (Ci-VSP) and VSPs from two other common vertebrate models of development.

**Fig 3. *X. laevis* tissues and embryos show VSP protein expression.** (A) Western blot validation of N432/21 anti-VSP in *X. laevis* oocytes injected with RNA for Dr-VSP (Dr), FLAG-Ci-VSP (Ci), XI-VSP1 (XI1), XI-VSP2 (XI2), Xt-VSP (Xt), or left un-injected (U). All VSPs tested were recognized by the antibody. Un-injected oocytes (U) display no band. Dr-VSP, XI-VSP1, XI-VSP2 and Xt-VSP have a predicted MW of 58 kD while FLAG-Ci-VSP has a predicted MW of 66 kD. The slight difference in electrophoretic mobility between VSPs and their predicted MWs and the nature of the double band for XI-VSP1 and XI-VSP2 (as seen in panels B and C) has not been determined. These results show that anti-VSP N432/21 is specific for VSP and cross-reacts with VSPs from multiple species. (B) Western blot analysis of *X. laevis* tissues. Lysates from adult kidney (K, 3 µg), testis (T, 30 µg), brain (B, 10 µg), and stage 44 embryo (E, 20 µg) were run against lysates from oocytes injected with RNAs for XI-VSP1 (XI1), XI-VSP2 (XI2) or left un-injected (U) and analyzed by Western blot with anti-VSP. A single band of approximately the correct MW (58 kD) was observed in the tissue lysates, indicating the presence of XI-VSP protein in all tissues tested. (C-D) Western blot analysis of *X. laevis* embryos. Lysates from NF stage 12-40 embryos (30 µg each) were run against lysates from adult kidney (K, 5 µg) and oocytes injected with RNAs for XI-VSP1 (XI1), XI-VSP2 (XI2) or left un-injected (U). Blots were probed either with anti-VSP (C) or anti-actin (D) as a loading control (predicted MW 42 kD). A weak band (potentially corresponding to XI-VSP1) is present only at early embryonic stages 12-20 (red arrowheads), whereas a slightly slower-migrating band (potentially corresponding to XI-VSP2) accumulates at later embryonic stages 36-40. Lysates, gels and blots were repeated three times with either three different adults or three different embryonic cohorts. Shown are representative gels for each.

## Western blots of XI-VSP protein in embryos and adult tissues

After validating the VSP antibody, we turned to tissue samples from adult and embryonic *X. laevis*. Lysates made from adult kidney, testis, brain, and NF stage 44 embryos show a single band of the correct approximate MW (58 kD) by Western blot, indicating that these tissues express XI-VSPs (Fig 3B). The anti-VSP N432/21 recognizes both XI-VSP1 and 2 so we cannot definitively distinguish whether XI-VSP1, XI-VSP2, or both are present. However, their slight difference in electrophoretic mobility makes it possible to infer that XI-VSP2 is predominantly expressed in the kidney while XI-VSP1 expression may predominate in the testes, further supporting the likelihood of different roles for the two XI-VSP proteins.

Next, we tested for XI-VSP protein expression in *X. laevis* embryos, NF stages 12-40. Western blots show a faint band at the early embryonic stages, NF 12-20, and darker bands at the later swimming tadpole stages, NF 36-40 (Fig 3C). Based on the slight electrophoretic differences observed in the heterologous system, the slightly lower apparent MW faint bands may represent XI-VSP1. The darker bands have a slightly higher apparent MW, suggesting they represent XI-VSP2. Interestingly, these results suggest that XI-VSP2 is up-regulated as the tadpole develops. This pattern of XI-VSP protein levels agrees with the high level of XI-VSP1 maternal transcripts in the ovary (22) and up-regulation of XI-VSP2 RNA during later developmental stages (Fig 1B). Furthermore, from these blots, we suggest post-transcriptional regulation of XI-VSP protein expression in the developing embryo since XI-VSP1 transcripts also are present in later embryonic stages yet are not detectable by Western blot (Fig 3C). Overall, XI-VSP protein is present in both adult and embryonic *X. laevis*. The differential protein expression between XI-VSP1 and XI-VSP2 is consistent with the differences observed at the RNA level and further suggests the two homologs serve different functional roles.

## Immunohistochemistry of XI-VSP proteins in kidney and brain



Since protein accumulation was not detected by immunoblotting until later embryonic stages, we next used whole-mount indirect IHC on NF stage 42 embryos. Because we observed high RNA and protein levels in the kidneys, we initially focused on kidney expression for the IHC experiments. To facilitate kidney identification, we used two transgenic lines that express GFP in the developing kidney, either Pax8:GFP (35) or Cdh17:GFP (36). Whole-mount immunostained Pax8:GFP embryos showed distinct XI-VSP staining in the proximal pronephros, indicating XI-VSP protein is present during kidney development (S2 Fig A-C, A'-C'). This staining was not seen in sibling embryos stained with the secondary antibody alone (S2 Fig A''-C''). Focusing on the pronephritic tubules, we fixed, embedded, and sectioned NF stage 42 Cdh17:GFP embryos for IHC to determine subcellular localization of XI-VSPs (Fig 4A-F). Interestingly, we observed XI-VSP staining in the developing pronephritic tubules, specifically localized to the luminal surface or apical membrane of the tubules (Fig 4A). This is in contrast to the soluble GFP marker that is visible throughout the tubules (Fig 4B). Consecutive sections probed with the secondary antibody alone show the GFP marker without any XI-VSP staining (Fig 4A'-F'). We also examined embryos for XI-VSP protein in brain tissue, given the presence of XI-VSP RNA transcripts in embryonic brain (Fig 2A). However, we did not observe any XI-VSP staining in the developing brain, either in whole-mount or in sections (data not shown). This may be due to XI-VSP protein levels being too low to visualize via our IHC methods, or due to masking of the epitope during fixation by XI-VSP binding partners (see discussion). Further studies involving IHC signal amplification and/or antigen retrieval may be needed to distinguish between these possibilities and to localize XI-VSP protein in the *X. laevis* brain. Our findings demonstrate embryonic expression of XI-VSP protein in pronephritic tubules with subcellular localization on their apical membranes, thus, suggesting XI-VSPs play an important role in the development and function of the embryonic *X. laevis* kidney.

**Fig 4. XI-VSP protein is expressed on the luminal surface of embryonic pronephroi.** NF stage 42 Cdh17:GFP *X. laevis* embryos were sectioned and stained to test for VSP protein. Kidney tubules were identified by the presence of the Cdh17:GFP transgene (B, B'). Sections stained with anti-VSP (A)

showed fluorescence on the luminal surface (corresponding to the apical membrane) of the proximal kidney tubule cells (outlined in white). Anti-VSP staining was only observed in the presence of anti-VSP (A-F) and not in secondary antibody alone control sections (A'-F'). Panels (A, A') anti-VSP or no anti-VSP control; (B, B') GFP transgene; (C, C') fluorescence signal overlay of A, B and E; (D, D') bright field images; (E, E') Hoechst 33342 (to mark nuclei); (F, F') signal overlay of A, B, D and E. IHC was repeated three times with three different embryonic cohorts. Shown are representative sections. Scale bar = 25  $\mu$ m

In addition to embryos, we also tested adult kidney tissue using IHC. Adult male *X. laevis* kidneys were removed, fixed, embedded, sectioned, and stained with anti-VSP. The sections also show XI-VSP staining on the luminal surface of the tubules (Fig 5A), which is consistent with the subcellular staining observed in embryonic kidney tubules (Fig 4A). No staining was seen in adult kidney tubules when consecutive sections were probed with secondary antibody alone (Fig 5B). In contrast to our IHC of embryonic kidney sections, we only observed staining in adult kidney sections by anti-VSP after post-fixation antigen retrieval, which suggests a difference in the availability of the VSP antigen in embryonic versus adult kidney tissues. These results suggest a long-term functional role for XI-VSPs in the kidney since they are present from the earliest stages of kidney development and continue into adulthood.

# **Fig 5. XI-VSP protein is expressed on the luminal surface of adult kidney tubule epithelial cells.**

(A) Adult kidney sections were stained with anti-VSP and anti-mouse IgG-Alexa 488. XI-VSP staining is observed on the luminal surface (marked with arrowheads) of the kidney tubules (two outlined in white). This surface corresponds to the apical membrane and not the basolateral membrane of the epithelial cells. (B) Apical membrane staining was not seen on a consecutive section in the absence of anti-VSP primary antibody. IHC was repeated on sections from kidneys of three different adult males. Shown are representative sections. Scale bar = 25  $\mu$ m

## Functional activity of XI-VSPs

While VSPs from *Ciona intestinalis* and *Danio rerio* function as both 5- and 3-phosphatases (10–12,14,37) the XI-VSPs have previously been characterized as only a 5-phosphatase against phosphatidylinositol-4,5-bisphosphate [PI(4,5)P<sub>2</sub>] (22). To understand how the XI-VSPs may contribute to kidney function, we examined their phosphatase activity to determine whether both XI-VSP1 and 2 dephosphorylate phosphatidylinositol-3,4,5-trisphosphate [PI(3,4,5)P<sub>3</sub>] at the 5-phosphate as well as whether they function as 3-phosphatases. Because XI-VSPs are regulated by voltage, we used two electrode voltage clamp (TEVC) to control XI-VSP activation. To monitor all four possible dephosphorylation reactions (Fig 6A), we turned to pleckstrin homology (PH) domain-based optical biosensors. PH domains are well known proteins that bind specifically to certain PIPs (38–40). We chose PH domains from tandem PH domain containing protein 1 (TAPP) and phospholipase C (PLC) because they bind specifically to phosphatidylinositol-3,4-bisphosphate [PI(3,4)P<sub>2</sub>] and PI(4,5)P<sub>2</sub>, respectively, allowing us to monitor both 5- and 3-phosphatase activities (12,14,41,42). To follow PI(3,4)P<sub>2</sub>, we used the biosensor fTAPP that utilizes the PH domain from TAPP flanked by an N-terminal CFP and C-terminal YFP, while the whole sensor is anchored to the membrane through a prenylation site at the C-terminus (Fig 6B) (41–43). When VSP dephosphorylates the 5-phosphate from PI(3,4,5)P<sub>3</sub>, the TAPP-PH domain of the fTAPP biosensor will bind the PI(3,4)P<sub>2</sub> and the resulting conformational change between the CFP and YFP will change the Förster resonance energy transfer (FRET) between them, leading to an increase in the FRET ratio (Fig 6B). As PI(3,4)P<sub>2</sub> is depleted when VSP dephosphorylates the 3-phosphate, the TAPP-PH unbinds and the FRET ratio decreases (Fig 6B). Thus, we combine the optical measurements of the biosensors with TEVC to precisely control and monitor catalytic activity of XI-VSPs.

**Fig 6. XI-VSP1 and XI-VSP2 function as voltage-regulated 5- and 3-phosphatases.** (A) Schematics of the known VSP reactions. (B) Cartoon representation of fTAPP binding and release with increasing

and decreasing PI(3,4)P<sub>2</sub> concentrations. The binding of fTAPP to PI(3,4)P<sub>2</sub> results in a conformational change that increases the FRET signal. Similarly, a reduction of PI(3,4)P<sub>2</sub> results in a decrease in the FRET signal. (C) Oocytes were injected with fTAPP and either XI-VSP1, XI-VSP2 or XI-VSP2 C301S (XI2-CS), a catalytically inactivated protein. (left) Averaged fTAPP FRET traces over time during a voltage step from a holding potential of -100 to +160 mV. The FRET signal increases and decreases in the same pulse for XI-VSP1 while it only increases for XI-VSP2. (right) FRET measurements were tested at several voltages and the  $\Delta F/F$  fTAPP FRET ratio was plotted versus the voltage (RV). The FRET increase (net 5-phosphatase reaction, solid line, closed symbols) was plotted separately from the FRET decrease (net 3-phosphatase reaction, dashed line, open symbols). XI-VSP1 shows robust activity as both a 3- and 5- phosphatase while XI-VSP2 functions as a 5-phosphatase. (D) Oocytes were injected with fPLC and either XI-VSP1, XI-VSP2 or XI2-CS. The  $\Delta F/F$  fPLC FRET RV shows a FRET decrease (net 5-phosphatase reaction, solid line, closed symbols) for both XI-VSP1 and 2 indicating both dephosphorylate PI(4,5)P<sub>2</sub>. (E) Oocytes were injected with gPLC and either XI-VSP1, XI-VSP2 or XI2-CS. GFP fluorescence measurements were tested at several voltages and the fluorescence voltage relationship plotted showing a fluorescence increase (net 3-phosphatase reaction, dashed line, open symbols). While XI-VSP1 shows significant levels of 3-phosphatase activity against PI(3,4,5)P<sub>3</sub>, XI-VSP2 is a much less efficient 3-phosphatase. (F) Averaged fPLC FRET traces over time during a voltage step from a holding potential of -100 to +160 mV for fPLC co-expressed with either XI-VSP1 or XI-VSP2. The kinetics of activation are significantly faster for XI-VSP1 than for XI-VSP2. All error bars are  $\pm$  SEM.,  $n \geq 8$ . Data fit with single Boltzmann equations

When oocytes co-expressed XI-VSP1 and fTAPP, we observed XI-VSP1 inducing an initial increase and subsequent decrease in FRET over time, indicating that it functions as both a 5- and a 3-phosphatase (Fig 6C, left). To determine the voltage dependence of activity, we tested several voltages and plotted the FRET versus voltage relationships. To better understand each reaction, we separated the FRET increase from the FRET decrease during our analysis (Fig 6C, right, blue). Note the voltage

dependence of the XI-VSP1 5-phosphatase reaction (FRET increase,  $V_{1/2} = 55$  mV) is lower than the voltage dependence of the 3-phosphatase (FRET decrease,  $V_{1/2} = 97$  mV) (S1 Table). As a control, we also tested a catalytically inactive XI-VSP2 C301S (XI2-CS) (22) with fTAPP. As expected, a slight, continuous FRET increase was observed. This small signal is expected because it has been previously shown that a low level of endogenous XI-VSP activity is present in *X. laevis* oocytes (14,22,41,42,44). Interestingly, the same fTAPP experiment with XI-VSP2 only showed a FRET increase (Fig 6C, green) even when we extended the voltage pulse to 60 seconds (data not shown). Additionally, as was previously reported (22), the voltage dependence of XI-VSP2 5-phosphatase activity against  $PI(3,4,5)P_3$  is shifted to higher voltages ( $V_{1/2} = 92$  mV) compared to that of XI-VSP1 ( $V_{1/2} = 55$  mV) (S1 Table). These results indicate that, although the XI-VSP homologs are 93% identical, they do not share identical voltage-dependent functional roles in the cell.

To follow  $PI(4,5)P_2$ , we used two different biosensors based on the PLC-PH domain, one FRET sensor which utilized the PH domain from PLC instead of TAPP to create fPLC, and a fluorescence sensor where GFP is attached to the N-terminus of PLC, called gPLC. We used fPLC to monitor the 5-phosphatase activity during the  $PI(4,5)P_2$  to  $PI(4)P$  reaction. When oocytes co-expressed either XI-VSP1 or XI-VSP2 with fPLC, we observed robust FRET ratio decreases (Fig 6D), indicating 5-phosphatase activity for both homologs, as was previously published (22). We used gPLC to monitor the 3-phosphatase reaction, the  $PI(3,4,5)P_3$  to  $PI(4,5)P_2$  reaction, because the gPLC sensor is a more sensitive sensor for this reaction than fPLC. Instead of a change in FRET, the gPLC translocates to the membrane when  $PI(4,5)P_2$  concentrations increase, resulting in an increase in fluorescence. When oocytes co-expressed XI-VSP1 with gPLC, we observed an increase in fluorescence, indicating the production of  $PI(4,5)P_2$  from the XI-VSP 3-phosphatase reaction (Fig 6E, blue). Unexpectedly, the same experiment with XI-VSP2 also gave a small, but reproducible fluorescence increase (Fig 6E, green), indicating XI-VSP2 is also able to function as a 3-phosphatase. However, we did not observe any 3-phosphatase activity when using the fTAPP sensor. These results show that XI-VSP2 can remove the 3-phosphate from  $PI(3,4,5)P_3$  but not from  $PI(3,4)P_2$ . Further investigations are needed to

better understand this striking difference in substrate specificity. Interestingly, the kinetics of XI-VSP2 are significantly slower than the kinetics of XI-VSP1 (Fig 6F), as seen by the voltage steps to 160 mV for a 2 second voltage step for XI-VSP1 and a 10 second voltage step for XI-VSP2 (Fig 6F). Overall, our results show that XI-VSP1 can catalyze the same four reactions as other VSPs while XI-VSP2 is restricted by substrate. Since the reactions and kinetics appear to be different between XI-VSP1 and 2, they likely fulfill different functional roles in tissues which correlates with their differential expression patterns.

## Discussion

VSPs provide a direct link between the electrical state of a cell and its PIP signaling pathways. By dephosphorylating PIPs in a voltage dependent manner, VSPs could regulate PIP-dependent processes such as cortical cytoskeleton remodeling, ion channel function, G protein-coupled receptor signaling (GPCR) and intracellular calcium signaling (18,19,45). Though the biophysical properties of VSPs have been the subject of intense study since the discovery of Ci-VSP (10), the physiological relevance of this direct link remains unclear.

To elucidate XI-VSPs' biological role, we determined the cellular expression pattern of XI-VSP RNA and protein in *Xenopus laevis*. We extended our previous findings in adult *X. laevis* tissues (22) by showing both XI-VSP1 and 2 RNA transcripts in developing embryos. Though VSP is seen in the embryonic stages of other species, this is the first study showing XI-VSP RNA and protein in *X. laevis* embryos. Our findings indicate that XI-VSP RNAs are present at early stages of development, NF stages 12-40, with both XI-VSP1 and 2 RNA levels increasing from NF stage 20 to 40. At the same stages, we observed an increase in protein levels by Western blot, consistent with our RNA detection, indicating an upregulation of the protein during development. Using ISH, we observed XI-VSP RNA transcripts in both the brain and pronephros of NF stage 32-36 embryos. Using IHC, we found XI-VSP protein in the pronephroi of NF stage 42 embryos. Upon sectioning the embryos, we observed anti-VSP staining on the luminal surface of the pronephritic tubules, corresponding to the apical membrane of

the epithelial cells lining the tubule lumen. Additionally, we sectioned adult kidneys and found the same apical membrane localization in the tubules. To directly test XI-VSP catalytic activation, we combined electrophysiology with optical biosensors to show that both XI-VSPs dephosphorylate the 3- and 5-phosphate from PIPs though with different substrate specificities and efficiencies. Combining our localization results with our electrophysiological activity data, we suggest that XI-VSPs have specific functional roles in both the brain and kidney.

Concentrating on the kidney, we found XI-VSPs spanning the earliest stages of the developing pronephros into the full adult kidney, suggesting XI-VSPs modulate PIP concentrations on the apical membrane of the kidney epithelial cells in a voltage dependent manner. Kidney tubules are lined with specialized epithelial cells that regulate vertebrate solute homeostasis (46,47). The transepithelial potential difference across these cells contributes to tubular reabsorption of solutes and water (48,49). The luminal surface of these epithelial cells are decorated with microvilli and primary cilia, both of which function in tubular reabsorption by sensing fluid flow (50–54). Microvilli provide a large absorptive membrane surface for kidney epithelial cells and are actin-dependent dynamic structures with turnover rates in the tens of minutes (55). Heterologously expressed Gg-VSP influences actin-based cytoskeleton rearrangements in cultured chick fibroblasts leading to morphological changes in cortical cell structure (56), suggesting XI-VSPs could modify the actin-based microvilli in kidney epithelial cells. In addition, GPCR signaling originating in microvilli at the apical membrane of proximal kidney tubules is directly influenced by local PI(4,5)P<sub>2</sub> concentrations (57), which is a substrate for both XI-VSPs. Likewise, primary cilia are dependent on local PI(4,5)P<sub>2</sub> concentrations (58), and importantly, trigger calcium entry due to the mechanical forces from the fluid flow (54). As calcium enters the cells, the resulting depolarization could lead to activation of the XI-VSP on the apical membrane and subsequent regulation of the cortical cytoskeleton, GPCRs, and ion channels during renal tubule development and adult renal function.

Our results are consistent with VSP homologs having a broad role in multiple tissues. Specifically, our study agrees with previous studies that also showed embryonic kidney tubule



expression of VSP in zebrafish (31), and chicks (21). In particular, Gg-VSP RNA was found on the proximal part of the nephrogenic tubules of HH stage 26 chicks and not the distal or collecting tubules, consistent with our IHC results showing proximal tubule localization in NF stage 32 embryos (S2 Fig). Our findings in *X. laevis* are also consistent with the findings in chicks in that not all tubules appear to immunostain with our VSP antibody, indicating that the XI-VSPs may be restricted to a functional subset of the developing and adult kidney. Our results go further because we observe clear XI-VSP protein immunostaining on the apical membrane of the tubules where reabsorption of nutrients occurs and where PIP-mediated signaling originates.

Not all VSP studies analyzed kidney expression patterns. The human VSP, Hs-VSP1 (previously called TPIP and TPTE2), was not examined in kidneys, making human VSP kidney expression unknown (20). In addition to kidney expression, VSP is also expressed in the brain and nervous system of multiple species (20,22,28,30,32). Indeed, we observed XI-VSP RNA transcripts and protein in the brain of adult and embryonic *X. laevis*. Some reports of VSP expression conflict, particularly regarding expression of mouse VSP, Mm-VSP (previously called PTEN2). Early studies identified Mm-VSP as a testis specific protein (25) while subsequent investigations report expression in the brain (32). While more research is needed, a pattern is emerging with the kidney and brain being the most consistent tissues expressing VSP. Our results support this pattern and a functional role for VSP in both the brain and kidney of multiple vertebrate species.

The subcellular localization of VSP is also debated in the field. Prior studies of native VSP protein have found VSP on the plasma membrane of ascidian sperm (10) and of Purkinje neurons in chick cerebellum sections (30). Along with plasma membrane localization, however, the cerebellum sections also showed intracellular staining with a Gg-VSP antibody. A more recent study in mice used dissociated cortical neurons from P0-1 mice and the staining appears throughout the cells (32). In addition, heterologous expression of mouse and human VSP consistently show intracellular membrane localizations (20,25,29). In contrast, our subcellular localization of endogenous XI-VSP protein is on the apical membrane of kidney tubule epithelia. The differences in our results and those from prior studies



may lie in the tissues tested, the antigen retrieval discussed below, or in the antibodies used. Further experiments are needed to determine whether VSPs function on both intracellular and plasma membranes. While not tested against either chicken or mouse VSPs, our antibody does cross react with VSPs from *D. rerio*, *X. tropicalis* and *C. intestinalis*. As a result, N432/21 may prove to be an invaluable tool in future studies of VSP's physiological role in vertebrate kidney development and neural function.

It is interesting to note that unlike in fixed embryonic kidney tissue, we only observed staining of adult kidney tissue after post-fixation antigen retrieval. This difference in VSP epitope availability could be due to different roles for VSP in adult versus embryonic kidney tubules, and differential VSP binding partners in these tissues. We recently demonstrated that Ci-VSP forms dimers (42). Since the two XI-VSP homologs shown here display different expression in the embryo and adult frog, it is also possible that the difference we observed in VSP epitope availability is due to the presence of XI-VSP homodimers and heterodimers.

In addition to our localization experiments, we also tested the electrophysiological characteristics of both XI-VSP homologs. We controlled their activation using TEVC and monitored the production and depletion of different PIPs using optical biosensors. Our previous report indicated that both homologs catalyzed the dephosphorylation of the 5-phosphate from  $PI(4,5)P_2$ . VSPs from other species have been shown to utilize  $PI(3,4,5)P_3$  and  $PI(3,4)P_2$  as substrates as well. Here, we tested all three substrates by using PIP sensors that are sensitive to either  $PI(3,4)P_2$  or  $PI(4,5)P_2$  concentrations (TAPP-PH or PLC-PH respectively), allowing us to monitor the 3-phosphate removal from  $PI(3,4,5)P_3$  and  $PI(3,4)P_2$  as well as the 5-phosphate removal from  $PI(3,4,5)P_3$  and  $PI(4,5)P_2$ . We found that XI-VSP1 behaves much like other VSPs in that it dephosphorylates both 5- and 3-phosphates. XI-VSP2, on the other hand, is a slower 5-phosphatase and a weaker 3-phosphatase. After modifying our protocols for longer depolarizations to account for the slower kinetics, we observed clear 5-phosphatase activity for XI-VSP2 using both fTAPP and fPLC sensors. The voltage-dependence of activation was shifted to higher voltages for XI-VSP2 compared to XI-VSP1. We also observed 3-

phosphatase activity of XI-VSP2 against PI(3,4,5)P<sub>3</sub>, but not against PI(3,4)P<sub>2</sub>, even after a one minute depolarization. This difference between the XI-VSP homologs further indicates that the two are not interchangeable and serve different physiological roles in the cell.

In conclusion, we observe XI-VSP expression in the brain and kidney of *X. laevis* embryos and adults. We localize XI-VSP protein on the apical membrane of kidney tubule epithelial cells, and we characterize both XI-VSPs as 3- and 5- phosphatases with different enzymatic activities. Our results indicate a role for voltage-dependent dephosphorylation of both 5- and 3-phosphates from PIPs on the apical membrane during kidney tubule development and renal function.

## Materials and methods

### Materials

*Ciona intestinalis* VSP (Ci-VSP, NM\_001033826) and *Danio rerio* VSP (Dr-VSP, NM\_001025458) plasmids were kindly provided by Y. Okamura (Osaka University, Osaka, Japan). *X. laevis* VSP1 (XI-VSP1, NM\_001096603), *X. laevis* VSP2 (XI-VSP2, NM\_001280607), and *X. tropicalis* VSP (Xt-VSP, NM\_001015951) expression plasmids were made in Laurinda Jaffe's laboratory and are available through Addgene (Cambridge, MA). While the original human gene was named transmembrane phosphatase with tensin homology (TPTE), the majority of the literature refer to this protein as the voltage sensing phosphatase or VSP. Here, we follow this more common nomenclature to avoid confusion. fPLC and fTAPP were both kindly provided by E.Y. Isacoff (University of California, Berkeley). GFP-PLC-PH was kindly provided by T. Meyer (Stanford University). Mutations and epitope tags were created by site-directed mutagenesis with Pfu Turbo DNA polymerase (Agilent, Santa Clara, CA) by standard protocols. All DNA constructs were confirmed by sequencing. cRNA was transcribed using SP6 or T7 mMessage mMachine kits (Thermo-Fisher, Waltham, MA). *X. laevis* oocytes for XI-VSP activity assays were purchased from Xenopus 1 (Dexter, MI). Mouse monoclonal anti-VSP (N432/21; RRID:AB\_2716253) was made by the UC Davis/NIH NeuroMab Facility and is available

through Antibodies Incorporated (Davis, CA). Anti-beta actin (clone C4, catalog # sc-47778) was purchased from Santa Cruz Biotechnology (Dallas, TX). 3G8.2C11 antibody was obtained from the European Xenopus Resource Centre (59,60). Goat anti-mouse IgG, light chain specific, conjugated to horseradish peroxidase (HRP, catalog # 115-035-174) was purchased from Jackson ImmunoResearch (West Grove, PA). Goat anti-mouse IgG conjugated to Alexa Fluor 488 or Alexa Fluor 594 was purchased from Thermo Fisher. Anti-digoxigenin (DIG) conjugated to alkaline phosphatase (AP) was purchased from Sigma-Aldrich (St. Louis, MO). Cdh17:GFP and Pax8:GFP transgenic *Xenopus laevis* frogs were obtained through the National Xenopus Resource (Woods Hole, MA, RRID:SCR\_013731) (35,36,60). All animals in this study were used in accordance with protocols approved by the Montana State University IACUC.

## Reverse-transcriptase PCR

Total RNA was isolated from embryos with TRIzol (Thermo Fisher), quantitated by Nanodrop spectrophotometry and analyzed by ethidium bromide agarose gel electrophoresis (S1 Fig). Two µg of embryo RNA was treated with DNase I (DNA-free, Thermo Fisher) to remove genomic DNA and cDNAs were reverse-transcribed by priming with oligo-dT using SuperScript IV reverse transcriptase (Thermo Fisher). A parallel control reaction was performed without reverse-transcriptase for each DNase I-treated RNA. Semi-quantitative PCR was performed on 1/20<sup>th</sup> of the resulting cDNA using primers for XI-VSP1 (forward: GATGCTGGAAACAACCTCCATAGTCC; reverse: GCTGTGTATGTGGTCAGAACAC) or XI-VSP2 (forward: GATGCTGGGAACAATTCCGTAGTCA; reverse: GGGTAATAGTACGTTAAGAAGTG) with Taq polymerase in Standard Taq PCR buffer (New England Biolabs, Ipswich, MA) with the thermocycling parameters: 95°C for 30 sec, 37 cycles of 62°C for 20 seconds followed by 68°C for 30 seconds. For each primer pair the forward primer is located upstream of an intron and the reverse primer is located in the 3' UTR to ensure allele specificity and amplification of only cDNA. PCR products were analyzed by ethidium bromide agarose gel electrophoresis.

481

## 482 ***In-situ* hybridization (ISH)**

483 Full-length antisense and sense digoxigenin (DIG)-labeled probes were made from linearized  
484 pcDNA3-XI-VSP1 plasmid with SP6 or T7 RNA polymerase and DIG NTPs (Sigma-Aldrich). *In situ*  
485 hybridization to detect XI-VSP mRNAs was performed on NF stage 32-36 embryos fixed for 90 minutes  
486 in phosphate-buffered 4% paraformaldehyde (pH 7.4) by standard methods (61). Embryos were  
487 probed with anti-DIG IgG-AP, stained with NBT-BCIP (Sigma-Aldrich) and imaged with a ProgRes  
488 C14plus camera (Jenoptic, Germany) through a 5x objective on an Axioscope.A1 microscope (Zeiss,  
489 Germany).

490

## 491 **Defolliculating *X. laevis* oocytes**

492 *X. laevis* ovaries were purchased from Xenopus 1 (Dexter, MI). Ovaries were processed as  
493 described previously (62). Briefly, each ovary was washed once and morselized in Ca<sup>2+</sup>-free (96 mM  
494 NaCl, 2 mM KCl, 1 mM MgCl<sub>2</sub>, and 10 mM HEPES, pH 7.6). The morselized ovary was washed in Ca<sup>2+</sup>-  
495 free to remove yolk from lysed oocytes and then digested at room temperature for 30-45 minutes in 2%  
496 collagenase (Sigma-Aldrich, catalog # C-0130), 0.1% soybean trypsin inhibitor (Sigma-Aldrich, catalog  
497 # T-9003), and 0.1% BSA (Sigma-Aldrich, catalog # A3294) made in Ca<sup>2+</sup>-free. Post-digestion, the  
498 oocytes were washed in oocyte wash buffer (34 mM KH<sub>2</sub>PO<sub>4</sub>, 66 mM K<sub>2</sub>HPO<sub>4</sub>, 0.1% BSA, pH 6.5) at  
499 least 10 times to remove follicles, followed by 10 washes with Ca<sup>2+</sup>-free. The oocytes were then sorted  
500 into ND-96 (96 mM NaCl, 2 mM KCl, 1.8 mM CaCl<sub>2</sub>, 1 mM MgCl<sub>2</sub>, 50 mg/ml gentamicin, 2.5 mM  
501 sodium pyruvate, and 10 mM HEPES, pH 7.6) and cultured at 18°C.

502

## 503 **Western Blotting**

504 Adult *Xenopus laevis* tissue, oocyte, and embryo lysates were made by homogenization and brief  
505 sonication in lysis buffer (150 mM NaCl, 150 mM dithiothreitol, 0.1% CHAPS, 50 mM Tris, pH 7.4) with

protease inhibitors (Roche, Switzerland). *X. laevis* oocytes were injected with 20 ng VSP RNA and cultured at 18°C for 36 hours before lysis. Protein concentrations were determined by a Quick Start Bradford assay (Bio-Rad, Hercules, CA). Lysates were run on 10% polyacrylamide gels at 200 volts for one hour, transferred to ProTran nitrocellulose membranes (GE Healthcare, Chicago, IL) in sodium borate transfer buffer for 70 minutes at 350 mA and stained with Ponceau-S to evaluate equal loading of protein between the wells. Membranes were blocked in TBS-T block buffer (5% non-fat dry milk, 150 mM NaCl, 10 mM, 0.1% Tween-80, 10 mM Tris, pH 7.4) and probed with anti-VSP supernatant at 1:25 dilution or anti-beta actin at 1:500 dilution. Blots were then washed in TBS-T, probed with anti-mouse IgG-HRP and developed with ECL reagent (Sycamore Life Sciences, Houston, TX).

## Immunohistochemistry (IHC)

Adult *Xenopus laevis* kidneys and NF stage 40-42 embryos (34) were fixed in phosphate-buffered 4% paraformaldehyde (pH 7.4) for 90 minutes followed by sequential equilibration for two hours each in 30% sucrose, 30% sucrose/50% O.C.T (Optimal Cutting Temperature) embedding media (Fisher, Hampton, NH), and 100% OCT. Kidney tissues were then snap-frozen in OCT using a dry ice/ethanol slurry and sectioned at 14 µm onto glass slides coated with 0.5% porcine gelatin, type A (Sigma-Aldrich, catalog # G2500) and 0.05% chromium potassium sulfate. Sections were air-dried overnight at room-temperature and stored at -80°C. Sections were rehydrated with phosphate-buffered saline (PBS; 137 mM NaCl, 27 mM KCl, 100 mM Na<sub>2</sub>HPO<sub>4</sub>, 18 mM KH<sub>2</sub>PO<sub>4</sub>, pH 7.4) and subjected to antigen retrieval in 10 mM sodium citrate, 0.05 % Tween-80, pH 6.0 for 20 minutes at 95°C followed by quick cooling on ice. Sections were re-equilibrated with PBS-T (0.1% Triton X-100) and blocked in PBS-T with 10% normal goat serum (Fisher, catalog # 16-210-064). Sections were probed with anti-VSP supernatant at 1:25 dilution, washed in PBS-T, and probed with anti-mouse IgG-Alexa Fluor 488 or anti-mouse IgG-Alexa Fluor 594 at 1:1000 dilution with 1 µg/mL Hoechst 33342 (Thermo-Fisher) to stain nuclei. Immuno-stained sections were mounted in Vectashield (Vector Labs, UK) under glass coverslips and imaged with a 63x/1.4 NA objective on a Leica SP8 confocal microscope (Leica, Buffalo

Grove, IL). Embryo sections were similarly fixed, sectioned, stained and imaged without the antigen retrieval process. Whole-mount embryos were similarly fixed and stained without the antigen retrieval process and with four hours to overnight incubations to allow for antibody penetration. Whole-mount IHC images were captured using Progres Mac CapturePro software on a ProgRes C14plus camera through a Zeiss Plan-neofluar 5x/0.16 NA objective on an Axioscope.A1 microscope. GFP or Alexa Fluor 594 fluorescence in whole-mount immuno-stained embryos was excited by an LED and collected through Zeiss FITC (EX BP 475/40, BS FT 500, EM BP 530/50) or Texas Red (EX BP 560/40, BS FT 585, EM BP 630/75) filter sets, respectively. Anti-VSP, anti-3G8 and matching secondary-alone control samples were imaged using the same excitation intensity and digital gain. IHC was repeated a total of three times with tissue from different animals or clutches of embryos.

## Electrophysiology and fluorescence measurement of activity

Two electrode voltage clamp (TEVC) was performed as previously described (14). FRET-based PIP sensors (41,42) were used to measure depletion of PI(4,5)P<sub>2</sub> or the production and depletion of PI(3,4)P<sub>2</sub>. The PIP sensors were designed by adding an N-terminal CFP and a C-terminal YFP to pleckstrin homology (PH) domains. The PH domains were originally derived from phospholipase C (PLC) for PI(4,5)P<sub>2</sub> and the tandem PH domain containing protein 1 (TAPP) for PI(3,4)P<sub>2</sub>, and hence were called fPLC and fTAPP respectively. To measure production of PI(4,5)P<sub>2</sub>, the diffusion based sensor GFP-PLC (gPLC) was used which has a GFP was attached to the N-terminus of the PLC-PH domain. All XI-VSP cRNAs (0.8 µg/µl) were mixed with either fPLC cRNA (0.4 µg/µl), fTAPP cRNA (0.4 µg/µl) or gPLC cRNA (0.06 µg/µl) and injected into *X. laevis* oocytes. In all experiments, 50 nl of the cRNA mixtures were injected into oocytes and incubated in ND-96 for 30-40 hours. On the day of the experiments, cells were transferred from ND-96 to ND-96' (ND-96 without gentamicin and sodium pyruvate) containing 8 µM insulin to promote PI3 kinase activity and up-regulate PI(3,4,5)P<sub>3</sub> levels.

A Leica DM IRBE inverted microscope with a Leica HC PI APO 20x/0.7 fluorescence objective was used with a Dagan CA-1B amplifier and illuminated with a Lumen Dynamics X-Cite XLED1 light

source. Fluorescence was measured with a ThorLabs photomultiplier tube (PMT). The amplifier and light-emitting diode were controlled by a Digidata-1440A board and Axon™ pClamp™ 10.7 software package (Molecular Devices). For the FRET experiments, light was filtered through a HQ436/20 excitation filter and directed to the objective with a 455LP dichroic (Chroma). The microscope cube did not contain an emission filter, because the ThorLabs PMT module contains its own cube. Thus, the emitted light was filtered before the PMTs with a 510-nm dichroic, an HQ480/40 emission filter for CFP, and an HQ535/30 emission filter for YFP (Chroma). For the gPLC experiments, light was filtered through a HQ470/40 excitation filter, an HQ525/50 emission filter and a Q496LP dichroic (Chroma). The voltage protocol consisted of steps from -100 to 180 mV in irregular increments. The length of the voltage pulse was 1.5-2 s for XI-VSP1 and varied for XI-VSP2, 2-10 s for fTAPP, and fPLC, and 3 s for gPLC. Rest periods of 1-3 min between voltage steps were used to allow the cell to recover depleted PIP concentrations before the next voltage step. The resulting FRET or fluorescence was then plotted versus the voltage to generate the fluorescence versus voltage relationship.

## Data analysis

For the FRET experiments, Axon™ Clampfit™ 10.7 (Molecular Devices) was used to calculate the FRET ratio. For the FRET or fluorescence increases (fTAPP and gPLC), the  $\Delta F/F$ ,  $(F_{after} - F_{before}) / F_{before}$ , was calculated from the pre-pulse baseline to the max signal increase. For the fPLC FRET decrease, the  $\Delta F/F$  was calculated from the pre-pulse baseline to the max FRET decrease. For the fTAPP FRET decrease, the  $\Delta F/F$  was calculated from the max FRET increase to the max FRET decrease. Calculations were done in Excel (Microsoft) or IGOR Pro (WaveMetrics) and data was plotted in IGOR Pro. When bleaching was observed, it was corrected by fitting to a line and dividing the values by the fit to obtain the final, bleaching-corrected signal. Final voltage dependent curves were plotted with change in FRET or fluorescence on the Y-axis and voltage on the X-axis. The data were fit to single Boltzmann equations. Activity assays were repeated on oocytes extracted on different days



from at least three different frogs (biological replicates) until data from a minimum of 8 oocytes were acquired and analyzed. Error bars indicate standard error of the mean (SEM). IHC images were processed with NIS-Elements (Nikon). Fluorescence signals from anti-VSP and matching secondary-alone control images were processed in parallel while applying the same post-image processing parameters in each case. Figures were made either in Illustrator or Photoshop 2018 (Adobe).

## Acknowledgements

We thank Y. Okamura (Osaka University, Osaka, Japan) for kindly providing the Ci-VSP and Dr-VSP cDNAs, E.Y. Isacoff (University of California, Berkeley) for providing the fPLC and fTAPP and T. Meyer for providing the gPLC. We also thank D. Rashid and M. Chaverra for technical assistance and advice.

## Author contributions

W. Ratzan and S.C. Kohout conceived and designed the experiments. W. Ratzan, S.E. Killian, V. Rayaprolu, R. Bradley and S.C. Kohout collected and analyzed data. W. Ratzan, V. Rayaprolu and S.C. Kohout wrote the manuscript. All authors approved the final version of the manuscript.

## References

1. Di Paolo G, De Camilli P. Phosphoinositides in cell regulation and membrane dynamics. *Nature* 2006;443(7112): 651–7.
2. Balla T. Phosphoinositides: Tiny Lipids With Giant Impact on Cell Regulation. *Physiol Rev* 2013;93(3): 1019–137.
3. McCrea HJ, De Camilli P. Mutations in Phosphoinositide Metabolizing Enzymes and Human



- 606 Disease. Physiology 2009;24(1): 8–16.
- 607 4. Hakim S, Bertucci MC, Conduit SE, Vuong DL, Mitchell CA. Inositol polyphosphate  
608 phosphatases in human disease. Curr Top Microbiol Immunol 2012;362: 247–314.
- 609 5. Clayton EL, Minogue S, Waugh MG. Phosphatidylinositol 4-kinases and PI4P metabolism in the  
610 nervous system: Roles in psychiatric and neurological diseases. Mol Neurobiol 2013;47(1): 361–  
611 72.
- 612 6. Waugh MG. PIPs in neurological diseases. Biochim Biophys Acta - Mol Cell Biol Lipids  
613 2015;1851(8): 1066–82.
- 614 7. Shi T-JS, Liu S-XL, Hammarberg H, Watanabe M, Xu Z-QD, Hokfelt T. Phospholipase C 3 in  
615 mouse and human dorsal root ganglia and spinal cord is a possible target for treatment of  
616 neuropathic pain. Proc Natl Acad Sci 2008;105(50): 20004–8.
- 617 8. Wright BD, Loo L, Street SE, Ma A, Taylor-Blake B, Stashko MA, et al. The Lipid Kinase  
618 PIP5K1C Regulates Pain Signaling and Sensitization. Neuron 2014;82(4): 836–47.
- 619 9. Ludtmann MHR, Boeckeler K, Williams RSB. Molecular pharmacology in a simple model system:  
620 Implicating MAP kinase and phosphoinositide signalling in bipolar disorder. Semin Cell Dev Biol  
621 2011;22(1): 105–13.
- 622 10. Murata Y, Iwasaki H, Sasaki M, Inaba K, Okamura Y. Phosphoinositide phosphatase activity  
623 coupled to an intrinsic voltage sensor. Nature 2005;435(7046): 1239–43.
- 624 11. Iwasaki H, Murata Y, Kim Y, Hossain MI, Worby CA, Dixon JE, et al. A voltage-sensing  
625 phosphatase, Ci-VSP, which shares sequence identity with PTEN, dephosphorylates  
626 phosphatidylinositol 4,5-bisphosphate. Proc Natl Acad Sci 2008;105(23): 7970–5.
- 627 12. Halaszovich CR, Schreiber DN, Oliver D. Ci-VSP is a depolarization-activated

- 628           phosphatidylinositol-4,5-bisphosphate and phosphatidylinositol-3,4,5-trisphosphate 5'-  
629           phosphatase. J Biol Chem 2009;284(4): 2106–13.
- 630   13.   Kurokawa T, Takasuga S, Sakata S, Yamaguchi S, Horie S, Homma KJ, et al. 3' Phosphatase  
631           activity toward phosphatidylinositol 3,4-bisphosphate [PI(3,4)P<sub>2</sub>] by voltage-sensing  
632           phosphatase (VSP). Proc Natl Acad Sci 2012;109(25): 10089–94.
- 633   14.   Castle PM, Zolman KD, Kohout SC. Voltage-sensing phosphatase modulation by a C2 domain.  
634           Front Pharmacol 2015;6(Mar): 1–15.
- 635   15.   Henquin JC. Triggering and amplifying pathways of regulation of insulin secretion by glucose.  
636           Diabetes 2000;49(11): 1751–60.
- 637   16.   Hebert SC. Molecular Diversity and Regulation of Renal Potassium Channels. Physiol Rev  
638           2005;85(1): 319–71.
- 639   17.   Rohacs T. Phosphoinositide regulation of TRP channels. In Nilius B, Flockerzi V (eds)  
640           Mammalian Transient Receptor Potential (TRP) Cation Channels: Handbook of Experimental  
641           Pharmacology 2014; p. 1143–76.
- 642   18.   Hille B, Dickson EJ, Kruse M, Vivas O, Suh BC. Phosphoinositides regulate ion channels.  
643           Biochim Biophys Acta - Mol Cell Biol Lipids 2015;1851(6): 844–56.
- 644   19.   Hansen SB. Lipid agonism: The PIP<sub>2</sub> paradigm of ligand-gated ion channels. Biochim Biophys  
645           Acta - Mol Cell Biol Lipids 2015;1851(5): 620–8.
- 646   20.   Walker SM, Downes CP, Leslie NR. TPIP: a novel phosphoinositide 3-phosphatase. Biochem J  
647           2001;360(Pt 2): 277–83.
- 648   21.   Neuhaus H, Hollemann T. Kidney specific expression of cTPTE during development of the chick  
649           embryo. Gene Expr Patterns 2009;9(8): 568–71.

- 650 22. Ratzan WJ, Evsikov A V., Okamura Y, Jaffe LA. Voltage sensitive phosphoinositide  
651 phosphatases of *Xenopus*: Their tissue distribution and voltage dependence. *J Cell Physiol*  
652 2011;226(11): 2740–6.
- 653 23. Mutua J, Jinno Y, Sakata S, Okochi Y, Ueno S, Tsutsui H, et al. Functional diversity of voltage-  
654 sensing phosphatases in two urodele amphibians. *Physiol Rep* 2014;2(7): e12061-13.
- 655 24. Chen H, Rossier C, Morris MA, Scott HS, Gos A, Bairoch A, et al. A testis-specific gene, TPTE,  
656 encodes a putative transmembrane tyrosine phosphatase and maps to the pericentromeric  
657 region of human chromosomes 21 and 13, and to chromosomes 15, 22, and Y. *Hum Genet*  
658 1999;105(5): 399–409.
- 659 25. Wu Y, Dowbenko D, Pisabarro MT, Dillard-Telm L, Koeppen H, Lasky LA. PTEN 2, a Golgi-  
660 associated Testis-specific Homologue of the PTEN Tumor Suppressor Lipid Phosphatase. *J Biol*  
661 *Chem* 2001;276(24): 21745–53.
- 662 26. Hossain I, Iwasaki H, Okochi Y, Chahine M, Higashijima S, Nagayama K, et al. Enzyme domain  
663 affects the movement of the voltage sensor in ascidian and zebrafish voltage-sensing  
664 phosphatases. *J Biol Chem* 2008;283(26): 18248–59.
- 665 27. Reymond A, Marigo V, Yaylaoglu MB, Leoni A, Ucla C, Scamuffa N, et al. Human chromosome  
666 21 gene expression atlas in the mouse. *Nature* 2002;420(6915): 582–6.
- 667 28. Ogasawara M, Sasaki M, Nakazawa N, Nishino A, Okamura Y. Gene expression profile of Ci-  
668 VSP in juveniles and adult blood cells of ascidian. *Gene Expr Patterns* 2011;11(3–4): 233–8.
- 669 29. Guipponi M, Tapparel C, Jousson O, Scamuffa N, Mas C, Rossier C, et al. The murine  
670 orthologue of the Golgi-localized TPTE protein provides clues to the evolutionary history of the  
671 human TPTE gene family. *Hum Genet* 2001;109(6): 569–75.
- 672 30. Yamaguchi S, Aoki N, Kitajima T, Okamura Y, Homma KJ. Expression of the voltage-sensing

- 673 phosphatase gene in the chick embryonic tissues and in the adult cerebellum. Commun Integr  
674 Biol 2014;7(5): e9705021-5.
- 675 31. Thisse Thisse, Christine B. Fast Release Clones: A High Throughput Expression Analysis. .  
676 Available from: <https://zfin.org/ZDB-PUB-040907-1ZFIDirectDataSubmission>. 2004.
- 677 32. Rosasco MG, Gordon SE, Bajjalieh SM. Characterization of the Functional Domains of a  
678 Mammalian Voltage-Sensitive Phosphatase. Biophys J 2015;109(12): 2430–91.
- 679 33. Session AM, Uno Y, Kwon T, Chapman JA, Toyoda A, Takahashi S, et al. Genome evolution in  
680 the allotetraploid frog *Xenopus laevis*. Nature 2016;538(7625): 336–43.
- 681 34. Nieuwkoop PD, Faber J. Normal table of *Xenopus laevis* (Daudin) : a systematical and  
682 chronological survey of the development from the fertilized egg till the end of metamorphosis.  
683 1994; 252 p.
- 684 35. Ochi H, Tamai T, Nagano H, Kawaguchi A, Sudou N, Ogino H. Evolution of a tissue-specific  
685 silencer underlies divergence in the expression of *pax2* and *pax8* paralogues. Nat Commun  
686 2012;3: 847–8.
- 687 36. Corkins ME, Hanania HL, Krneta-Stankic V, Delay BD, Pearl EJ, Lee M, et al. Transgenic  
688 *Xenopus laevis* line for in vivo labeling of nephrons within the kidney. Genes (Basel) 2018;9(4):  
689 114–97.
- 690 37. Keum D, Kruse M, Kim D-I, Hille B, Suh B-C. Phosphoinositide 5- and 3-phosphatase activities  
691 of a voltage-sensing phosphatase in living cells show identical voltage dependence. Proc Natl  
692 Acad Sci 2016;113(26): E3686–95.
- 693 38. Lemmon MA, Ferguson KM, O'Brien R, Sigler PB, Schlessinger J. Specific and high-affinity  
694 binding of inositol phosphates to an isolated pleckstrin homology domain. Proc Natl Acad Sci  
695 USA 1995;92(23): 10472–6.

- 696 39. Stauffer TP, Ahn S, Meyer T. Receptor-induced transient reduction in plasma membrane  
697 PtdIns(4,5)P2 concentration monitored in living cells. *Curr Biol* 1998;8(6): 343–6.
- 698 40. Kimber WA, Trinkle-Mulcahy L, Cheung PCF, Deak M, Marsden LJ, Kieloch A, et al. Evidence  
699 that the tandem-pleckstrin-homology-domain-containing protein TAPP1 interacts with Ptd(3,4)P2  
700 and the multi-PDZ-domain-containing protein MUPP1 in vivo. *Biochem J* 2002;361(3): 525–36.
- 701 41. Grimm SS, Isacoff EY. Allosteric substrate switching in a voltage-sensing lipid phosphatase. *Nat*  
702 *Chem Biol* 2016;12(4): 261–7.
- 703 42. Rayaprolu V, Royal P, Stengel K, Sandoz G, Kohout SC. Dimerization of the voltage-sensing  
704 phosphatase controls its voltage-sensing and catalytic activity. *J Gen Physiol* 2018;150(5):  
705 *jgp.201812064*.
- 706 43. Sato M, Ueda Y, Takagi T, Umezawa Y. Production of PtdInsP3 at endomembranes is triggered  
707 by receptor endocytosis. *Nat Cell Biol* 2003;5(11): 1016–22.
- 708 44. Kohout SC, Bell SC, Liu L, Xu Q, Minor DL, Isacoff EY. Electrochemical coupling in the voltage-  
709 dependent phosphatase Ci-VSP. *Nat Chem Biol* 2010;6(5): 369–75.
- 710 45. Tsujita K, Itoh T. Phosphoinositides in the regulation of actin cortex and cell migration. *Biochim*  
711 *Biophys Acta - Mol Cell Biol Lipids* 2015;1851(6): 824–31.
- 712 46. Warth R. Potassium channels in epithelial transport. *Pflugers Arch Eur J Physiol* 2003;446(5):  
713 505–13.
- 714 47. Nishimura H, Fan Z. Regulation of water movement across vertebrate renal tubules. *Comp*  
715 *Biochem Physiol - A Mol Integr Physiol* 2003;136(3): 479–98.
- 716 48. Barratt LJ, Rector FC, Kokko JP, Seldin DW. Factors governing the transepithelial potential  
717 difference across the proximal tubule of the rat kidney. *J Clin Invest* 1974;53(2): 454–64.

- 718 49. Horisberger JD. Na-K pump current in the Amphiuma collecting tubule. J Gen Physiol  
719 1989;94(3): 493–510.
- 720 50. Wang T, Weinbaum S, Weinstein AM. Regulation of glomerulotubular balance: flow-activated  
721 proximal tubule function. Pflügers Arch Eur J Physiol 2017;469(5–6): 643–54.
- 722 51. Rawlins FA, González E, Pérez-González M, Whitembury G. Effect of transtubular osmotic  
723 gradients on the paracellular pathway in toad kidney proximal tubule - Electron microscopic  
724 observations. Pflügers Arch Eur J Physiol 1975;353(4): 287–302.
- 725 52. Guo P, Weinstein AM, Weinbaum S. A hydrodynamic mechanosensory hypothesis for brush  
726 border microvilli. Am J Physiol Physiol 2000;10031(4): F698–712.
- 727 53. Praetorius HA, Frokiaer J, Nielsen S, Spring KR. Bending the primary cilium opens Ca<sup>2+</sup>-  
728 sensitive intermediate-conductance K<sup>+</sup> channels in MDCK cells. J Membr Biol 2003;191(3): 193–  
729 200.
- 730 54. Praetorius HA, Spring KR. Bending the MDCK cell primary cilium increases intracellular calcium.  
731 J Membr Biol 2001;184(1): 71–9.
- 732 55. Sauvanet C, Wayt J, Pelaseyed T, Bretscher A. Structure, Regulation, and Functional Diversity  
733 of Microvilli on the Apical Domain of Epithelial Cells. Annu Rev Cell Dev Biol 2015;31(1): 593–  
734 621.
- 735 56. Yamaguchi S, Kurokawa T, Taira I, Aoki N, Sakata S, Okamura Y, et al. Potential role of voltage-  
736 sensing phosphatases in regulation of cell structure through the production of PI(3,4)P<sub>2</sub>. J Cell  
737 Physiol 2014;229(4): 422–33.
- 738 57. Mahon MJ. Apical membrane segregation of phosphatidylinositol-4,5-bisphosphate influences  
739 parathyroid hormone 1 receptor compartmental signaling and localization via direct regulation of  
740 ezrin in LLC-PK1 cells. Cell Signal 2011;23(10): 1659–68.

58. Garcia-Gonzalo FR, Phua SC, Roberson EC, Garcia G, Abedin M, Schurmans S, et al. Phosphoinositides Regulate Ciliary Protein Trafficking to Modulate Hedgehog Signaling. *Dev Cell* 2015;34(4): 400–9.
59. Vize PD, Jones EA, Pfister R. Development of the *Xenopus* pronephric system. Vol. 171, *Developmental Biology*. 1995. p. 531–40.
60. Pearl EJ, Grainger RM, Guille M, Horb ME. Development of *xenopus* resource centers: The National *Xenopus* Resource and the European *Xenopus* Resource Center. *Genesis* 2012;50(3): 155–63.
61. Harland RM. Appendix G: In Situ Hybridization: An Improved Whole-Mount Method for *Xenopus* Embryos. . In *Xenopus laevis: Practical Uses in Cell and Molecular Biology* 1991; p. 685–95.
62. De Sousa PA, Masui Y. The effect of cytochalasin D on protein synthesis in *Xenopus laevis* oocytes. *Mol Reprod Dev* 1990;26(3): 248–52.

## Supporting Information

### **S1 Table. Voltage dependence of activity.**

### **S1 Fig. Embryo total RNAs used for sqRT-PCR of XI-VSPs (NF stages 12-40). RNA**

concentrations were determined by Nanodrop spectrophotometry and 1 µg of RNA was run on a 2% agarose gel stained with ethidium bromide. The prominent bands seen here are the 28S and 18S ribosomal RNAs, indicating that the RNAs are not degraded and that approximately equal total RNA was used for subsequent sqRT-PCR analysis.

**S2 Fig. Whole-mount immunohistochemistry (IHC) of NF stage 42 Pax8:GFP embryos.**

Embryos stained with 3G8 antibody (A-C), anti-VSP (A'-C') or secondary antibody alone control (A''-C''). The Pax8:GFP embryos show strong GFP expression in the proximal pronephros (B-B'') as confirmed by staining with the proximal pronephros marker 3G8 antibody (C). XI-VSP staining of tubules is clearly visible (C') and co-localizes with the GFP, indicating XI-VSP in the proximal pronephros. Positive staining is marked with arrowheads, whereas no signal above autofluorescence was seen in control animals stained with secondary antibody alone (C'').



**A**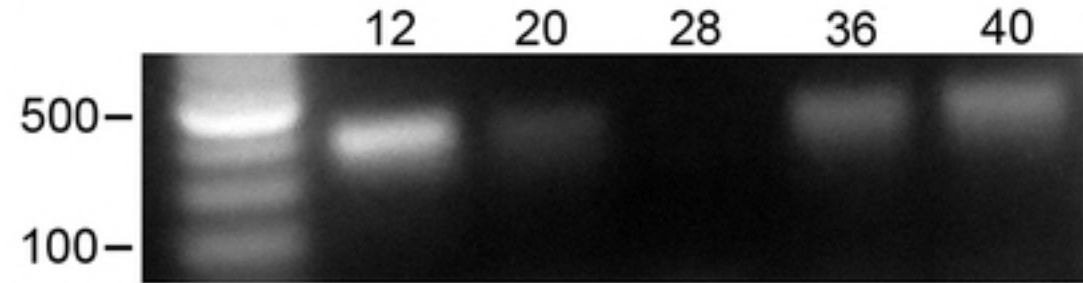**B**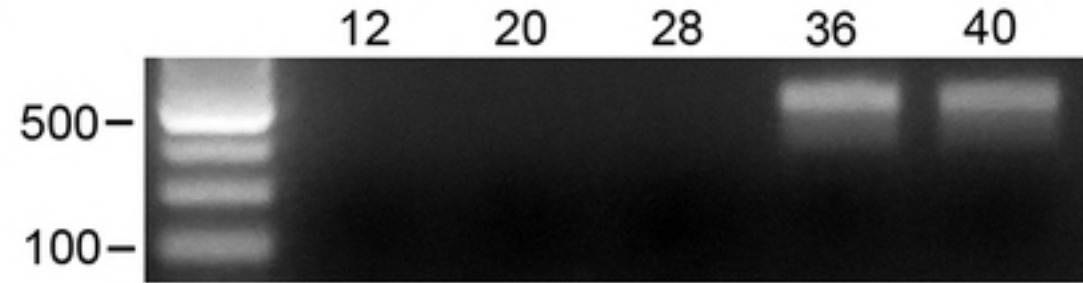**Fig 1**

A

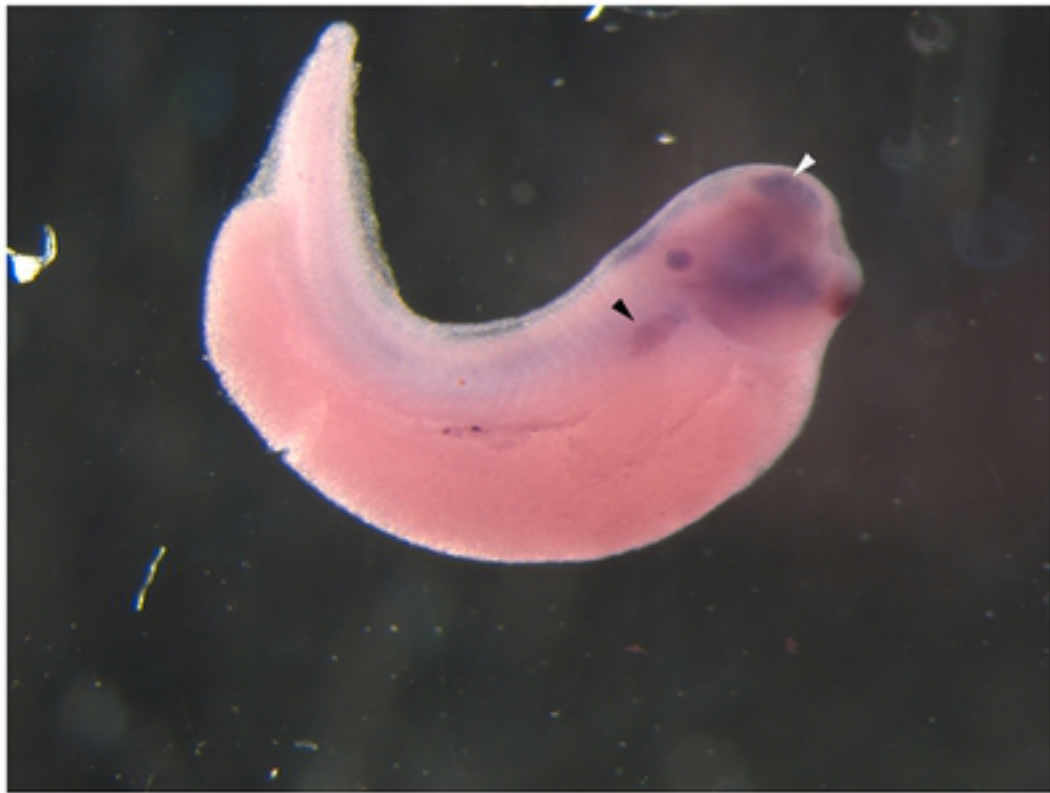

B

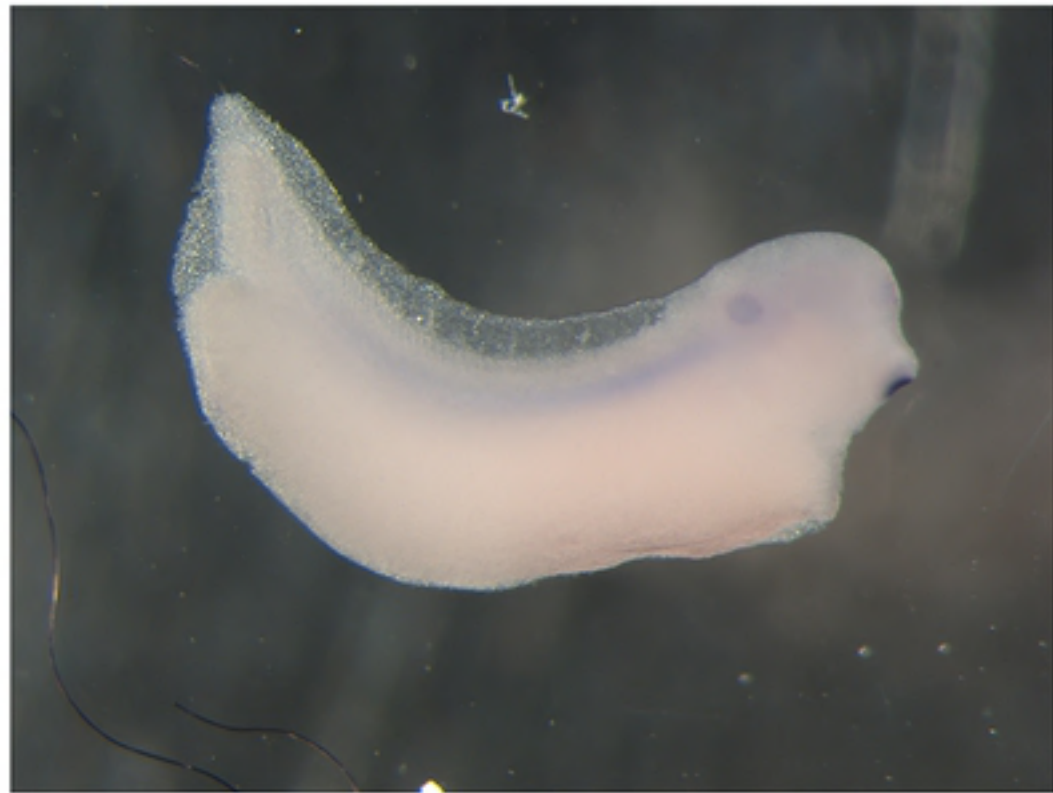

Fig 2

**A**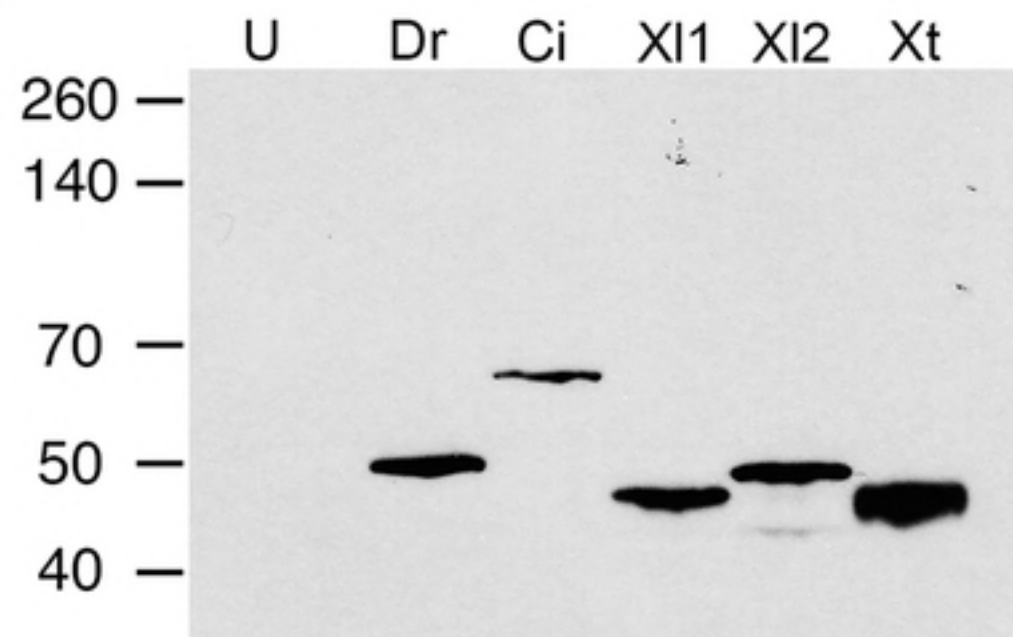**B**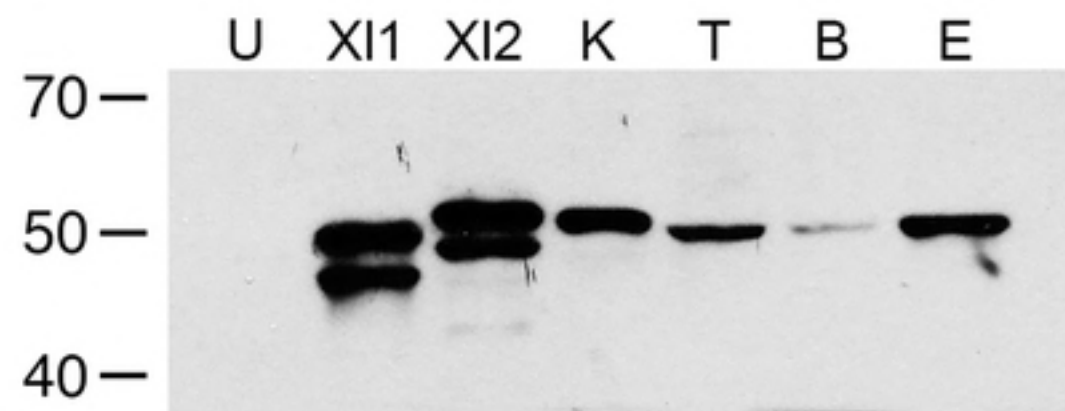**C**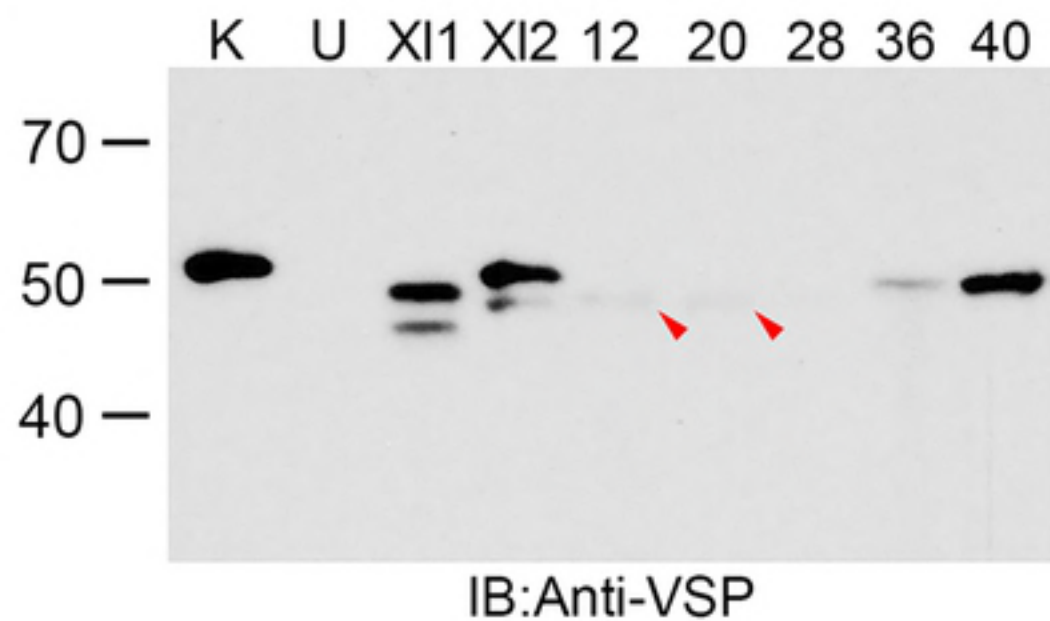**D**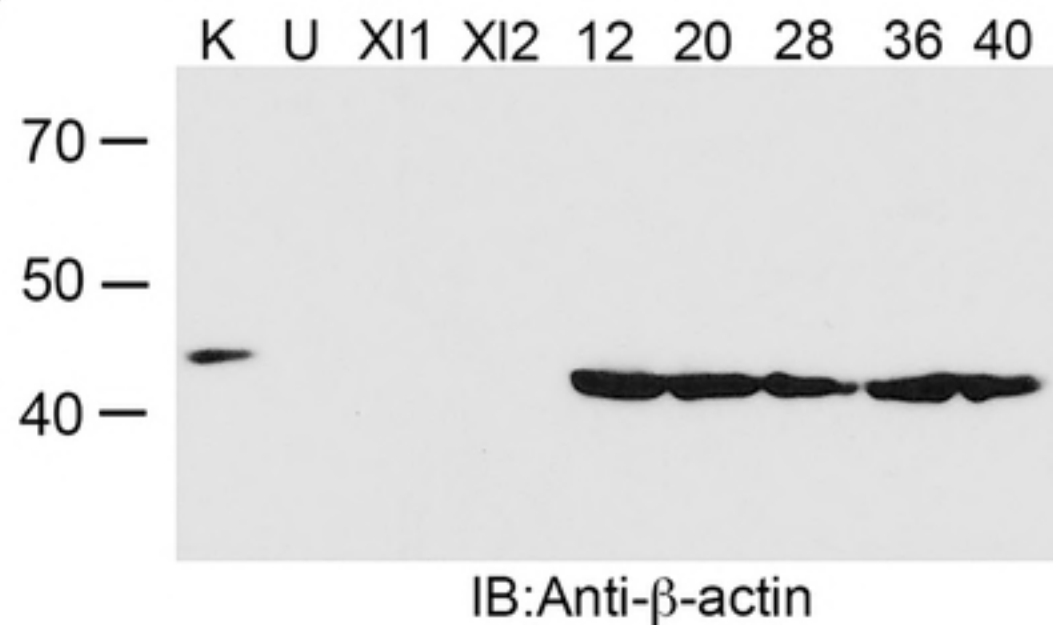**Fig 3**



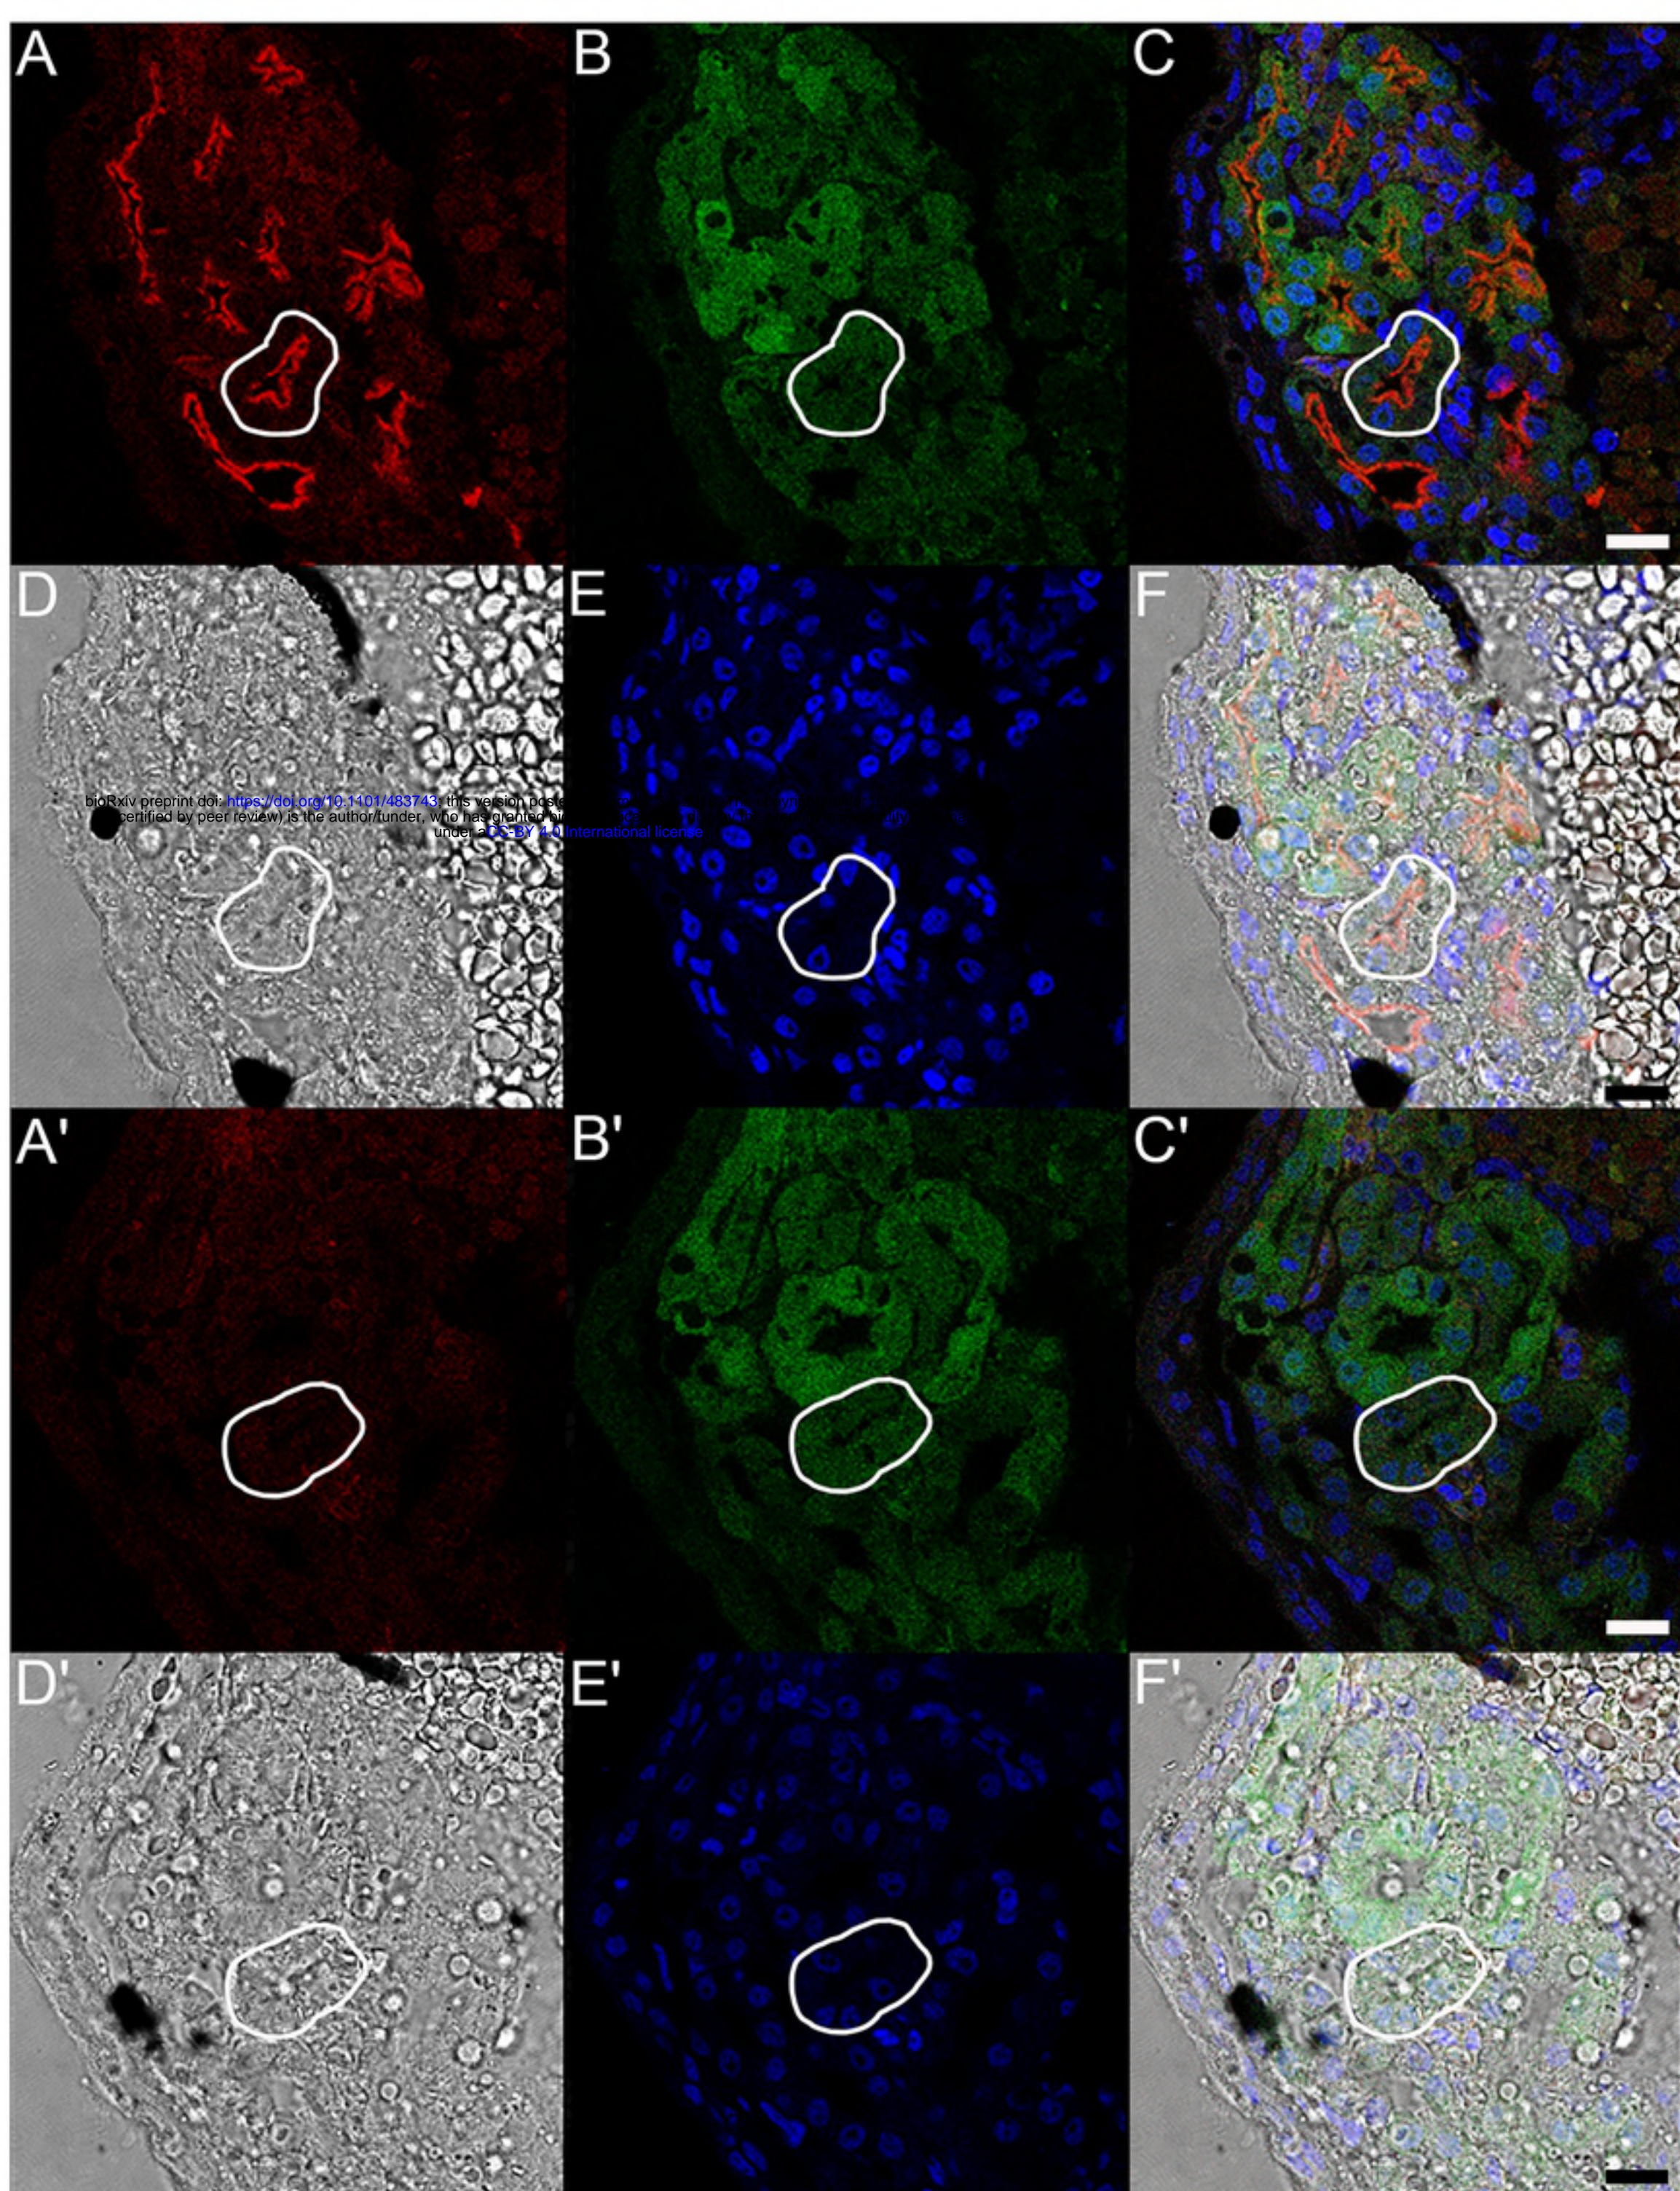

Fig 4



A

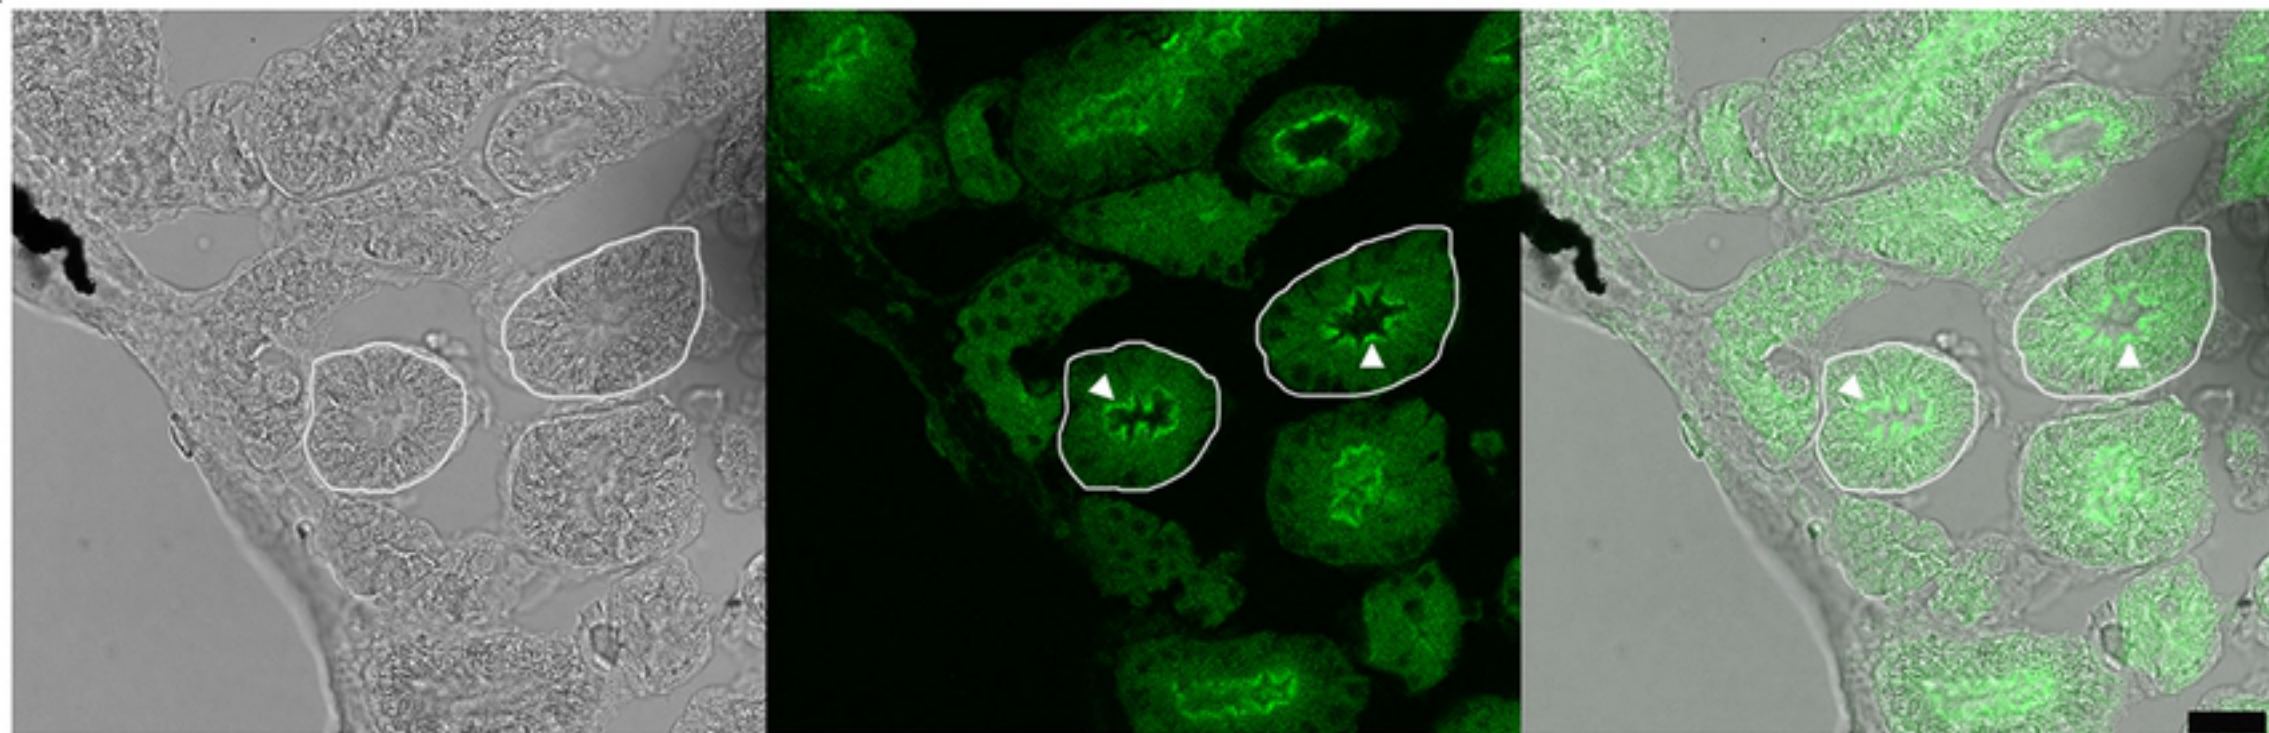

B

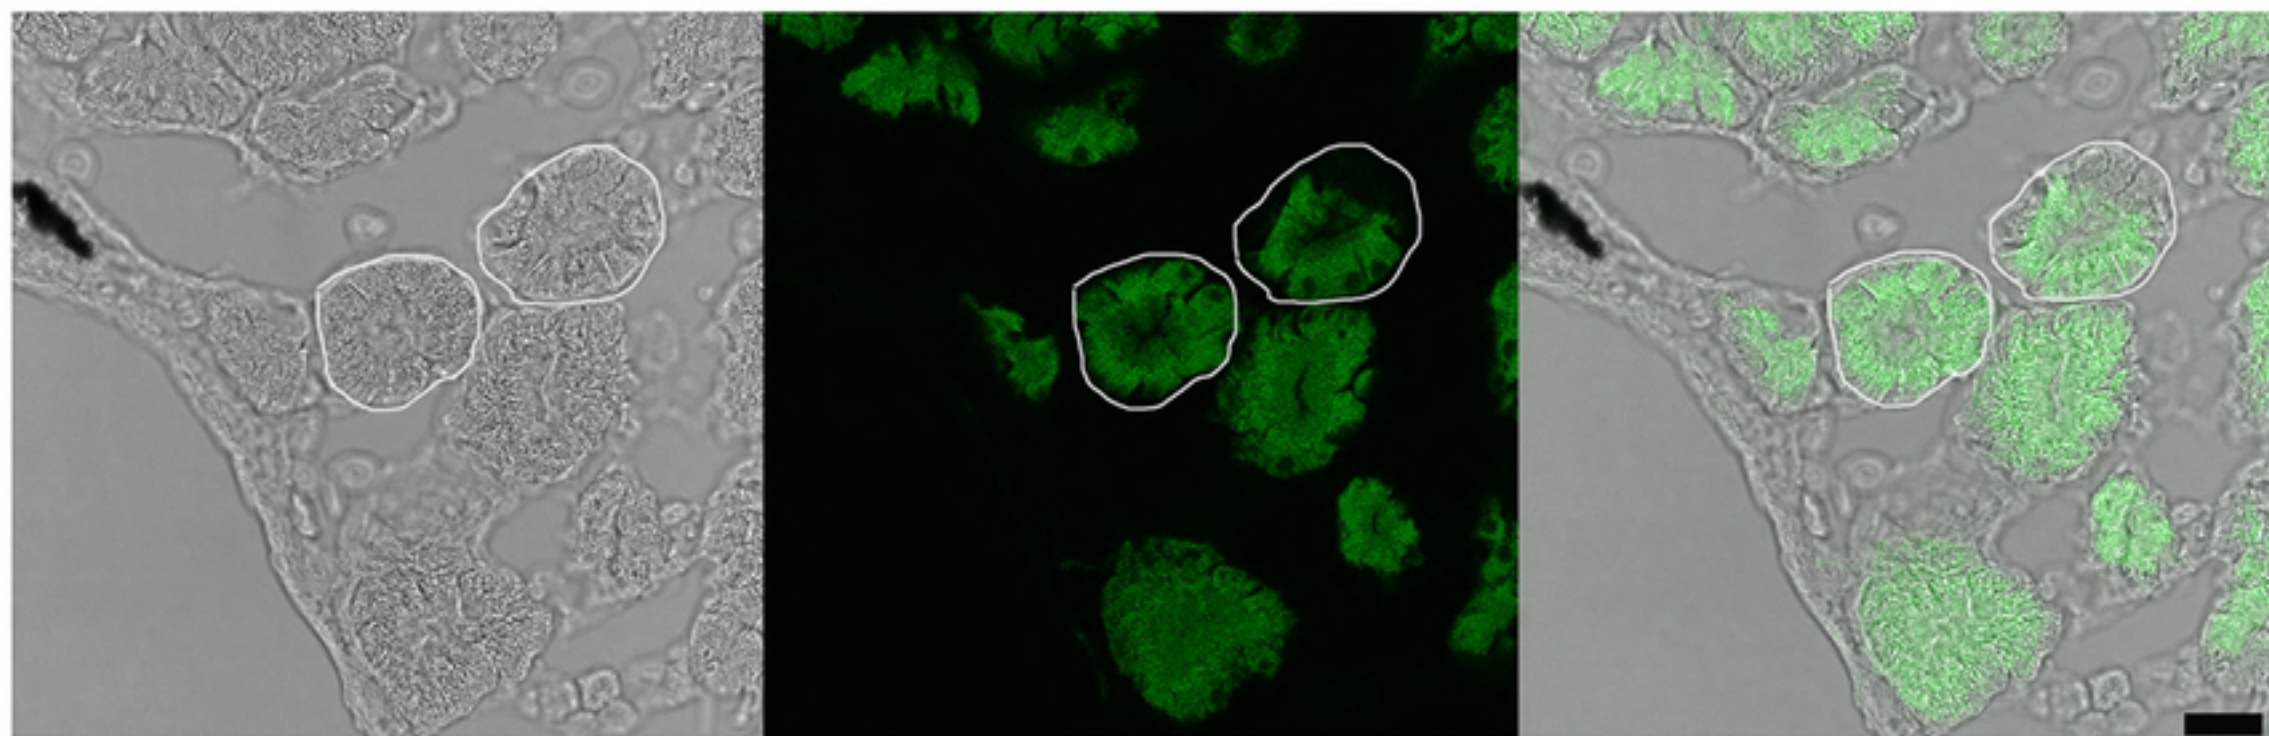

Fig 5



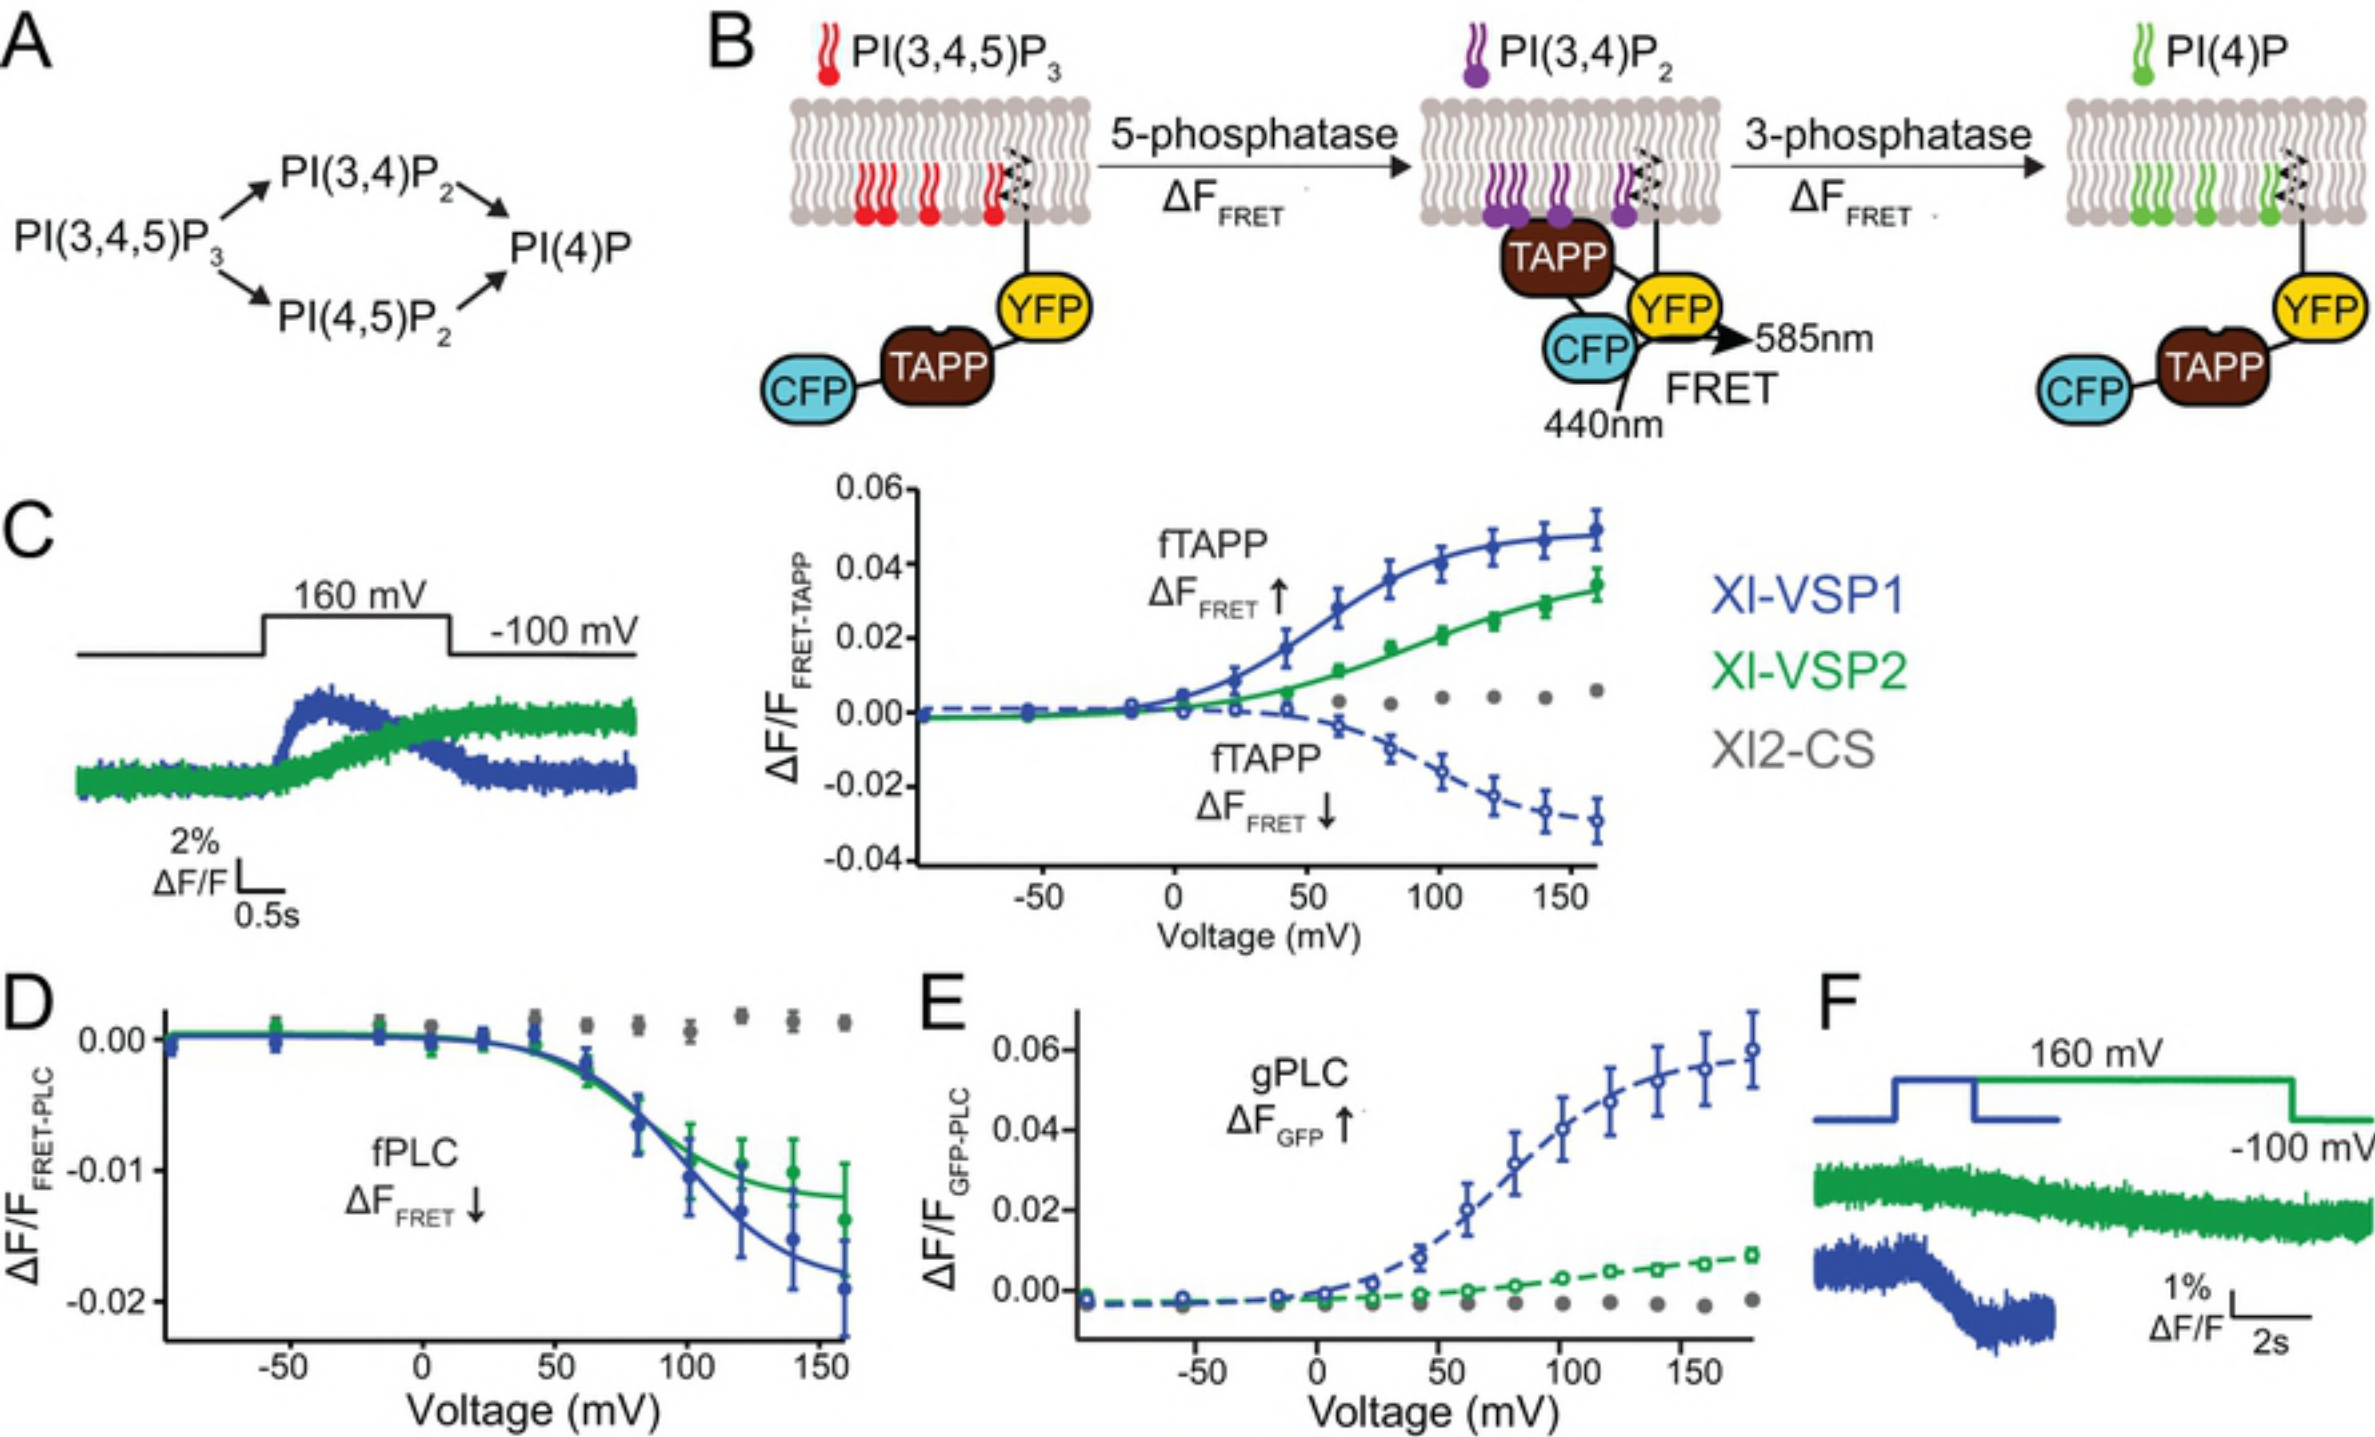

Fig 6

| VSP     | fTAPP |                     |                       | fPLC |                     | gPLC |                       |
|---------|-------|---------------------|-----------------------|------|---------------------|------|-----------------------|
|         | n     | V <sub>1/2</sub> up | V <sub>1/2</sub> down | n    | V <sub>1/2</sub> up | n    | V <sub>1/2</sub> down |
| XI-VSP1 | 10    | 55 ± 2              | 97 ± 3                | 11   | 98 ± 5              | 11   | 77 ± 3                |
| XI-VSP2 | 11    | 92 ± 8              | n/a                   | 11   | 83 ± 6              | 9    | 118 ± 3               |

bioRxiv preprint doi: <https://doi.org/10.1101/483743>; this version posted November 30, 2018. The copyright holder for this preprint (which was not certified by peer review) is the author/funder, who has granted bioRxiv a license to display the preprint in perpetuity. It is made available under aCC-BY 4.0 International license.

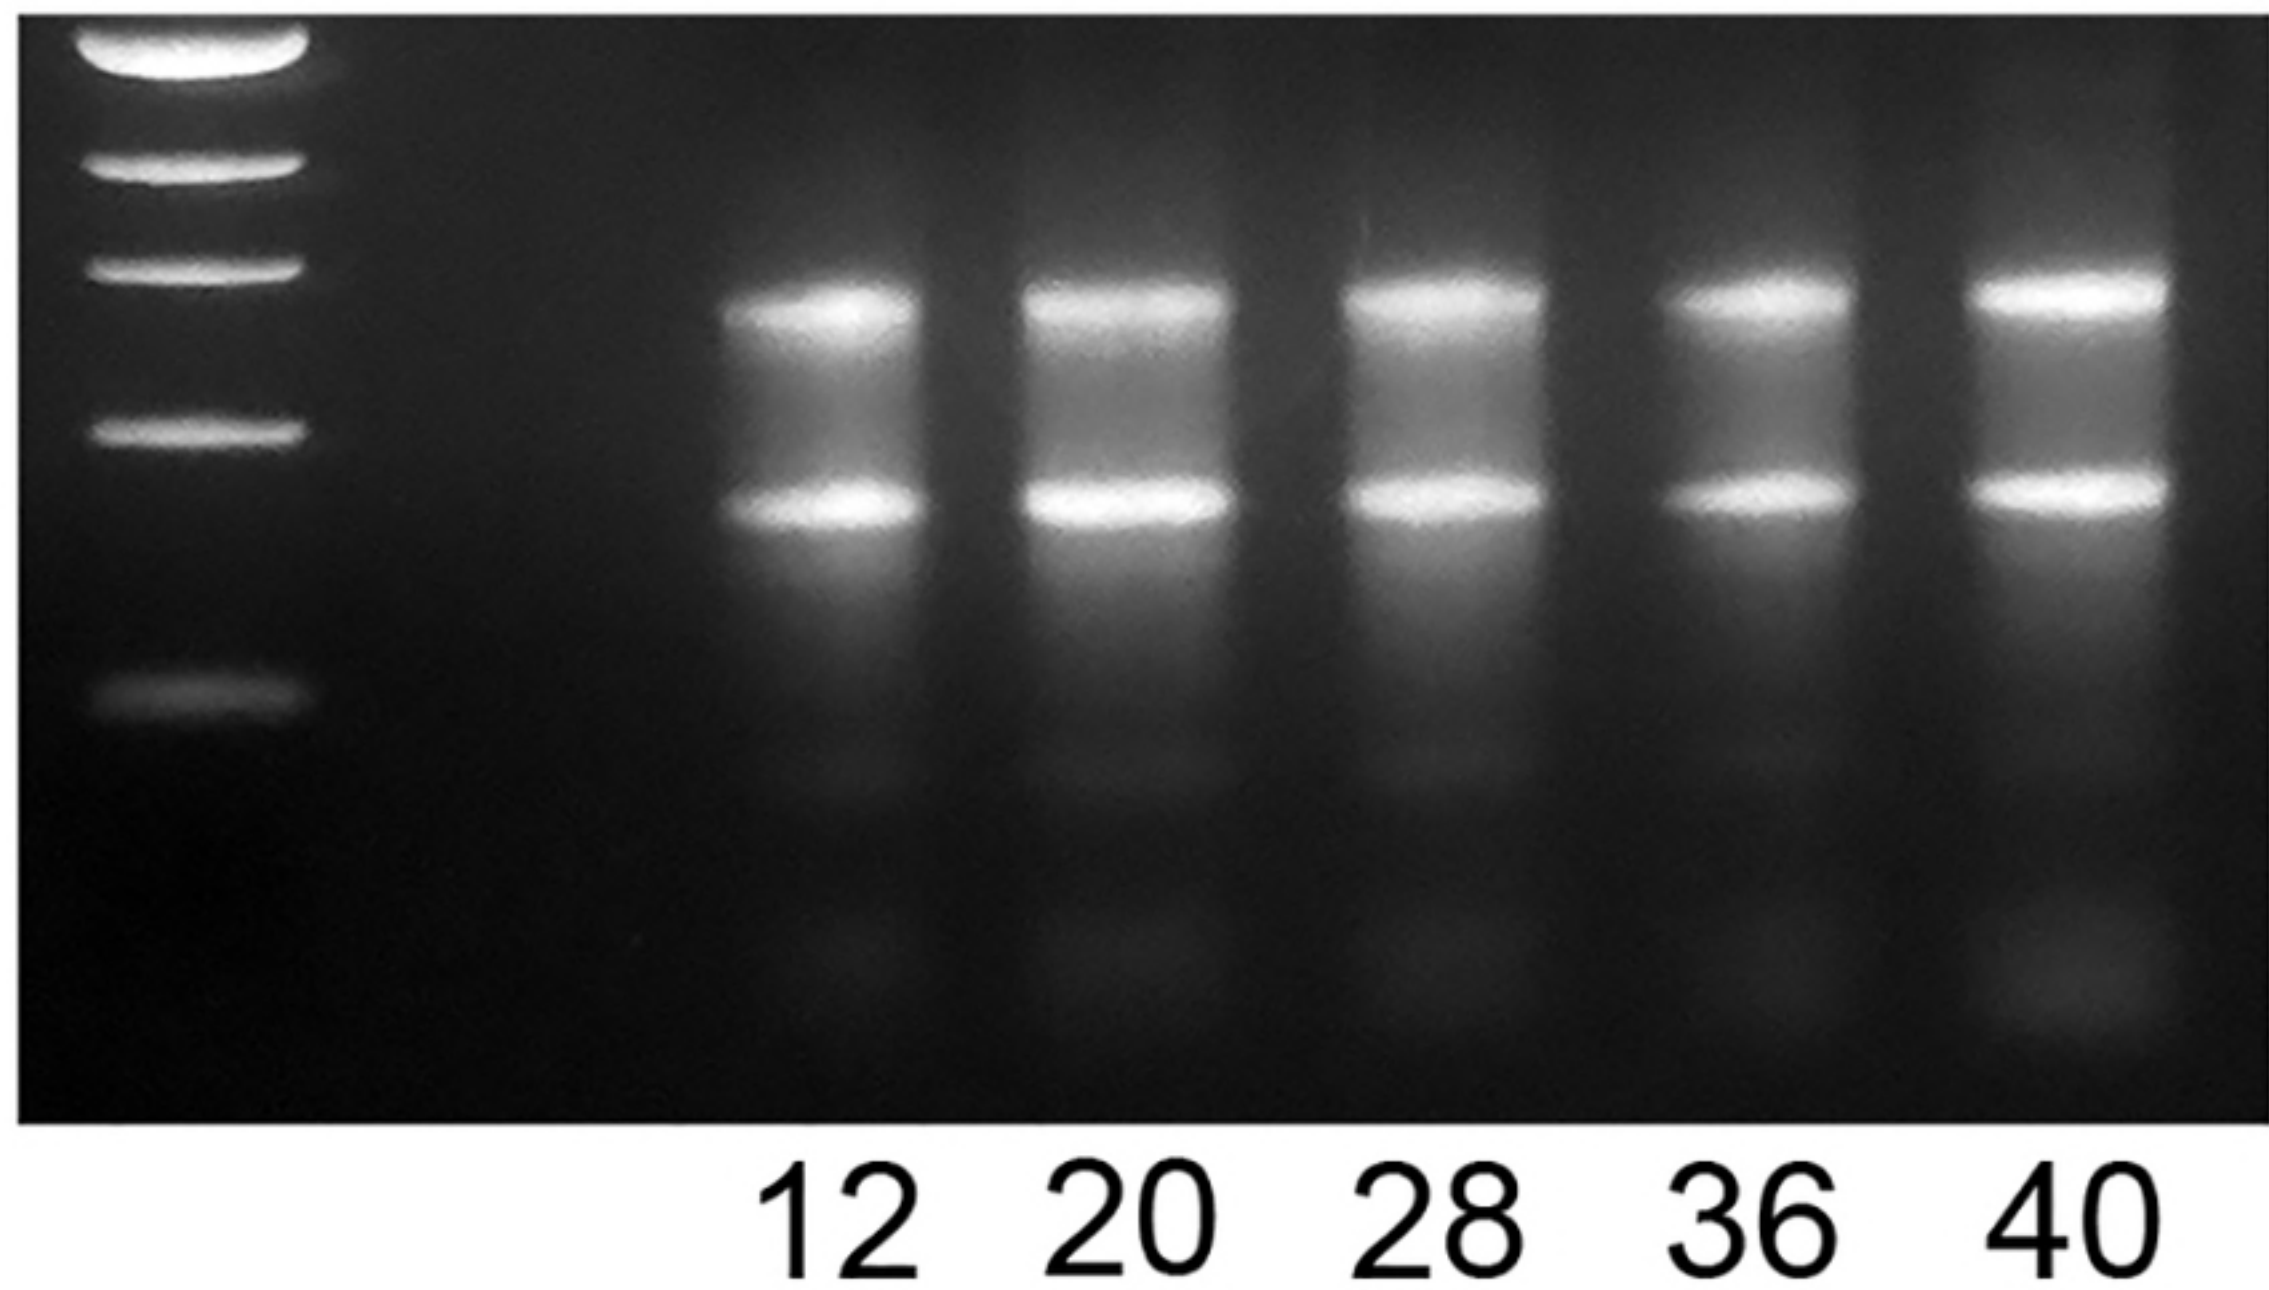

S1 Fig



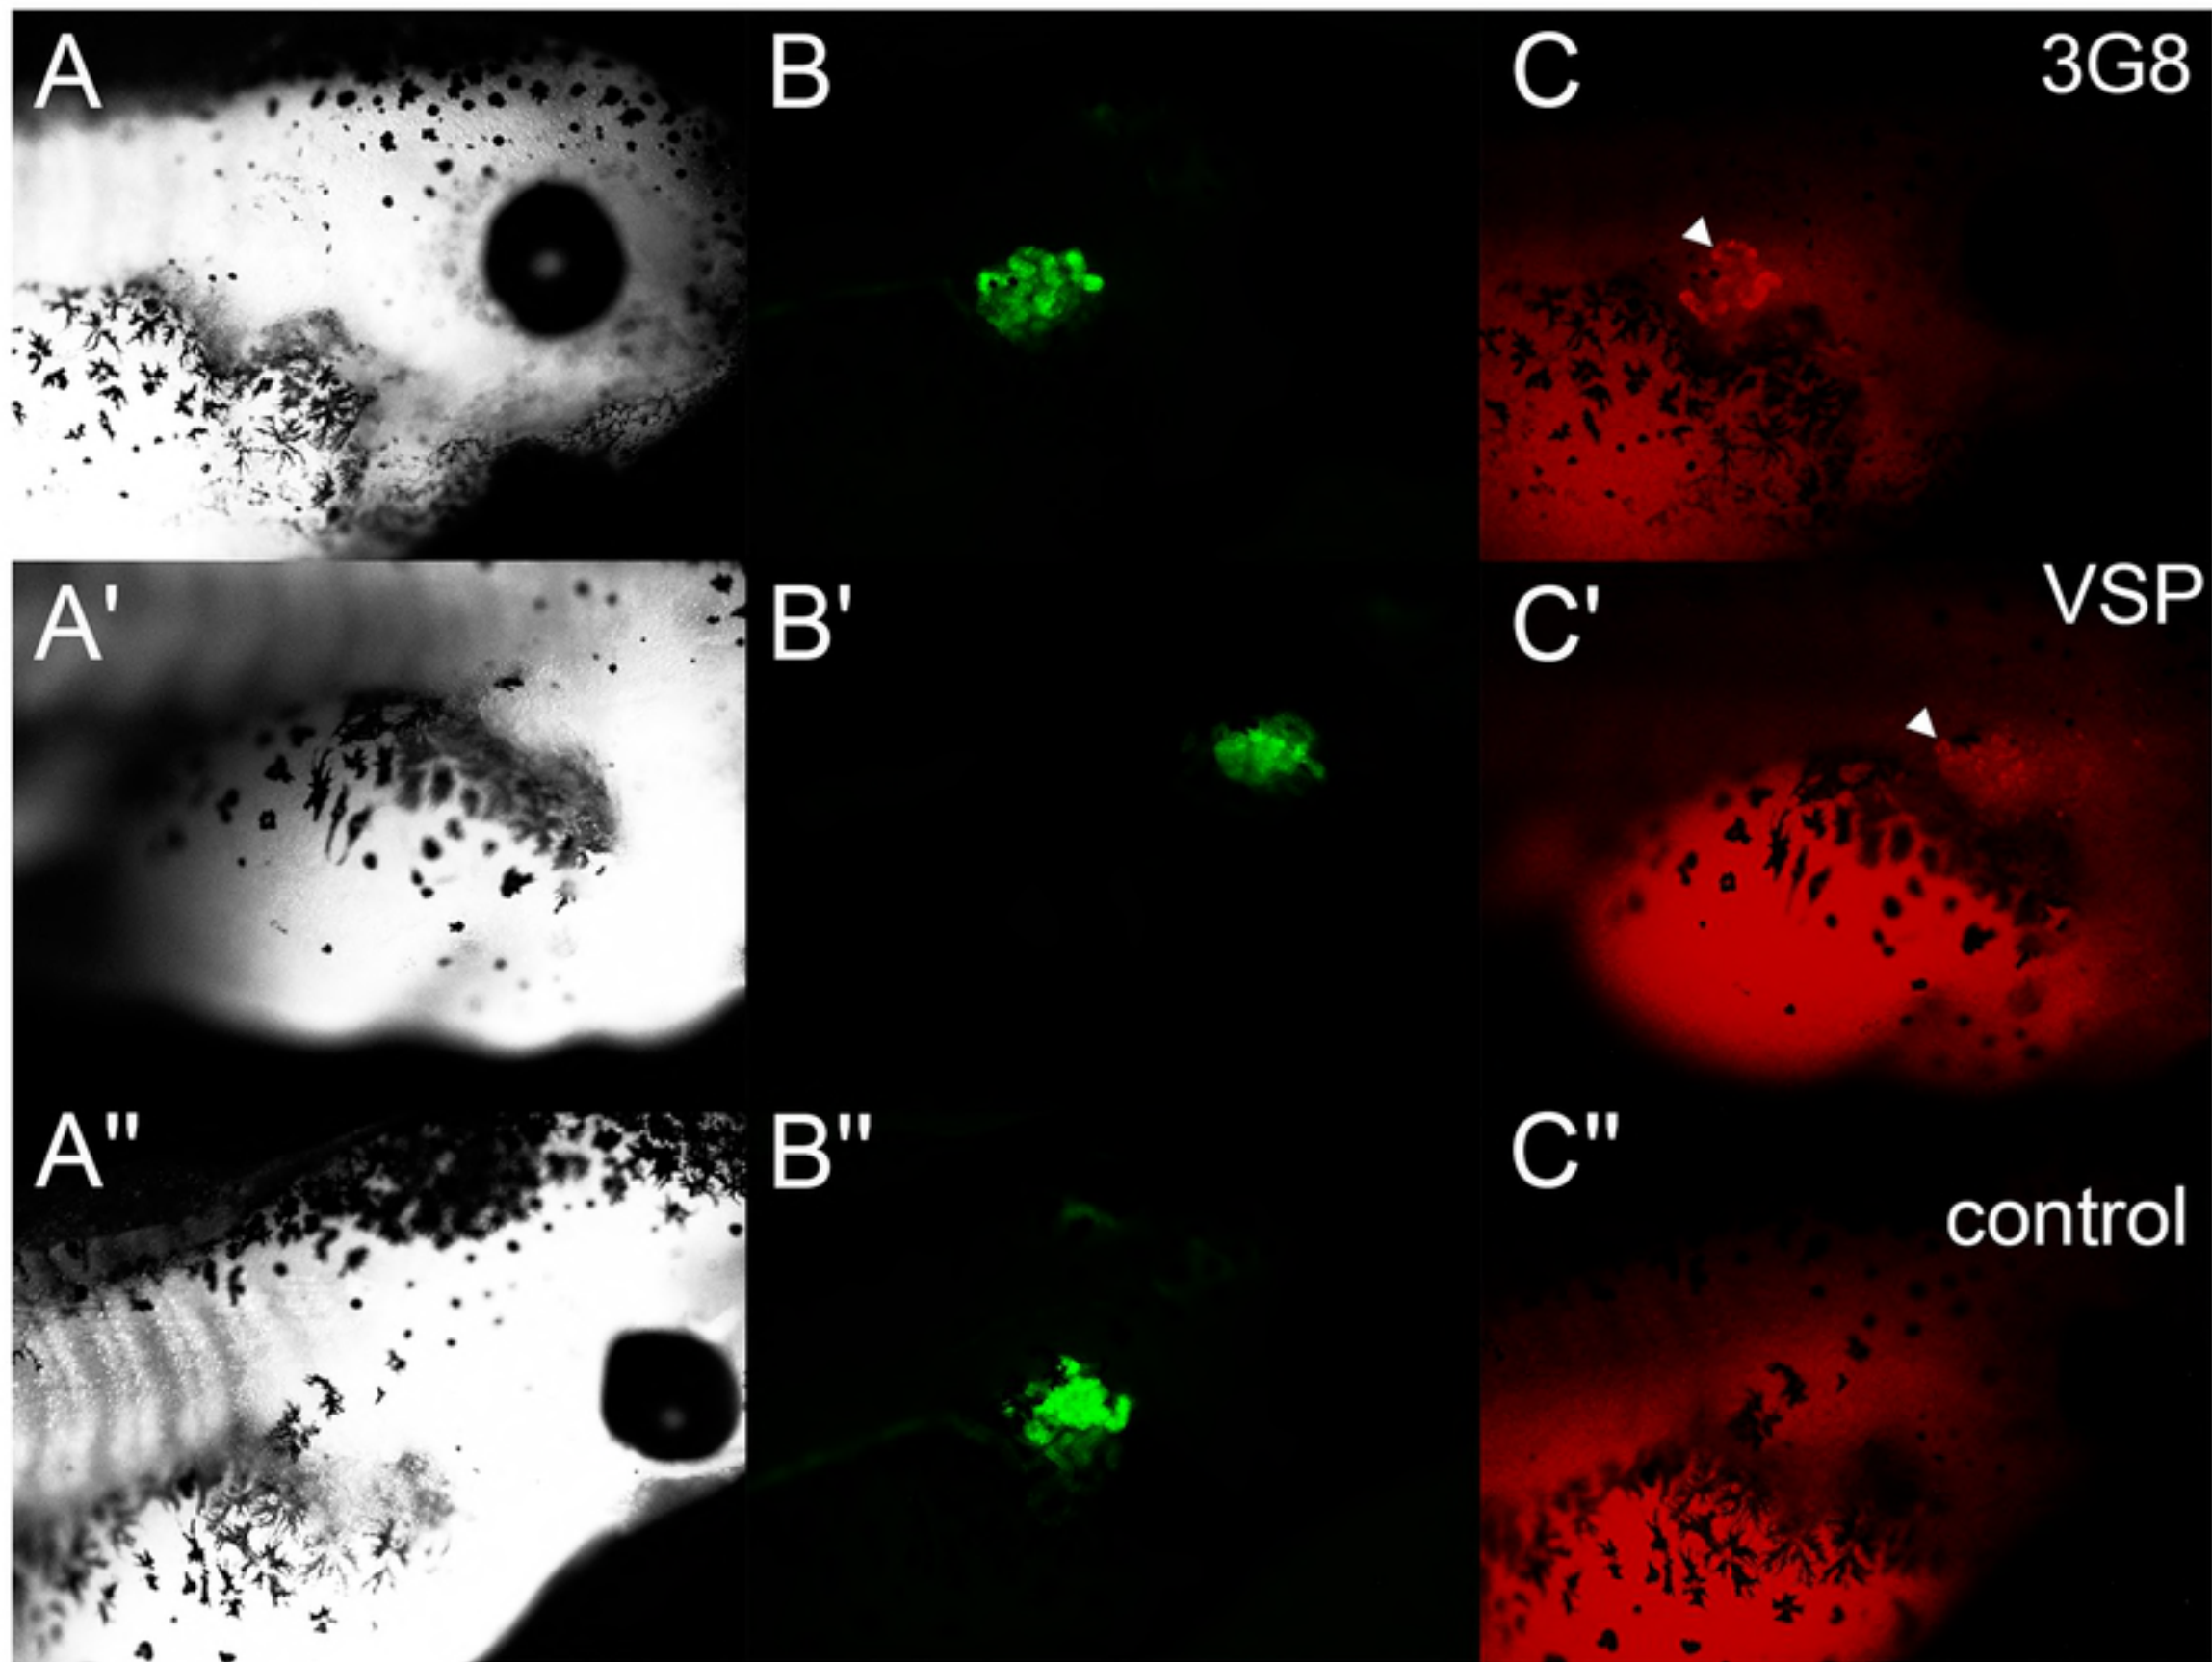

S2 Fig
