1

2 **Full title: The voltage sensing phosphatase (VSP) localizes to the apical membrane of kidney**  
3 **tubule epithelial cells**

4

5

6

7

8

9

10 **Short title: XI-VSP localization in kidney tubules**

11

12

13

14

15 Wil Ratzan<sup>1</sup>, Vamseedhar Rayaprolu<sup>1</sup>, Scott E. Killian<sup>1</sup>, Roger Bradley<sup>1</sup>, and Susy C. Kohout<sup>1</sup>

16 Corresponding author: Susy C. Kohout ([skohout@montana.edu](mailto:skohout@montana.edu))

17 <sup>1</sup>Department of Cell Biology and Neuroscience, Montana State University, Bozeman, MT, USA

## 18 **Abstract**

19 Voltage-sensing phosphatases (VSPs) are transmembrane proteins that couple changes in  
20 membrane potential to hydrolysis of inositol signaling lipids. VSPs catalyze the dephosphorylation of  
21 phosphatidylinositol phosphates (PIPs) that regulate diverse aspects of cell membrane physiology  
22 including cell division, growth and migration. VSPs are highly conserved among chordates, and their  
23 RNA transcripts have been detected in the adult and embryonic stages of frogs, fish, chickens, mice  
24 and humans. However, the subcellular localization and biological function of VSP remains unknown.  
25 Using reverse transcriptase-PCR (RT-PCR), we show that both *Xenopus laevis* VSP (XI-VSP1 and XI-  
26 VSP2) mRNAs are expressed in early embryos, suggesting that both XI-VSPs are involved in early  
27 tadpole development. To understand which embryonic tissues express XI-VSP mRNA, we used *in situ*  
28 hybridization (ISH) and found XI-VSP mRNA in both the brain and kidney of NF stage 32-36 embryos.  
29 By Western blot analysis with a VSP antibody, we show increasing levels of XI-VSP protein in the  
30 developing embryo, and by immunohistochemistry (IHC), we demonstrate that XI-VSP protein is  
31 specifically localized to the apical membrane of both embryonic and adult kidney tubules. We further  
32 characterized the catalytic activity of both XI-VSP homologs and found that while XI-VSP1 catalyzes 3-  
33 and 5-phosphate removal, XI-VSP2 is a less efficient 3-phosphatase with different substrate specificity.  
34 Our results suggest that XI-VSP1 and XI-VSP2 serve different functional roles and that VSPs are an  
35 integral component of voltage-dependent PIP signaling pathways during vertebrate kidney tubule  
36 development and function.

37

## 38 **Introduction**

39 Phosphatidylinositol phosphates (PIPs) are lipid second messengers involved in almost all  
40 facets of cell biology, including differentiation, proliferation, migration, and polarity (1,2). Many human  
41 diseases are linked to mutations in PIP-modifying enzymes, including cancer, peripheral neuropathy,  
42 stroke, bipolar disorder, autism and developmental disorders (3–6). As a result, PIP kinases and

43 phosphatases have been extensively studied to understand their roles in these diverse cellular  
44 processes and are increasingly viewed as potential therapeutic targets (7–9). Here, we focus on an  
45 exceptional member of the PIP-modifying family of enzymes, the voltage-sensing phosphatase (VSP).

46 VSP is a unique PIP-modifying enzyme whose activity is regulated through a voltage sensing  
47 domain (VSD) (10). VSDs are composed of four transmembrane helices with the fourth helix (called S4)  
48 containing arginines responsible for sensing changes in the electrical membrane potential. In response  
49 to membrane depolarizations, the S4 helix changes conformation leading to activation of the cytosolic  
50 phosphatase domain (PD), which is homologous to PTEN (phosphatase and tensin homolog deleted on  
51 chromosome 10) (10), a well characterized lipid phosphatase. Once VSP is activated, its PD  
52 dephosphorylates both the 5- and 3-phosphates from PIPs (10–14). As a result, VSPs provide a direct  
53 connection between the electrical signaling and PIP signaling pathways. While electrical signaling  
54 pathways are most often discussed in terms of neurons, all cells maintain an ionic gradient that creates  
55 a membrane potential. This electrochemical force is utilized to initiate essential cell-signaling functions.  
56 For example, pancreatic beta cells use their membrane potential to respond to increasing glucose  
57 concentrations by activating ATP-sensitive potassium channels and voltage-gated calcium channels to  
58 release insulin (15). Renal tubules also use membrane potentials, specifically activating different  
59 potassium channels for regulating cell volume, potassium secretion and tubuloglomerular feedback  
60 (16). Since many ion channels are regulated by PIPs (17–19), VSPs are likely to play a role in  
61 modulating ion channel permeability and their subsequent electrical signaling when channels and VSP  
62 are co-expressed.

63 In line with the idea that VSP serves a fundamental physiological role, VSP orthologs have been  
64 identified in several tissues across diverse phyla, including ascidians, newts, salamanders, zebrafish,  
65 chicken, amphibians, mice, and humans (10,11,20–26). In particular, VSP mRNA transcripts have been  
66 found in the adult nervous systems of sea squirts and the brains of frogs, mice and humans  
67 (20,22,27,28) as well as in kidney, stomach, heart, testis and ovary (20,22–25,27–30). In addition to  
68 adult tissues, VSP transcripts have been detected in embryonic tissues such as the kidney and eye of

69 zebrafish (31), the kidney, brain and stomach of chicks (21,30), and the brain, spinal cord and eye of  
70 mice (25,27,32). The majority of studies investigating VSP localization focused on measuring mRNA  
71 expression, with a few studies reporting cellular localization of VSP protein. The first report of the sea  
72 squirt VSP (*Ciona intestinalis* VSP, Ci-VSP) found protein expression in sperm tails (10). In chicks,  
73 *Gallus gallus* VSP (Gg-VSP) protein was found in Purkinje neurons throughout the cell, which the  
74 authors suggested means Gg-VSP is expressed on the plasma membrane as well as intracellular  
75 membranes (30). Lastly, mouse VSP (Mm-VSP) was found in the brains of adult and neonatal mice,  
76 specifically in dissociated cortical neurons (32). However, to our knowledge, a connection between VSP  
77 activity and PIP-mediated biological processes in native tissues remains unknown.

78 To better understand VSP's biological role, we tested for XI-VSP localization in *Xenopus laevis*  
79 embryos. *X. laevis* are an allotetraploid species and have two highly similar VSP proteins, termed XI-  
80 VSP1 and XI-VSP2 (22,33). We found the RNA transcripts for both in multiple stages of embryonic  
81 development. The transcript expression patterns differed between the two homologs, suggesting that  
82 they fulfill different biological roles. We validated a new VSP antibody, N432/21 (NeuroMab), which  
83 recognizes both XI-VSPs and shows that XI-VSP protein is expressed in the brain and kidney of adult  
84 and embryonic *X. laevis*. Furthermore, we found that XI-VSP protein is specifically located on the apical  
85 membrane of both embryonic and adult kidney tubules. To probe the function of XI-VSP in these  
86 tubules, we tested the catalytic activity of both XI-VSP homologs. We found that they dephosphorylate  
87 the 5-phosphate from PIPs, but unlike other VSPs, XI-VSP2 is a significantly weaker 3-phosphatase.  
88 From our results, we suggest that by dephosphorylating PIPs in a voltage-dependent manner, XI-VSPs  
89 play a fundamental role in kidney development and function.

90

## 91 **Results**

### 92 **XI-VSP mRNA transcripts in *X. laevis* embryos**

93 The location and function of a biological molecule are often tightly coupled characteristics. Our  
94 previous publication showed adult *X. laevis* transcript expression in several tissues including testes,  
95 kidney, ovary, liver, and brain (22). Although previous studies found VSP transcripts in the embryos of  
96 ascidians (28), fish (31), chicken (21,30) and mice (27), expression in *X. laevis* embryos has not been  
97 reported. To better understand XI-VSP's physiological role, we determined the RNA transcript  
98 expression of XI-VSP1 and 2 during *X. laevis* development. We made polyadenylated cDNA libraries  
99 from the total RNA from Nieuwkoop and Faber (NF) (34) stage 12-40 embryos and conducted semi-  
100 quantitative reverse transcriptase PCR (sqRT-PCR) using XI-VSP1 and XI-VSP2 specific PCR primers.  
101 We found that both XI-VSP1 and 2 transcripts are expressed in the developing embryo and accumulate  
102 by swimming tadpole stages (NF stages >36; Fig 1A-B). Furthermore, we observed a high level of XI-  
103 VSP1 transcripts in early embryos, which are likely remnants of maternal transcripts in agreement with  
104 our previous finding of high level expression of XI-VSP1 in the ovary (Fig 1A) (22). Our results indicate  
105 that both XI-VSP1 and XI-VSP2 transcripts are present at early stages of *X. laevis* development and  
106 that the two show different patterns of embryonic RNA expression. These results agree with our  
107 previous finding that the transcripts are differentially expressed in adult tissues (22) and further suggest  
108 discrete functional roles for each in developing embryos.

109

110 **Fig 1. *X. laevis* embryonic stages show VSP mRNA transcripts expression.**

111 (A-B) Semi-quantitative RT-PCR (sqRT-PCR) of a panel of *X. laevis* embryos (NF stage 12-40) using  
112 PCR primers specific for XI-VSP1 (A) and XI-VSP2 (B). Both XI-VSP1 and XI-VSP2 transcripts appear  
113 to accumulate by stage 36. No bands were seen without reverse transcriptase (not shown). All cDNA  
114 libraries were made with equal amounts of total RNA as determined by spectrophotometry and  
115 confirmed by agarose gel electrophoresis to visualize ribosomal RNA bands (S1 Fig). sqRT-PCR was  
116 repeated at least two times with at least two different embryonic cohorts. The expected PCR amplicon  
117 sizes are 389 bp for XI-VSP1 and 478 bp for XI-VSP2. Shown are representative gels.

118

119 We next localized XI-VSP mRNA in embryos by *in situ* hybridization (ISH). We tested NF stage  
120 32-36 *X. laevis* embryos by ISH with an antisense-stand probe against full-length XI-VSP1 mRNA since  
121 our sqRT-PCR analysis showed accumulation of mRNA expression at those stages. In agreement with  
122 our sqRT-PCR results, we found RNA transcripts in the developing pronephros, brain and brachial  
123 arches (Fig 2A), whereas no staining was seen when using a sense-strand control probe (Fig 2B).  
124 Since XI-VSP1 and XI-VSP2 mRNAs share 93% identity on the nucleotide level, it is possible this  
125 staining is due to transcripts from either XI-VSP1, XI-VSP2, or both.

126

127 **Fig 2. VSP mRNA is located in the pronephros and brain of *X. laevis* embryos. (A) *In situ***  
128 hybridization (ISH) of whole-mount NF stage 32 embryos. An anti-sense probe against XI-VSPs shows  
129 XI-VSP transcript in the proximal pronephritic field (black arrowhead) and brain (white arrowhead) of the  
130 embryos. This probe cannot distinguish between XI-VSP1 and XI-VSP2 mRNAs because of the  
131 similarity between the two transcripts at the nucleotide level (93%). (B) No staining was observed by  
132 ISH in a sibling embryo with a sense control probe. ISH was repeated four times with four different  
133 embryonic cohorts. Shown are representative embryos.

134

## 135 **Validating a VSP antibody**

136 To determine XI-VSP protein expression in tissues, we validated a mouse monoclonal VSP  
137 antibody, N432/21, developed by the NeuroMab facility at the University of California, Davis. We used  
138 *X. laevis* oocytes as a heterologous expression system to determine the specificity of the anti-VSP.  
139 Oocytes were injected with 20 ng of VSP RNAs from different species, incubated for 36 hours before  
140 being lysed, and the lysates were run on SDS-PAGE gels for Western blotting. The anti-VSP N432/21  
141 recognized several species of VSP, including XI-VSP1 (58 kDa), XI-VSP2 (58 kDa), *Xenopus tropicalis*  
142 VSP (Xt-VSP, 58 kDa), FLAG-tagged *Ciona intestinalis* VSP (Ci-VSP, 66 kDa), and *Danio rerio* VSP  
143 (Dr-VSP, 58 kDa) (Fig 3A). XI-VSPs heterologously-expressed in *X. laevis* oocytes often displayed a  
144 double band at their predicted weight (58 kD), with the XI-VSP2 migrating slightly slower through the

145 gel than XI-VSP1 and Xt-VSP (Fig 3A-C). The nature of these doublets and the slight difference in  
146 electrophoretic mobility between XI-VSP1, XI-VSP2, Xt-VSP, and Dr-VSP (despite their nearly identical  
147 predicted MWs) is not presently understood. These results demonstrate that anti-VSP N432/21  
148 recognizes both XI-VSP1 and 2 proteins, as well as the most commonly-studied VSP (Ci-VSP) and  
149 VSPs from two other common vertebrate models of development.

150

151 **Fig 3. *X. laevis* tissues and embryos show VSP protein expression.** (A) Western blot validation of  
152 N432/21 anti-VSP in *X. laevis* oocytes injected with RNA for Dr-VSP (Dr), FLAG-Ci-VSP (Ci), XI-VSP1  
153 (XI1), XI-VSP2 (XI2), Xt-VSP (Xt), or left un-injected (U). All VSPs tested were recognized by the  
154 antibody. Un-injected oocytes (U) display no band. Dr-VSP, XI-VSP1, XI-VSP2 and Xt-VSP have a  
155 predicted MW of 58 kD while FLAG-Ci-VSP has a predicted MW of 66 kD. The slight difference in  
156 electrophoretic mobility between VSPs and their predicted MWs and the nature of the double band for  
157 XI-VSP1 and XI-VSP2 (as seen in panels B and C) has not been determined. These results show that  
158 anti-VSP N432/21 is specific for VSP and cross-reacts with VSPs from multiple species. (B) Western  
159 blot analysis of *X. laevis* tissues. Lysates from adult kidney (K, 3 µg), testis (T, 30 µg), brain (B, 10 µg),  
160 and stage 44 embryo (E, 20 µg) were run against lysates from oocytes injected with RNAs for XI-VSP1  
161 (XI1), XI-VSP2 (XI2) or left un-injected (U) and analyzed by Western blot with anti-VSP. A single band  
162 of approximately the correct MW (58 kD) was observed in the tissue lysates, indicating the presence of  
163 XI-VSP protein in all tissues tested. (C-D) Western blot analysis of *X. laevis* embryos. Lysates from NF  
164 stage 12-40 embryos (30 µg each) were run against lysates from adult kidney (K, 5 µg) and oocytes  
165 injected with RNAs for XI-VSP1 (XI1), XI-VSP2 (XI2) or left un-injected (U). Blots were probed either  
166 with anti-VSP (C) or anti-actin (D) as a loading control (predicted MW 42 kD). A weak band (potentially  
167 corresponding to XI-VSP1) is present only at early embryonic stages 12-20 (red arrowheads), whereas  
168 a slightly slower-migrating band (potentially corresponding to XI-VSP2) accumulates at later embryonic  
169 stages 36-40. Lysates, gels and blots were repeated three times with either three different adults or  
170 three different embryonic cohorts. Shown are representative gels for each.

171

## 172 **Western blots of XI-VSP protein in embryos and adult tissues**

173       After validating the VSP antibody, we turned to tissue samples from adult and embryonic *X.*  
174 *laevis*. Lysates made from adult kidney, testis, brain, and NF stage 44 embryos show a single band of  
175 the correct approximate MW (58 kD) by Western blot, indicating that these tissues express XI-VSPs  
176 (Fig 3B). The anti-VSP N432/21 recognizes both XI-VSP1 and 2 so we cannot definitively distinguish  
177 whether XI-VSP1, XI-VSP2, or both are present. However, their slight difference in electrophoretic  
178 mobility makes it possible to infer that XI-VSP2 is predominantly expressed in the kidney while XI-VSP1  
179 expression may predominate in the testes, further supporting the likelihood of different roles for the two  
180 XI-VSP proteins.

181       Next, we tested for XI-VSP protein expression in *X. laevis* embryos, NF stages 12-40. Western  
182 blots show a faint band at the early embryonic stages, NF 12-20, and darker bands at the later  
183 swimming tadpole stages, NF 36-40 (Fig 3C). Based on the slight electrophoretic differences observed  
184 in the heterologous system, the slightly lower apparent MW faint bands may represent XI-VSP1. The  
185 darker bands have a slightly higher apparent MW, suggesting they represent XI-VSP2. Interestingly,  
186 these results suggest that XI-VSP2 is up-regulated as the tadpole develops. This pattern of XI-VSP  
187 protein levels agrees with the high level of XI-VSP1 maternal transcripts in the ovary (22) and up-  
188 regulation of XI-VSP2 RNA during later developmental stages (Fig 1B). Furthermore, from these blots,  
189 we suggest post-transcriptional regulation of XI-VSP protein expression in the developing embryo since  
190 XI-VSP1 transcripts also are present in later embryonic stages yet are not detectable by Western blot  
191 (Fig 3C). Overall, XI-VSP protein is present in both adult and embryonic *X. laevis*. The differential  
192 protein expression between XI-VSP1 and XI-VSP2 is consistent with the differences observed at the  
193 RNA level and further suggests the two homologs serve different functional roles.

194

## 195 **Immunohistochemistry of XI-VSP proteins in kidney and brain**



196 Since protein accumulation was not detected by immunoblotting until later embryonic stages, we  
197 next used whole-mount indirect IHC on NF stage 42 embryos. Because we observed high RNA and  
198 protein levels in the kidneys, we initially focused on kidney expression for the IHC experiments. To  
199 facilitate kidney identification, we used two transgenic lines that express GFP in the developing kidney,  
200 either Pax8:GFP (35) or Cdh17:GFP (36). Whole-mount immunostained Pax8:GFP embryos showed  
201 distinct XI-VSP staining in the proximal pronephros, indicating XI-VSP protein is present during kidney  
202 development (S2 Fig A-C, A'-C'). This staining was not seen in sibling embryos stained with the  
203 secondary antibody alone (S2 Fig A''-C''). Focusing on the pronephritic tubules, we fixed, embedded,  
204 and sectioned NF stage 42 Cdh17:GFP embryos for IHC to determine subcellular localization of XI-  
205 VSPs (Fig 4A-F). Interestingly, we observed XI-VSP staining in the developing pronephritic tubules,  
206 specifically localized to the luminal surface or apical membrane of the tubules (Fig 4A). This is in  
207 contrast to the soluble GFP marker that is visible throughout the tubules (Fig 4B). Consecutive sections  
208 probed with the secondary antibody alone show the GFP marker without any XI-VSP staining (Fig 4A'-  
209 F'). We also examined embryos for XI-VSP protein in brain tissue, given the presence of XI-VSP RNA  
210 transcripts in embryonic brain (Fig 2A). However, we did not observe any XI-VSP staining in the  
211 developing brain, either in whole-mount or in sections (data not shown). This may be due to XI-VSP  
212 protein levels being too low to visualize via our IHC methods, or due to masking of the epitope during  
213 fixation by XI-VSP binding partners (see discussion). Further studies involving IHC signal amplification  
214 and/or antigen retrieval may be needed to distinguish between these possibilities and to localize XI-  
215 VSP protein in the *X. laevis* brain. Our findings demonstrate embryonic expression of XI-VSP protein in  
216 pronephritic tubules with subcellular localization on their apical membranes, thus, suggesting XI-VSPs  
217 play an important role in the development and function of the embryonic *X. laevis* kidney.

218

219 **Fig 4. XI-VSP protein is expressed on the luminal surface of embryonic pronephroi.** NF stage 42  
220 Cdh17:GFP *X. laevis* embryos were sectioned and stained to test for VSP protein. Kidney tubules were  
221 identified by the presence of the Cdh17:GFP transgene (B, B'). Sections stained with anti-VSP (A)

222 showed fluorescence on the luminal surface (corresponding to the apical membrane) of the proximal  
223 kidney tubule cells (outlined in white). Anti-VSP staining was only observed in the presence of anti-VSP  
224 (A-F) and not in secondary antibody alone control sections (A'-F'). Panels (A, A') anti-VSP or no anti-  
225 VSP control; (B, B') GFP transgene; (C, C') fluorescence signal overlay of A, B and E; (D, D') bright  
226 field images; (E, E') Hoechst 33342 (to mark nuclei); (F, F') signal overlay of A, B, D and E. IHC was  
227 repeated three times with three different embryonic cohorts. Shown are representative sections. Scale  
228 bar = 25  $\mu$ m

229

230 In addition to embryos, we also tested adult kidney tissue using IHC. Adult male *X. laevis*  
231 kidneys were removed, fixed, embedded, sectioned, and stained with anti-VSP. The sections also show  
232 XI-VSP staining on the luminal surface of the tubules (Fig 5A), which is consistent with the subcellular  
233 staining observed in embryonic kidney tubules (Fig 4A). No staining was seen in adult kidney tubules  
234 when consecutive sections were probed with secondary antibody alone (Fig 5B). In contrast to our IHC  
235 of embryonic kidney sections, we only observed staining in adult kidney sections by anti-VSP after  
236 post-fixation antigen retrieval, which suggests a difference in the availability of the VSP antigen in  
237 embryonic versus adult kidney tissues. These results suggest a long-term functional role for XI-VSPs in  
238 the kidney since they are present from the earliest stages of kidney development and continue into  
239 adulthood.

240

241 **Fig 5. XI-VSP protein is expressed on the luminal surface of adult kidney tubule epithelial cells.**

242 (A) Adult kidney sections were stained with anti-VSP and anti-mouse IgG-Alexa 488. XI-VSP staining is  
243 observed on the luminal surface (marked with arrowheads) of the kidney tubules (two outlined in  
244 white). This surface corresponds to the apical membrane and not the basolateral membrane of the  
245 epithelial cells. (B) Apical membrane staining was not seen on a consecutive section in the absence of  
246 anti-VSP primary antibody. IHC was repeated on sections from kidneys of three different adult males.  
247 Shown are representative sections. Scale bar = 25  $\mu$ m

248

## 249 **Functional activity of XI-VSPs**

250 While VSPs from *Ciona intestinalis* and *Danio rerio* function as both 5- and 3-phosphatases (10–  
251 12,14,37) the XI-VSPs have previously been characterized as only a 5-phosphatase against  
252 phosphatidylinositol-4,5-bisphosphate [PI(4,5)P<sub>2</sub>] (22). To understand how the XI-VSPs may contribute  
253 to kidney function, we examined their phosphatase activity to determine whether both XI-VSP1 and 2  
254 dephosphorylate phosphatidylinositol-3,4,5-trisphosphate [PI(3,4,5)P<sub>3</sub>] at the 5-phosphate as well as  
255 whether they function as 3-phosphatases. Because XI-VSPs are regulated by voltage, we used two  
256 electrode voltage clamp (TEVC) to control XI-VSP activation. To monitor all four possible  
257 dephosphorylation reactions (Fig 6A), we turned to pleckstrin homology (PH) domain-based optical  
258 biosensors. PH domains are well known proteins that bind specifically to certain PIPs (38–40). We  
259 chose PH domains from tandem PH domain containing protein 1 (TAPP) and phospholipase C (PLC)  
260 because they bind specifically to phosphatidylinositol-3,4-bisphosphate [PI(3,4)P<sub>2</sub>] and PI(4,5)P<sub>2</sub>,  
261 respectively, allowing us to monitor both 5- and 3-phosphatase activities (12,14,41,42). To follow  
262 PI(3,4)P<sub>2</sub>, we used the biosensor fTAPP that utilizes the PH domain from TAPP flanked by an N-  
263 terminal CFP and C-terminal YFP, while the whole sensor is anchored to the membrane through a  
264 prenylation site at the C-terminus (Fig 6B) (41–43). When VSP dephosphorylates the 5-phosphate from  
265 PI(3,4,5)P<sub>3</sub>, the TAPP-PH domain of the fTAPP biosensor will bind the PI(3,4)P<sub>2</sub> and the resulting  
266 conformational change between the CFP and YFP will change the Förster resonance energy transfer  
267 (FRET) between them, leading to an increase in the FRET ratio (Fig 6B). As PI(3,4)P<sub>2</sub> is depleted when  
268 VSP dephosphorylates the 3-phosphate, the TAPP-PH unbinds and the FRET ratio decreases (Fig 6B).  
269 Thus, we combine the optical measurements of the biosensors with TEVC to precisely control and  
270 monitor catalytic activity of XI-VSPs.

271

272 **Fig 6. XI-VSP1 and XI-VSP2 function as voltage-regulated 5- and 3-phosphatases.** (A) Schematics  
273 of the known VSP reactions. (B) Cartoon representation of fTAPP binding and release with increasing

274 and decreasing PI(3,4)P<sub>2</sub> concentrations. The binding of fTAPP to PI(3,4)P<sub>2</sub> results in a conformational  
275 change that increases the FRET signal. Similarly, a reduction of PI(3,4)P<sub>2</sub> results in a decrease in the  
276 FRET signal. (C) Oocytes were injected with fTAPP and either XI-VSP1, XI-VSP2 or XI-VSP2 C301S  
277 (XI2-CS), a catalytically inactivated protein. (left) Averaged fTAPP FRET traces over time during a  
278 voltage step from a holding potential of -100 to +160 mV. The FRET signal increases and decreases in  
279 the same pulse for XI-VSP1 while it only increases for XI-VSP2. (right) FRET measurements were  
280 tested at several voltages and the  $\Delta F/F$  fTAPP FRET ratio was plotted versus the voltage (RV). The  
281 FRET increase (net 5-phosphatase reaction, solid line, closed symbols) was plotted separately from the  
282 FRET decrease (net 3-phosphatase reaction, dashed line, open symbols). XI-VSP1 shows robust  
283 activity as both a 3- and 5- phosphatase while XI-VSP2 functions as a 5-phosphatase. (D) Oocytes  
284 were injected with fPLC and either XI-VSP1, XI-VSP2 or XI2-CS. The  $\Delta F/F$  fPLC FRET RV shows a  
285 FRET decrease (net 5-phosphatase reaction, solid line, closed symbols) for both XI-VSP1 and 2  
286 indicating both dephosphorylate PI(4,5)P<sub>2</sub>. (E) Oocytes were injected with gPLC and either XI-VSP1,  
287 XI-VSP2 or XI2-CS. GFP fluorescence measurements were tested at several voltages and the  
288 fluorescence voltage relationship plotted showing a fluorescence increase (net 3-phosphatase reaction,  
289 dashed line, open symbols). While XI-VSP1 shows significant levels of 3-phosphatase activity against  
290 PI(3,4,5)P<sub>3</sub>, XI-VSP2 is a much less efficient 3-phosphatase. (F) Averaged fPLC FRET traces over time  
291 during a voltage step from a holding potential of -100 to +160 mV for fPLC co-expressed with either XI-  
292 VSP1 or XI-VSP2. The kinetics of activation are significantly faster for XI-VSP1 than for XI-VSP2. All  
293 error bars are  $\pm$  SEM.,  $n \geq 8$ . Data fit with single Boltzmann equations

294

295 When oocytes co-expressed XI-VSP1 and fTAPP, we observed XI-VSP1 inducing an initial  
296 increase and subsequent decrease in FRET over time, indicating that it functions as both a 5- and a 3-  
297 phosphatase (Fig 6C, left). To determine the voltage dependence of activity, we tested several voltages  
298 and plotted the FRET versus voltage relationships. To better understand each reaction, we separated  
299 the FRET increase from the FRET decrease during our analysis (Fig 6C, right, blue). Note the voltage

300 dependence of the XI-VSP1 5-phosphatase reaction (FRET increase,  $V_{1/2} = 55$  mV) is lower than the  
301 voltage dependence of the 3-phosphatase (FRET decrease,  $V_{1/2} = 97$  mV) (S1 Table). As a control, we  
302 also tested a catalytically inactive XI-VSP2 C301S (XI2-CS) (22) with fTAPP. As expected, a slight,  
303 continuous FRET increase was observed. This small signal is expected because it has been previously  
304 shown that a low level of endogenous XI-VSP activity is present in *X. laevis* oocytes (14,22,41,42,44).  
305 Interestingly, the same fTAPP experiment with XI-VSP2 only showed a FRET increase (Fig 6C, green)  
306 even when we extended the voltage pulse to 60 seconds (data not shown). Additionally, as was  
307 previously reported (22), the voltage dependence of XI-VSP2 5-phosphatase activity against  
308 PI(3,4,5)P<sub>3</sub> is shifted to higher voltages ( $V_{1/2} = 92$  mV) compared to that of XI-VSP1 ( $V_{1/2} = 55$  mV) (S1  
309 Table). These results indicate that, although the XI-VSP homologs are 93% identical, they do not share  
310 identical voltage-dependent functional roles in the cell.

311 To follow PI(4,5)P<sub>2</sub>, we used two different biosensors based on the PLC-PH domain, one FRET  
312 sensor which utilized the PH domain from PLC instead of TAPP to create fPLC, and a fluorescence  
313 sensor where GFP is attached to the N-terminus of PLC, called gPLC. We used fPLC to monitor the 5-  
314 phosphatase activity during the PI(4,5)P<sub>2</sub> to PI(4)P reaction. When oocytes co-expressed either XI-  
315 VSP1 or XI-VSP2 with fPLC, we observed robust FRET ratio decreases (Fig 6D), indicating 5-  
316 phosphatase activity for both homologs, as was previously published (22). We used gPLC to monitor  
317 the 3-phosphatase reaction, the PI(3,4,5)P<sub>3</sub> to PI(4,5)P<sub>2</sub> reaction, because the gPLC sensor is a more  
318 sensitive sensor for this reaction than fPLC. Instead of a change in FRET, the gPLC translocates to the  
319 membrane when PI(4,5)P<sub>2</sub> concentrations increase, resulting in an increase in fluorescence. When  
320 oocytes co-expressed XI-VSP1 with gPLC, we observed an increase in fluorescence, indicating the  
321 production of PI(4,5)P<sub>2</sub> from the XI-VSP 3-phosphatase reaction (Fig 6E, blue). Unexpectedly, the  
322 same experiment with XI-VSP2 also gave a small, but reproducible fluorescence increase (Fig 6E,  
323 green), indicating XI-VSP2 is also able to function as a 3-phosphatase. However, we did not observe  
324 any 3-phosphatase activity when using the fTAPP sensor. These results show that XI-VSP2 can  
325 remove the 3-phosphate from PI(3,4,5)P<sub>3</sub> but not from PI(3,4)P<sub>2</sub>. Further investigations are needed to

326 better understand this striking difference in substrate specificity. Interestingly, the kinetics of XI-VSP2  
327 are significantly slower than the kinetics of XI-VSP1 (Fig 6F), as seen by the voltage steps to 160 mV  
328 for a 2 second voltage step for XI-VSP1 and a 10 second voltage step for XI-VSP2 (Fig 6F). Overall,  
329 our results show that XI-VSP1 can catalyze the same four reactions as other VSPs while XI-VSP2 is  
330 restricted by substrate. Since the reactions and kinetics appear to be different between XI-VSP1 and 2,  
331 they likely fulfill different functional roles in tissues which correlates with their differential expression  
332 patterns.

333

## 334 Discussion

335 VSPs provide a direct link between the electrical state of a cell and its PIP signaling pathways. By  
336 dephosphorylating PIPs in a voltage dependent manner, VSPs could regulate PIP-dependent  
337 processes such as cortical cytoskeleton remodeling, ion channel function, G protein-coupled receptor  
338 signaling (GPCR) and intracellular calcium signaling (18,19,45). Though the biophysical properties of  
339 VSPs have been the subject of intense study since the discovery of Ci-VSP (10), the physiological  
340 relevance of this direct link remains unclear.

341 To elucidate XI-VSPs' biological role, we determined the cellular expression pattern of XI-VSP  
342 RNA and protein in *Xenopus laevis*. We extended our previous findings in adult *X. laevis* tissues (22) by  
343 showing both XI-VSP1 and 2 RNA transcripts in developing embryos. Though VSP is seen in the  
344 embryonic stages of other species, this is the first study showing XI-VSP RNA and protein in *X. laevis*  
345 embryos. Our findings indicate that XI-VSP RNAs are present at early stages of development, NF  
346 stages 12-40, with both XI-VSP1 and 2 RNA levels increasing from NF stage 20 to 40. At the same  
347 stages, we observed an increase in protein levels by Western blot, consistent with our RNA detection,  
348 indicating an upregulation of the protein during development. Using ISH, we observed XI-VSP RNA  
349 transcripts in both the brain and pronephros of NF stage 32-36 embryos. Using IHC, we found XI-VSP  
350 protein in the pronephroi of NF stage 42 embryos. Upon sectioning the embryos, we observed anti-VSP  
351 staining on the luminal surface of the pronephritic tubules, corresponding to the apical membrane of

352 the epithelial cells lining the tubule lumen. Additionally, we sectioned adult kidneys and found the same  
353 apical membrane localization in the tubules. To directly test XI-VSP catalytic activation, we combined  
354 electrophysiology with optical biosensors to show that both XI-VSPs dephosphorylate the 3- and 5-  
355 phosphate from PIPs though with different substrate specificities and efficiencies. Combining our  
356 localization results with our electrophysiological activity data, we suggest that XI-VSPs have specific  
357 functional roles in both the brain and kidney.

358 Concentrating on the kidney, we found XI-VSPs spanning the earliest stages of the developing  
359 pronephros into the full adult kidney, suggesting XI-VSPs modulate PIP concentrations on the apical  
360 membrane of the kidney epithelial cells in a voltage dependent manner. Kidney tubules are lined with  
361 specialized epithelial cells that regulate vertebrate solute homeostasis (46,47). The transepithelial  
362 potential difference across these cells contributes to tubular reabsorption of solutes and water (48,49).  
363 The luminal surface of these epithelial cells are decorated with microvilli and primary cilia, both of  
364 which function in tubular reabsorption by sensing fluid flow (50–54). Microvilli provide a large absorptive  
365 membrane surface for kidney epithelial cells and are actin-dependent dynamic structures with turnover  
366 rates in the tens of minutes (55). Heterologously expressed Gg-VSP influences actin-based  
367 cytoskeleton rearrangements in cultured chick fibroblasts leading to morphological changes in cortical  
368 cell structure (56), suggesting XI-VSPs could modify the actin-based microvilli in kidney epithelial cells.  
369 In addition, GPCR signaling originating in microvilli at the apical membrane of proximal kidney tubules  
370 is directly influenced by local PI(4,5)P<sub>2</sub> concentrations (57), which is a substrate for both XI-VSPs.  
371 Likewise, primary cilia are dependent on local PI(4,5)P<sub>2</sub> concentrations (58), and importantly, trigger  
372 calcium entry due to the mechanical forces from the fluid flow (54). As calcium enters the cells, the  
373 resulting depolarization could lead to activation of the XI-VSP on the apical membrane and subsequent  
374 regulation of the cortical cytoskeleton, GPCRs, and ion channels during renal tubule development and  
375 adult renal function.

376 Our results are consistent with VSP homologs having a broad role in multiple tissues.  
377 Specifically, our study agrees with previous studies that also showed embryonic kidney tubule

378 expression of VSP in zebrafish (31), and chicks (21). In particular, Gg-VSP RNA was found on the  
379 proximal part of the nephrogenic tubules of HH stage 26 chicks and not the distal or collecting tubules,  
380 consistent with our IHC results showing proximal tubule localization in NF stage 32 embryos (S2 Fig).  
381 Our findings in *X. laevis* are also consistent with the findings in chicks in that not all tubules appear to  
382 immunostain with our VSP antibody, indicating that the XI-VSPs may be restricted to a functional  
383 subset of the developing and adult kidney. Our results go further because we observe clear XI-VSP  
384 protein immunostaining on the apical membrane of the tubules where reabsorption of nutrients occurs  
385 and where PIP-mediated signaling originates.

386 Not all VSP studies analyzed kidney expression patterns. The human VSP, Hs-VSP1  
387 (previously called TPIP and TPTE2), was not examined in kidneys, making human VSP kidney  
388 expression unknown (20). In addition to kidney expression, VSP is also expressed in the brain and  
389 nervous system of multiple species (20,22,28,30,32). Indeed, we observed XI-VSP RNA transcripts and  
390 protein in the brain of adult and embryonic *X. laevis*. Some reports of VSP expression conflict,  
391 particularly regarding expression of mouse VSP, Mm-VSP (previously called PTEN2). Early studies  
392 identified Mm-VSP as a testis specific protein (25) while subsequent investigations report expression in  
393 the brain (32). While more research is needed, a pattern is emerging with the kidney and brain being  
394 the most consistent tissues expressing VSP. Our results support this pattern and a functional role for  
395 VSP in both the brain and kidney of multiple vertebrate species.

396 The subcellular localization of VSP is also debated in the field. Prior studies of native VSP protein  
397 have found VSP on the plasma membrane of ascidian sperm (10) and of Purkinje neurons in chick  
398 cerebellum sections (30). Along with plasma membrane localization, however, the cerebellum sections  
399 also showed intracellular staining with a Gg-VSP antibody. A more recent study in mice used  
400 dissociated cortical neurons from P0-1 mice and the staining appears throughout the cells (32). In  
401 addition, heterologous expression of mouse and human VSP consistently show intracellular membrane  
402 localizations (20,25,29). In contrast, our subcellular localization of endogenous XI-VSP protein is on the  
403 apical membrane of kidney tubule epithelia. The differences in our results and those from prior studies



404 may lie in the tissues tested, the antigen retrieval discussed below, or in the antibodies used. Further  
405 experiments are needed to determine whether VSPs function on both intracellular and plasma  
406 membranes. While not tested against either chicken or mouse VSPs, our antibody does cross react  
407 with VSPs from *D. rerio*, *X. tropicalis* and *C. intestinalis*. As a result, N432/21 may prove to be an  
408 invaluable tool in future studies of VSP's physiological role in vertebrate kidney development and neural  
409 function.

410 It is interesting to note that unlike in fixed embryonic kidney tissue, we only observed staining of  
411 adult kidney tissue after post-fixation antigen retrieval. This difference in VSP epitope availability could  
412 be due to different roles for VSP in adult versus embryonic kidney tubules, and differential VSP binding  
413 partners in these tissues. We recently demonstrated that Ci-VSP forms dimers (42). Since the two XI-  
414 VSP homologs shown here display different expression in the embryo and adult frog, it is also possible  
415 that the difference we observed in VSP epitope availability is due to the presence of XI-VSP  
416 homodimers and heterodimers.

417 In addition to our localization experiments, we also tested the electrophysiological characteristics  
418 of both XI-VSP homologs. We controlled their activation using TEVC and monitored the production and  
419 depletion of different PIPs using optical biosensors. Our previous report indicated that both homologs  
420 catalyzed the dephosphorylation of the 5-phosphate from  $PI(4,5)P_2$ . VSPs from other species have  
421 been shown to utilize  $PI(3,4,5)P_3$  and  $PI(3,4)P_2$  as substrates as well. Here, we tested all three  
422 substrates by using PIP sensors that are sensitive to either  $PI(3,4)P_2$  or  $PI(4,5)P_2$  concentrations  
423 (TAPP-PH or PLC-PH respectively), allowing us to monitor the 3-phosphate removal from  $PI(3,4,5)P_3$   
424 and  $PI(3,4)P_2$  as well as the 5-phosphate removal from  $PI(3,4,5)P_3$  and  $PI(4,5)P_2$ . We found that XI-  
425 VSP1 behaves much like other VSPs in that it dephosphorylates both 5- and 3-phosphates. XI-VSP2,  
426 on the other hand, is a slower 5-phosphatase and a weaker 3-phosphatase. After modifying our  
427 protocols for longer depolarizations to account for the slower kinetics, we observed clear 5-  
428 phosphatase activity for XI-VSP2 using both fTAPP and fPLC sensors. The voltage-dependence of  
429 activation was shifted to higher voltages for XI-VSP2 compared to XI-VSP1. We also observed 3-

430 phosphatase activity of XI-VSP2 against PI(3,4,5)P<sub>3</sub>, but not against PI(3,4)P<sub>2</sub>, even after a one minute  
431 depolarization. This difference between the XI-VSP homologs further indicates that the two are not  
432 interchangeable and serve different physiological roles in the cell.

433 In conclusion, we observe XI-VSP expression in the brain and kidney of *X. laevis* embryos and  
434 adults. We localize XI-VSP protein on the apical membrane of kidney tubule epithelial cells, and we  
435 characterize both XI-VSPs as 3- and 5- phosphatases with different enzymatic activities. Our results  
436 indicate a role for voltage-dependent dephosphorylation of both 5- and 3-phosphates from PIPs on the  
437 apical membrane during kidney tubule development and renal function.

438

## 439 **Materials and methods**

### 440 **Materials**

441 *Ciona intestinalis* VSP (Ci-VSP, NM\_001033826) and *Danio rerio* VSP (Dr-VSP,  
442 NM\_001025458) plasmids were kindly provided by Y. Okamura (Osaka University, Osaka, Japan). *X.*  
443 *laevis* VSP1 (XI-VSP1, NM\_001096603), *X. laevis* VSP2 (XI-VSP2, NM\_001280607), and *X. tropicalis*  
444 VSP (Xt-VSP, NM\_001015951) expression plasmids were made in Laurinda Jaffe's laboratory and are  
445 available through Addgene (Cambridge, MA). While the original human gene was named  
446 transmembrane phosphatase with tensin homology (TPTE), the majority of the literature refer to this  
447 protein as the voltage sensing phosphatase or VSP. Here, we follow this more common nomenclature  
448 to avoid confusion. fPLC and fTAPP were both kindly provided by E.Y. Isacoff (University of California,  
449 Berkeley). GFP-PLC-PH was kindly provided by T. Meyer (Stanford University). Mutations and epitope  
450 tags were created by site-directed mutagenesis with Pfu Turbo DNA polymerase (Agilent, Santa Clara,  
451 CA) by standard protocols. All DNA constructs were confirmed by sequencing. cRNA was transcribed  
452 using SP6 or T7 mMessage mMachin kits (Thermo-Fisher, Waltham, MA). *X. laevis* oocytes for XI-  
453 VSP activity assays were purchased from Xenopus 1 (Dexter, MI). Mouse monoclonal anti-VSP  
454 (N432/21; RRID:AB\_2716253) was made by the UC Davis/NIH NeuroMab Facility and is available

455 through Antibodies Incorporated (Davis, CA). Anti-beta actin (clone C4, catalog # sc-47778) was  
456 purchased from Santa Cruz Biotechnology (Dallas, TX). 3G8.2C11 antibody was obtained from the  
457 European Xenopus Resource Centre (59,60). Goat anti-mouse IgG, light chain specific, conjugated to  
458 horseradish peroxidase (HRP, catalog # 115-035-174) was purchased from Jackson ImmunoResearch  
459 (West Grove, PA). Goat anti-mouse IgG conjugated to Alexa Fluor 488 or Alexa Fluor 594 was  
460 purchased from Thermo Fisher. Anti-digoxigenin (DIG) conjugated to alkaline phosphatase (AP) was  
461 purchased from Sigma-Aldrich (St. Louis, MO). Cdh17:GFP and Pax8:GFP transgenic *Xenopus laevis*  
462 frogs were obtained through the National Xenopus Resource (Woods Hole, MA, RRID:SCR\_013731)  
463 (35,36,60). All animals in this study were used in accordance with protocols approved by the Montana  
464 State University IACUC.

465

## 466 **Reverse-transcriptase PCR**

467 Total RNA was isolated from embryos with TRIzol (Thermo Fisher), quantitated by Nanodrop  
468 spectrophotometry and analyzed by ethidium bromide agarose gel electrophoresis (S1 Fig). Two µg of  
469 embryo RNA was treated with DNase I (DNA-free, Thermo Fisher) to remove genomic DNA and  
470 cDNAs were reverse-transcribed by priming with oligo-dT using SuperScript IV reverse transcriptase  
471 (Thermo Fisher). A parallel control reaction was performed without reverse-transcriptase for each  
472 DNase I-treated RNA. Semi-quantitative PCR was performed on 1/20<sup>th</sup> of the resulting cDNA using  
473 primers for XI-VSP1 (forward: GATGCTGGAAACAACCTCCATAGTCC; reverse:  
474 GCTGTGTATGTGGTCAGAACAC) or XI-VSP2 (forward: GATGCTGGGAACAATTCCGTAGTCA;  
475 reverse: GGGTAATAGTACGTTAAGAAGTG) with Taq polymerase in Standard Taq PCR buffer (New  
476 England Biolabs, Ipswich, MA) with the thermocycling parameters: 95°C for 30 sec, 37 cycles of 62°C  
477 for 20 seconds followed by 68°C for 30 seconds. For each primer pair the forward primer is located  
478 upstream of an intron and the reverse primer is located in the 3' UTR to ensure allele specificity and  
479 amplification of only cDNA. PCR products were analyzed by ethidium bromide agarose gel  
480 electrophoresis.

481

## 482 ***In-situ* hybridization (ISH)**

483 Full-length antisense and sense digoxigenin (DIG)-labeled probes were made from linearized  
484 pcDNA3-XI-VSP1 plasmid with SP6 or T7 RNA polymerase and DIG NTPs (Sigma-Aldrich). *In situ*  
485 hybridization to detect XI-VSP mRNAs was performed on NF stage 32-36 embryos fixed for 90 minutes  
486 in phosphate-buffered 4% paraformaldehyde (pH 7.4) by standard methods (61). Embryos were  
487 probed with anti-DIG IgG-AP, stained with NBT-BCIP (Sigma-Aldrich) and imaged with a ProgRes  
488 C14plus camera (Jenoptic, Germany) through a 5x objective on an Axioscope.A1 microscope (Zeiss,  
489 Germany).

490

## 491 **Defolliculating *X. laevis* oocytes**

492 *X. laevis* ovaries were purchased from Xenopus 1 (Dexter, MI). Ovaries were processed as  
493 described previously (62). Briefly, each ovary was washed once and morselized in Ca<sup>2+</sup>-free (96 mM  
494 NaCl, 2 mM KCl, 1 mM MgCl<sub>2</sub>, and 10 mM HEPES, pH 7.6). The morselized ovary was washed in Ca<sup>2+</sup>-  
495 free to remove yolk from lysed oocytes and then digested at room temperature for 30-45 minutes in 2%  
496 collagenase (Sigma-Aldrich, catalog # C-0130), 0.1% soybean trypsin inhibitor (Sigma-Aldrich, catalog  
497 # T-9003), and 0.1% BSA (Sigma-Aldrich, catalog # A3294) made in Ca<sup>2+</sup>-free. Post-digestion, the  
498 oocytes were washed in oocyte wash buffer (34 mM KH<sub>2</sub>PO<sub>4</sub>, 66 mM K<sub>2</sub>HPO<sub>4</sub>, 0.1% BSA, pH 6.5) at  
499 least 10 times to remove follicles, followed by 10 washes with Ca<sup>2+</sup>-free. The oocytes were then sorted  
500 into ND-96 (96 mM NaCl, 2 mM KCl, 1.8 mM CaCl<sub>2</sub>, 1 mM MgCl<sub>2</sub>, 50 mg/ml gentamicin, 2.5 mM  
501 sodium pyruvate, and 10 mM HEPES, pH 7.6) and cultured at 18°C.

502

## 503 **Western Blotting**

504 Adult *Xenopus laevis* tissue, oocyte, and embryo lysates were made by homogenization and brief  
505 sonication in lysis buffer (150 mM NaCl, 150 mM dithiothreitol, 0.1% CHAPS, 50 mM Tris, pH 7.4) with

506 protease inhibitors (Roche, Switzerland). *X. laevis* oocytes were injected with 20 ng VSP RNA and  
507 cultured at 18°C for 36 hours before lysis. Protein concentrations were determined by a Quick Start  
508 Bradford assay (Bio-Rad, Hercules, CA). Lysates were run on 10% polyacrylamide gels at 200 volts for  
509 one hour, transferred to ProTran nitrocellulose membranes (GE Healthcare, Chicago, IL) in sodium  
510 borate transfer buffer for 70 minutes at 350 mA and stained with Ponceau-S to evaluate equal loading  
511 of protein between the wells. Membranes were blocked in TBS-T block buffer (5% non-fat dry milk, 150  
512 mM NaCl, 10 mM, 0.1% Tween-80, 10 mM Tris, pH 7.4) and probed with anti-VSP supernatant at 1:25  
513 dilution or anti-beta actin at 1:500 dilution. Blots were then washed in TBS-T, probed with anti-mouse  
514 IgG-HRP and developed with ECL reagent (Sycamore Life Sciences, Houston, TX).

515

## 516 Immunohistochemistry (IHC)

517 Adult *Xenopus laevis* kidneys and NF stage 40-42 embryos (34) were fixed in phosphate-  
518 buffered 4% paraformaldehyde (pH 7.4) for 90 minutes followed by sequential equilibration for two  
519 hours each in 30% sucrose, 30% sucrose/50% O.C.T (Optimal Cutting Temperature) embedding media  
520 (Fisher, Hampton, NH), and 100% OCT. Kidney tissues were then snap-frozen in OCT using a dry  
521 ice/ethanol slurry and sectioned at 14 µm onto glass slides coated with 0.5% porcine gelatin, type A  
522 (Sigma-Aldrich, catalog # G2500) and 0.05% chromium potassium sulfate. Sections were air-dried  
523 overnight at room-temperature and stored at -80°C. Sections were rehydrated with phosphate-buffered  
524 saline (PBS; 137 mM NaCl, 27 mM KCl, 100 mM Na<sub>2</sub>HPO<sub>4</sub>, 18 mM KH<sub>2</sub>PO<sub>4</sub>, pH 7.4) and subjected to  
525 antigen retrieval in 10 mM sodium citrate, 0.05 % Tween-80, pH 6.0 for 20 minutes at 95°C followed by  
526 quick cooling on ice. Sections were re-equilibrated with PBS-T (0.1% Triton X-100) and blocked in  
527 PBS-T with 10% normal goat serum (Fisher, catalog # 16-210-064). Sections were probed with anti-  
528 VSP supernatant at 1:25 dilution, washed in PBS-T, and probed with anti-mouse IgG-Alexa Fluor 488  
529 or anti-mouse IgG-Alexa Fluor 594 at 1:1000 dilution with 1 µg/mL Hoechst 33342 (Thermo-Fisher) to  
530 stain nuclei. Immuno-stained sections were mounted in Vectashield (Vector Labs, UK) under glass  
531 coverslips and imaged with a 63x/1.4 NA objective on a Leica SP8 confocal microscope (Leica, Buffalo

532 Grove, IL). Embryo sections were similarly fixed, sectioned, stained and imaged without the antigen  
533 retrieval process. Whole-mount embryos were similarly fixed and stained without the antigen retrieval  
534 process and with four hours to overnight incubations to allow for antibody penetration. Whole-mount  
535 IHC images were captured using Progres Mac CapturePro software on a ProgRes C14plus camera  
536 through a Zeiss Plan-neofluar 5x/0.16 NA objective on an Axioscope.A1 microscope. GFP or Alexa  
537 Fluor 594 fluorescence in whole-mount immuno-stained embryos was excited by an LED and collected  
538 through Zeiss FITC (EX BP 475/40, BS FT 500, EM BP 530/50) or Texas Red (EX BP 560/40, BS FT  
539 585, EM BP 630/75) filter sets, respectively. Anti-VSP, anti-3G8 and matching secondary-alone control  
540 samples were imaged using the same excitation intensity and digital gain. IHC was repeated a total of  
541 three times with tissue from different animals or clutches of embryos.

542

## 543 **Electrophysiology and fluorescence measurement of activity**

544 Two electrode voltage clamp (TEVC) was performed as previously described (14). FRET-based  
545 PIP sensors (41,42) were used to measure depletion of PI(4,5)P<sub>2</sub> or the production and depletion of  
546 PI(3,4)P<sub>2</sub>. The PIP sensors were designed by adding an N-terminal CFP and a C-terminal YFP to  
547 pleckstrin homology (PH) domains. The PH domains were originally derived from phospholipase C  
548 (PLC) for PI(4,5)P<sub>2</sub> and the tandem PH domain containing protein 1 (TAPP) for PI(3,4)P<sub>2</sub>, and hence  
549 were called fPLC and fTAPP respectively. To measure production of PI(4,5)P<sub>2</sub>, the diffusion based  
550 sensor GFP-PLC (gPLC) was used which has a GFP was attached to the N-terminus of the PLC-PH  
551 domain. All XI-VSP cRNAs (0.8 µg/µl) were mixed with either fPLC cRNA (0.4 µg/µl), fTAPP cRNA (0.4  
552 µg/µl) or gPLC cRNA (0.06 µg/µl) and injected into *X. laevis* oocytes. In all experiments, 50 nl of the  
553 cRNA mixtures were injected into oocytes and incubated in ND-96 for 30-40 hours. On the day of the  
554 experiments, cells were transferred from ND-96 to ND-96' (ND-96 without gentamicin and sodium  
555 pyruvate) containing 8 µM insulin to promote PI3 kinase activity and up-regulate PI(3,4,5)P<sub>3</sub> levels.

556 A Leica DM IRBE inverted microscope with a Leica HC PI APO 20x/0.7 fluorescence objective  
557 was used with a Dagan CA-1B amplifier and illuminated with a Lumen Dynamics X-Cite XLED1 light

558 source. Fluorescence was measured with a ThorLabs photomultiplier tube (PMT). The amplifier and  
559 light-emitting diode were controlled by a Digidata-1440A board and Axon™ pClamp™ 10.7 software  
560 package (Molecular Devices). For the FRET experiments, light was filtered through a HQ436/20  
561 excitation filter and directed to the objective with a 455LP dichroic (Chroma). The microscope cube did  
562 not contain an emission filter, because the ThorLabs PMT module contains its own cube. Thus, the  
563 emitted light was filtered before the PMTs with a 510-nm dichroic, an HQ480/40 emission filter for CFP,  
564 and an HQ535/30 emission filter for YFP (Chroma). For the gPLC experiments, light was filtered  
565 through a HQ470/40 excitation filter, an HQ525/50 emission filter and a Q496LP dichroic (Chroma).  
566 The voltage protocol consisted of steps from -100 to 180 mV in irregular increments. The length of the  
567 voltage pulse was 1.5-2 s for XI-VSP1 and varied for XI-VSP2, 2-10 s for fTAPP, and fPLC, and 3 s for  
568 gPLC. Rest periods of 1-3 min between voltage steps were used to allow the cell to recover depleted  
569 PIP concentrations before the next voltage step. The resulting FRET or fluorescence was then plotted  
570 versus the voltage to generate the fluorescence versus voltage relationship.

571

## 572 **Data analysis**

573 For the FRET experiments, Axon™ Clampfit™ 10.7 (Molecular Devices) was used to calculate  
574 the FRET ratio. For the FRET or fluorescence increases (fTAPP and gPLC), the  $\Delta F/F$ ,  
575  $(F_{after} - F_{before}) / F_{before}$ , was calculated from the pre-pulse baseline to the max signal increase. For the  
576 fPLC FRET decrease, the  $\Delta F/F$  was calculated from the pre-pulse baseline to the max FRET decrease.  
577 For the fTAPP FRET decrease, the  $\Delta F/F$  was calculated from the max FRET increase to the max FRET  
578 decrease. Calculations were done in Excel (Microsoft) or IGOR Pro (WaveMetrics) and data was  
579 plotted in IGOR Pro. When bleaching was observed, it was corrected by fitting to a line and dividing the  
580 values by the fit to obtain the final, bleaching-corrected signal. Final voltage dependent curves were  
581 plotted with change in FRET or fluorescence on the Y-axis and voltage on the X-axis. The data were fit  
582 to single Boltzmann equations. Activity assays were repeated on oocytes extracted on different days

583 from at least three different frogs (biological replicates) until data from a minimum of 8 oocytes were  
584 acquired and analyzed. Error bars indicate standard error of the mean (SEM). IHC images were  
585 processed with NIS-Elements (Nikon). Fluorescence signals from anti-VSP and matching secondary-  
586 alone control images were processed in parallel while applying the same post-image processing  
587 parameters in each case. Figures were made either in Illustrator or Photoshop 2018 (Adobe).

588

## 589 **Acknowledgements**

590 We thank Y. Okamura (Osaka University, Osaka, Japan) for kindly providing the Ci-VSP and Dr-  
591 VSP cDNAs, E.Y. Isacoff (University of California, Berkeley) for providing the fPLC and fTAPP and T.  
592 Meyer for providing the gPLC. We also thank D. Rashid and M. Chaverra for technical assistance and  
593 advice.

594

## 595 **Author contributions**

596 W. Ratzan and S.C. Kohout conceived and designed the experiments. W. Ratzan, S.E. Killian, V.  
597 Rayaprolu, R. Bradley and S.C. Kohout collected and analyzed data. W. Ratzan, V. Rayaprolu and S.C.  
598 Kohout wrote the manuscript. All authors approved the final version of the manuscript.

599

## 600 **References**

- 601 1. Di Paolo G, De Camilli P. Phosphoinositides in cell regulation and membrane dynamics. *Nature*  
602 2006;443(7112): 651–7.
- 603 2. Balla T. Phosphoinositides: Tiny Lipids With Giant Impact on Cell Regulation. *Physiol Rev*  
604 2013;93(3): 1019–137.
- 605 3. McCrea HJ, De Camilli P. Mutations in Phosphoinositide Metabolizing Enzymes and Human



- 606 Disease. *Physiology* 2009;24(1): 8–16.
- 607 4. Hakim S, Bertucci MC, Conduit SE, Vuong DL, Mitchell CA. Inositol polyphosphate  
608 phosphatases in human disease. *Curr Top Microbiol Immunol* 2012;362: 247–314.
- 609 5. Clayton EL, Minogue S, Waugh MG. Phosphatidylinositol 4-kinases and PI4P metabolism in the  
610 nervous system: Roles in psychiatric and neurological diseases. *Mol Neurobiol* 2013;47(1): 361–  
611 72.
- 612 6. Waugh MG. PIPs in neurological diseases. *Biochim Biophys Acta - Mol Cell Biol Lipids*  
613 2015;1851(8): 1066–82.
- 614 7. Shi T-JS, Liu S-XL, Hammarberg H, Watanabe M, Xu Z-QD, Hokfelt T. Phospholipase C 3 in  
615 mouse and human dorsal root ganglia and spinal cord is a possible target for treatment of  
616 neuropathic pain. *Proc Natl Acad Sci* 2008;105(50): 20004–8.
- 617 8. Wright BD, Loo L, Street SE, Ma A, Taylor-Blake B, Stashko MA, et al. The Lipid Kinase  
618 PIP5K1C Regulates Pain Signaling and Sensitization. *Neuron* 2014;82(4): 836–47.
- 619 9. Ludtmann MHR, Boeckeler K, Williams RSB. Molecular pharmacology in a simple model system:  
620 Implicating MAP kinase and phosphoinositide signalling in bipolar disorder. *Semin Cell Dev Biol*  
621 2011;22(1): 105–13.
- 622 10. Murata Y, Iwasaki H, Sasaki M, Inaba K, Okamura Y. Phosphoinositide phosphatase activity  
623 coupled to an intrinsic voltage sensor. *Nature* 2005;435(7046): 1239–43.
- 624 11. Iwasaki H, Murata Y, Kim Y, Hossain MI, Worby CA, Dixon JE, et al. A voltage-sensing  
625 phosphatase, Ci-VSP, which shares sequence identity with PTEN, dephosphorylates  
626 phosphatidylinositol 4,5-bisphosphate. *Proc Natl Acad Sci* 2008;105(23): 7970–5.
- 627 12. Halaszovich CR, Schreiber DN, Oliver D. Ci-VSP is a depolarization-activated

- 628 phosphatidylinositol-4,5-bisphosphate and phosphatidylinositol-3,4,5-trisphosphate 5'-  
629 phosphatase. *J Biol Chem* 2009;284(4): 2106–13.
- 630 13. Kurokawa T, Takasuga S, Sakata S, Yamaguchi S, Horie S, Homma KJ, et al. 3' Phosphatase  
631 activity toward phosphatidylinositol 3,4-bisphosphate [PI(3,4)P<sub>2</sub>] by voltage-sensing  
632 phosphatase (VSP). *Proc Natl Acad Sci* 2012;109(25): 10089–94.
- 633 14. Castle PM, Zolman KD, Kohout SC. Voltage-sensing phosphatase modulation by a C2 domain.  
634 *Front Pharmacol* 2015;6(Mar): 1–15.
- 635 15. Henquin JC. Triggering and amplifying pathways of regulation of insulin secretion by glucose.  
636 *Diabetes* 2000;49(11): 1751–60.
- 637 16. Hebert SC. Molecular Diversity and Regulation of Renal Potassium Channels. *Physiol Rev*  
638 2005;85(1): 319–71.
- 639 17. Rohacs T. Phosphoinositide regulation of TRP channels. In Nilius B, Flockerzi V (eds)  
640 Mammalian Transient Receptor Potential (TRP) Cation Channels: Handbook of Experimental  
641 Pharmacology 2014; p. 1143–76.
- 642 18. Hille B, Dickson EJ, Kruse M, Vivas O, Suh BC. Phosphoinositides regulate ion channels.  
643 *Biochim Biophys Acta - Mol Cell Biol Lipids* 2015;1851(6): 844–56.
- 644 19. Hansen SB. Lipid agonism: The PIP<sub>2</sub> paradigm of ligand-gated ion channels. *Biochim Biophys*  
645 *Acta - Mol Cell Biol Lipids* 2015;1851(5): 620–8.
- 646 20. Walker SM, Downes CP, Leslie NR. TPIP: a novel phosphoinositide 3-phosphatase. *Biochem J*  
647 2001;360(Pt 2): 277–83.
- 648 21. Neuhaus H, Hollemann T. Kidney specific expression of cTPTE during development of the chick  
649 embryo. *Gene Expr Patterns* 2009;9(8): 568–71.

- 650 22. Ratzan WJ, Evsikov A V., Okamura Y, Jaffe LA. Voltage sensitive phosphoinositide  
651 phosphatases of *Xenopus*: Their tissue distribution and voltage dependence. *J Cell Physiol*  
652 2011;226(11): 2740–6.
- 653 23. Mutua J, Jinno Y, Sakata S, Okochi Y, Ueno S, Tsutsui H, et al. Functional diversity of voltage-  
654 sensing phosphatases in two urodele amphibians. *Physiol Rep* 2014;2(7): e12061-13.
- 655 24. Chen H, Rossier C, Morris MA, Scott HS, Gos A, Bairoch A, et al. A testis-specific gene, TPTE,  
656 encodes a putative transmembrane tyrosine phosphatase and maps to the pericentromeric  
657 region of human chromosomes 21 and 13, and to chromosomes 15, 22, and Y. *Hum Genet*  
658 1999;105(5): 399–409.
- 659 25. Wu Y, Dowbenko D, Pisabarro MT, Dillard-Telm L, Koeppen H, Lasky LA. PTEN 2, a Golgi-  
660 associated Testis-specific Homologue of the PTEN Tumor Suppressor Lipid Phosphatase. *J Biol*  
661 *Chem* 2001;276(24): 21745–53.
- 662 26. Hossain I, Iwasaki H, Okochi Y, Chahine M, Higashijima S, Nagayama K, et al. Enzyme domain  
663 affects the movement of the voltage sensor in ascidian and zebrafish voltage-sensing  
664 phosphatases. *J Biol Chem* 2008;283(26): 18248–59.
- 665 27. Reymond A, Marigo V, Yaylaoglu MB, Leoni A, Ucla C, Scamuffa N, et al. Human chromosome  
666 21 gene expression atlas in the mouse. *Nature* 2002;420(6915): 582–6.
- 667 28. Ogasawara M, Sasaki M, Nakazawa N, Nishino A, Okamura Y. Gene expression profile of Ci-  
668 VSP in juveniles and adult blood cells of ascidian. *Gene Expr Patterns* 2011;11(3–4): 233–8.
- 669 29. Guipponi M, Tapparel C, Jousson O, Scamuffa N, Mas C, Rossier C, et al. The murine  
670 orthologue of the Golgi-localized TPTE protein provides clues to the evolutionary history of the  
671 human TPTE gene family. *Hum Genet* 2001;109(6): 569–75.
- 672 30. Yamaguchi S, Aoki N, Kitajima T, Okamura Y, Homma KJ. Expression of the voltage-sensing

- 673 phosphatase gene in the chick embryonic tissues and in the adult cerebellum. *Commun Integr*  
674 *Biol* 2014;7(5): e9705021-5.
- 675 31. Thisse Thisse, Christine B. Fast Release Clones: A High Throughput Expression Analysis. .  
676 Available from: <https://zfin.org/ZDB-PUB-040907-1ZFIN> Direct Data Submission. 2004.
- 677 32. Rosasco MG, Gordon SE, Bajjalieh SM. Characterization of the Functional Domains of a  
678 Mammalian Voltage-Sensitive Phosphatase. *Biophys J* 2015;109(12): 2430–91.
- 679 33. Session AM, Uno Y, Kwon T, Chapman JA, Toyoda A, Takahashi S, et al. Genome evolution in  
680 the allotetraploid frog *Xenopus laevis*. *Nature* 2016;538(7625): 336–43.
- 681 34. Nieuwkoop PD, Faber J. Normal table of *Xenopus laevis* (Daudin) : a systematical and  
682 chronological survey of the development from the fertilized egg till the end of metamorphosis.  
683 1994; 252 p.
- 684 35. Ochi H, Tamai T, Nagano H, Kawaguchi A, Sudou N, Ogino H. Evolution of a tissue-specific  
685 silencer underlies divergence in the expression of *pax2* and *pax8* paralogues. *Nat Commun*  
686 2012;3: 847–8.
- 687 36. Corkins ME, Hanania HL, Krneta-Stankic V, Delay BD, Pearl EJ, Lee M, et al. Transgenic  
688 *Xenopus laevis* line for in vivo labeling of nephrons within the kidney. *Genes (Basel)* 2018;9(4):  
689 114–97.
- 690 37. Keum D, Kruse M, Kim D-I, Hille B, Suh B-C. Phosphoinositide 5- and 3-phosphatase activities  
691 of a voltage-sensing phosphatase in living cells show identical voltage dependence. *Proc Natl*  
692 *Acad Sci* 2016;113(26): E3686–95.
- 693 38. Lemmon MA, Ferguson KM, O'Brien R, Sigler PB, Schlessinger J. Specific and high-affinity  
694 binding of inositol phosphates to an isolated pleckstrin homology domain. *Proc Natl Acad Sci*  
695 *USA* 1995;92(23): 10472–6.

- 696 39. Stauffer TP, Ahn S, Meyer T. Receptor-induced transient reduction in plasma membrane  
697 PtdIns(4,5)P<sub>2</sub> concentration monitored in living cells. *Curr Biol* 1998;8(6): 343–6.
- 698 40. Kimber WA, Trinkle-Mulcahy L, Cheung PCF, Deak M, Marsden LJ, Kieloch A, et al. Evidence  
699 that the tandem-pleckstrin-homology-domain-containing protein TAPP1 interacts with Ptd(3,4)P<sub>2</sub>  
700 and the multi-PDZ-domain-containing protein MUPP1 in vivo. *Biochem J* 2002;361(3): 525–36.
- 701 41. Grimm SS, Isacoff EY. Allosteric substrate switching in a voltage-sensing lipid phosphatase. *Nat*  
702 *Chem Biol* 2016;12(4): 261–7.
- 703 42. Rayaprolu V, Royal P, Stengel K, Sandoz G, Kohout SC. Dimerization of the voltage-sensing  
704 phosphatase controls its voltage-sensing and catalytic activity. *J Gen Physiol* 2018;150(5):  
705 [jgp.201812064](https://doi.org/10.1085/jgp.201812064).
- 706 43. Sato M, Ueda Y, Takagi T, Umezawa Y. Production of PtdInsP<sub>3</sub> at endomembranes is triggered  
707 by receptor endocytosis. *Nat Cell Biol* 2003;5(11): 1016–22.
- 708 44. Kohout SC, Bell SC, Liu L, Xu Q, Minor DL, Isacoff EY. Electrochemical coupling in the voltage-  
709 dependent phosphatase Ci-VSP. *Nat Chem Biol* 2010;6(5): 369–75.
- 710 45. Tsujita K, Itoh T. Phosphoinositides in the regulation of actin cortex and cell migration. *Biochim*  
711 *Biophys Acta - Mol Cell Biol Lipids* 2015;1851(6): 824–31.
- 712 46. Warth R. Potassium channels in epithelial transport. *Pflugers Arch Eur J Physiol* 2003;446(5):  
713 505–13.
- 714 47. Nishimura H, Fan Z. Regulation of water movement across vertebrate renal tubules. *Comp*  
715 *Biochem Physiol - A Mol Integr Physiol* 2003;136(3): 479–98.
- 716 48. Barratt LJ, Rector FC, Kokko JP, Seldin DW. Factors governing the transepithelial potential  
717 difference across the proximal tubule of the rat kidney. *J Clin Invest* 1974;53(2): 454–64.

- 718 49. Horisberger JD. Na-K pump current in the Amphiuma collecting tubule. *J Gen Physiol*  
719 1989;94(3): 493–510.
- 720 50. Wang T, Weinbaum S, Weinstein AM. Regulation of glomerulotubular balance: flow-activated  
721 proximal tubule function. *Pflugers Arch Eur J Physiol* 2017;469(5–6): 643–54.
- 722 51. Rawlins FA, González E, Pérez-González M, Whittombury G. Effect of transtubular osmotic  
723 gradients on the paracellular pathway in toad kidney proximal tubule - Electron microscopic  
724 observations. *Pflügers Arch Eur J Physiol* 1975;353(4): 287–302.
- 725 52. Guo P, Weinstein AM, Weinbaum S. A hydrodynamic mechanosensory hypothesis for brush  
726 border microvilli. *Am J Physiol Physiol* 2000;10031(4): F698–712.
- 727 53. Praetorius HA, Frokiaer J, Nielsen S, Spring KR. Bending the primary cilium opens Ca<sup>2+</sup>-  
728 sensitive intermediate-conductance K<sup>+</sup> channels in MDCK cells. *J Membr Biol* 2003;191(3): 193–  
729 200.
- 730 54. Praetorius HA, Spring KR. Bending the MDCK cell primary cilium increases intracellular calcium.  
731 *J Membr Biol* 2001;184(1): 71–9.
- 732 55. Sauvanet C, Wayt J, Pelaseyed T, Bretscher A. Structure, Regulation, and Functional Diversity  
733 of Microvilli on the Apical Domain of Epithelial Cells. *Annu Rev Cell Dev Biol* 2015;31(1): 593–  
734 621.
- 735 56. Yamaguchi S, Kurokawa T, Taira I, Aoki N, Sakata S, Okamura Y, et al. Potential role of voltage-  
736 sensing phosphatases in regulation of cell structure through the production of PI(3,4)P<sub>2</sub>. *J Cell*  
737 *Physiol* 2014;229(4): 422–33.
- 738 57. Mahon MJ. Apical membrane segregation of phosphatidylinositol-4,5-bisphosphate influences  
739 parathyroid hormone 1 receptor compartmental signaling and localization via direct regulation of  
740 ezrin in LLC-PK1 cells. *Cell Signal* 2011;23(10): 1659–68.

- 741 58. Garcia-Gonzalo FR, Phua SC, Roberson EC, Garcia G, Abedin M, Schurmans S, et al.  
742 Phosphoinositides Regulate Ciliary Protein Trafficking to Modulate Hedgehog Signaling. *Dev*  
743 *Cell* 2015;34(4): 400–9.
- 744 59. Vize PD, Jones EA, Pfister R. Development of the *Xenopus* pronephric system. Vol. 171,  
745 *Developmental Biology*. 1995. p. 531–40.
- 746 60. Pearl EJ, Grainger RM, Guille M, Horb ME. Development of xenopus resource centers: The  
747 National *Xenopus* Resource and the European *Xenopus* Resource Center. *Genesis* 2012;50(3):  
748 155–63.
- 749 61. Harland RM. Appendix G: In Situ Hybridization: An Improved Whole-Mount Method for *Xenopus*  
750 Embryos. . In *Xenopus laevis: Practical Uses in Cell and Molecular Biology* 1991; p. 685–95.
- 751 62. De Sousa PA, Masui Y. The effect of cytochalasin D on protein synthesis in *Xenopus laevis*  
752 oocytes. *Mol Reprod Dev* 1990;26(3): 248–52.

753

## 754 **Supporting Information**

755 **S1 Table. Voltage dependence of activity.**

756

757 **S1 Fig. Embryo total RNAs used for sqRT-PCR of XI-VSPs (NF stages 12-40).** RNA

758 concentrations were determined by Nanodrop spectrophotometry and 1 µg of RNA was run on  
759 a 2% agarose gel stained with ethidium bromide. The prominent bands seen here are the 28S  
760 and 18S ribosomal RNAs, indicating that the RNAs are not degraded and that approximately  
761 equal total RNA was used for subsequent sqRT-PCR analysis.

762

763 **S2 Fig. Whole-mount immunohistochemistry (IHC) of NF stage 42 Pax8:GFP embryos.**  
764 Embryos stained with 3G8 antibody (A-C), anti-VSP (A'-C') or secondary antibody alone  
765 control (A''-C''). The Pax8:GFP embryos show strong GFP expression in the proximal  
766 pronephros (B-B'') as confirmed by staining with the proximal pronephros marker 3G8 antibody  
767 (C). XI-VSP staining of tubules is clearly visible (C') and co-localizes with the GFP, indicating  
768 XI-VSP in the proximal pronephros. Positive staining is marked with arrowheads, whereas no  
769 signal above autofluorescence was seen in control animals stained with secondary antibody  
770 alone (C'').  
771



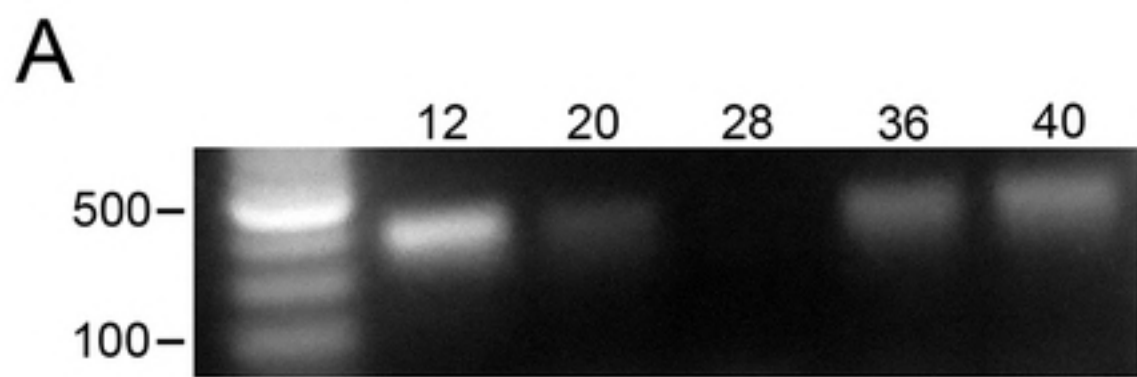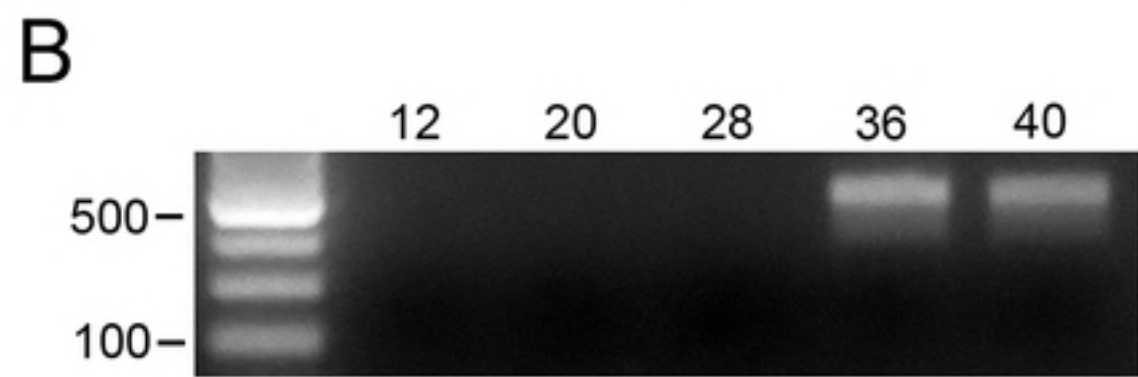

Fig 1

**A**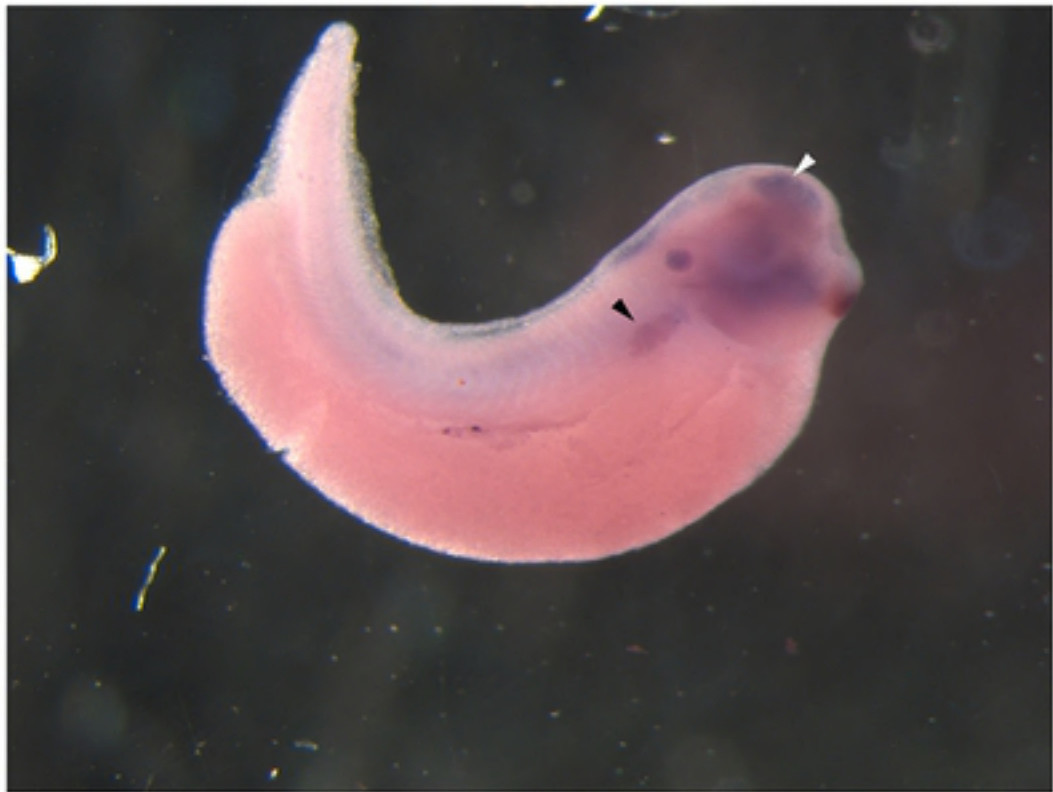**B**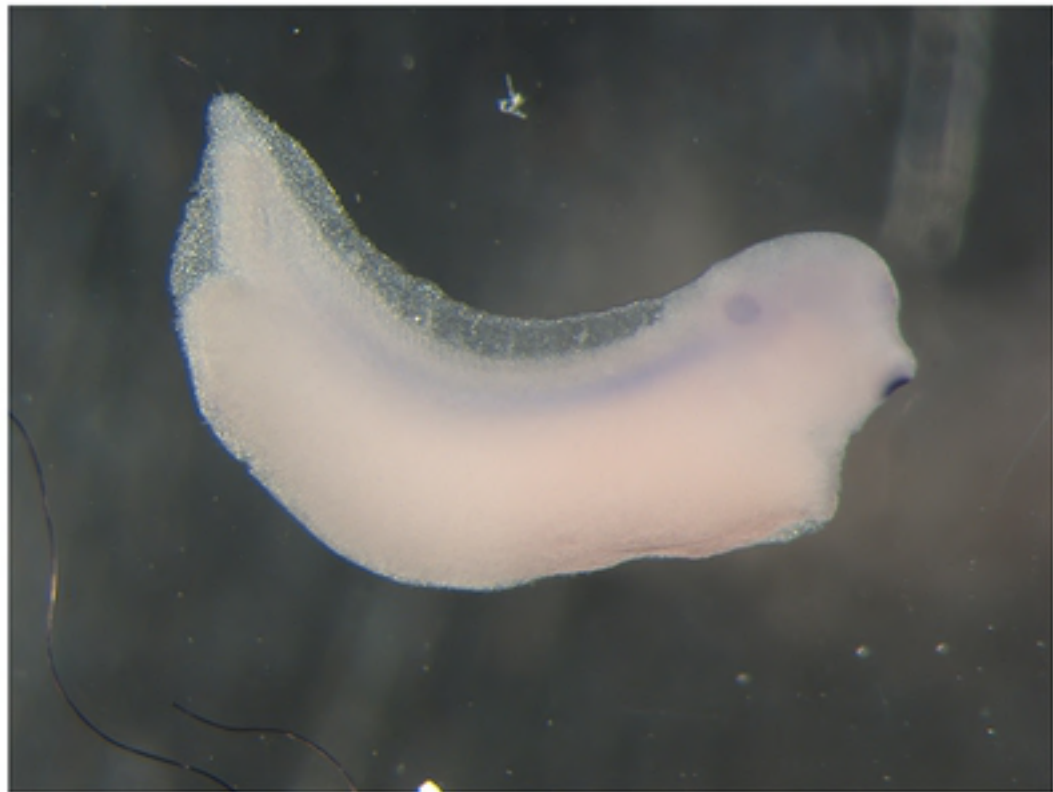**Fig 2**

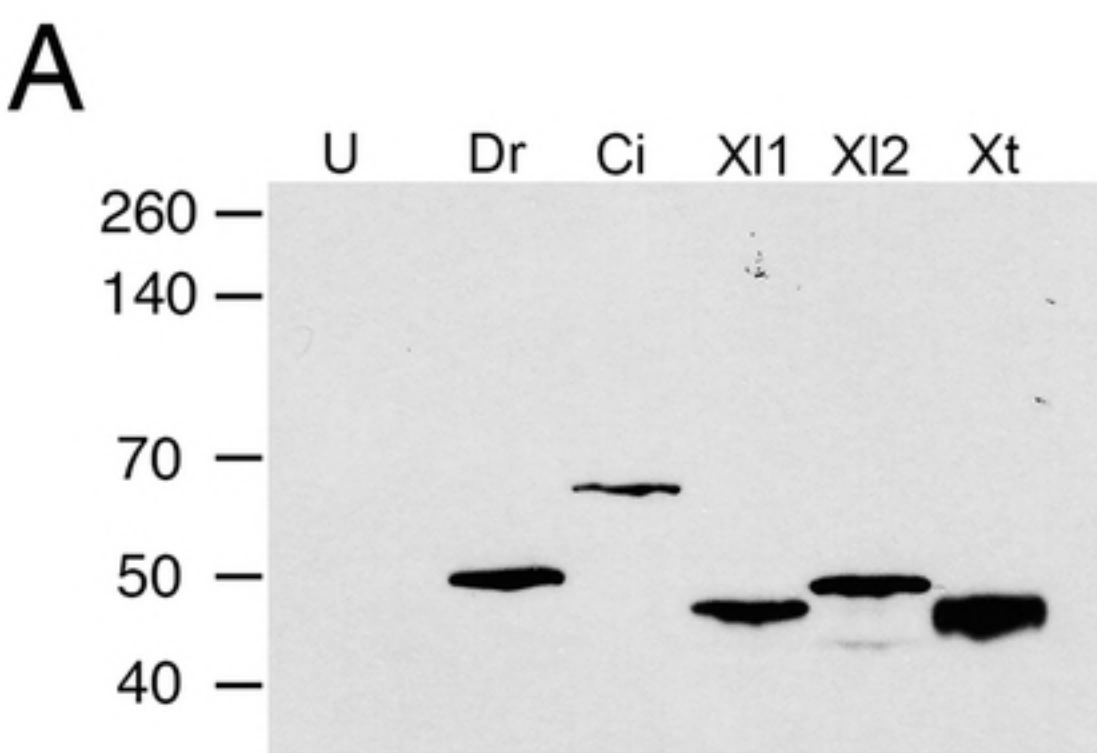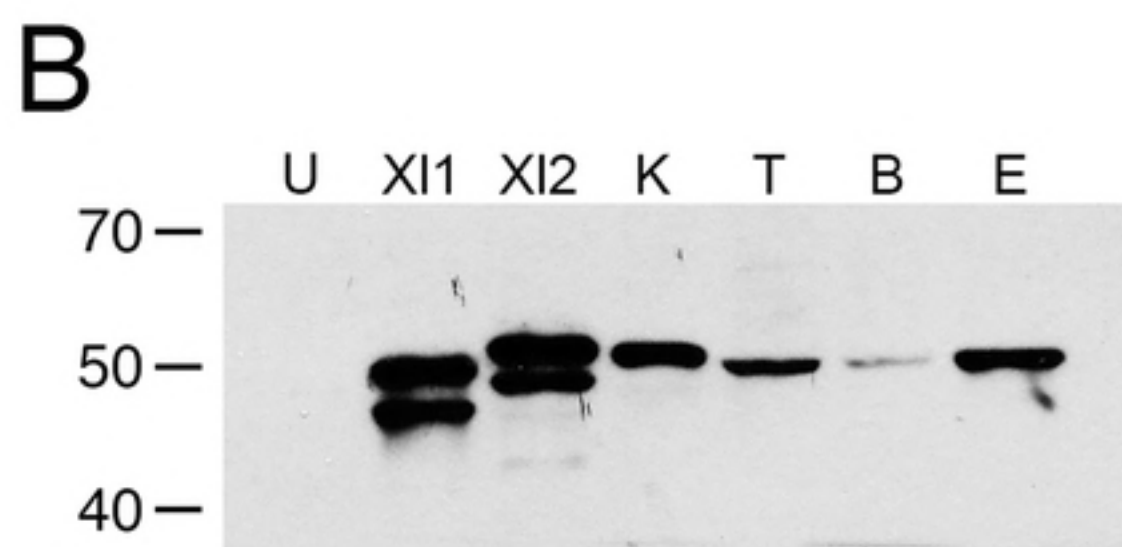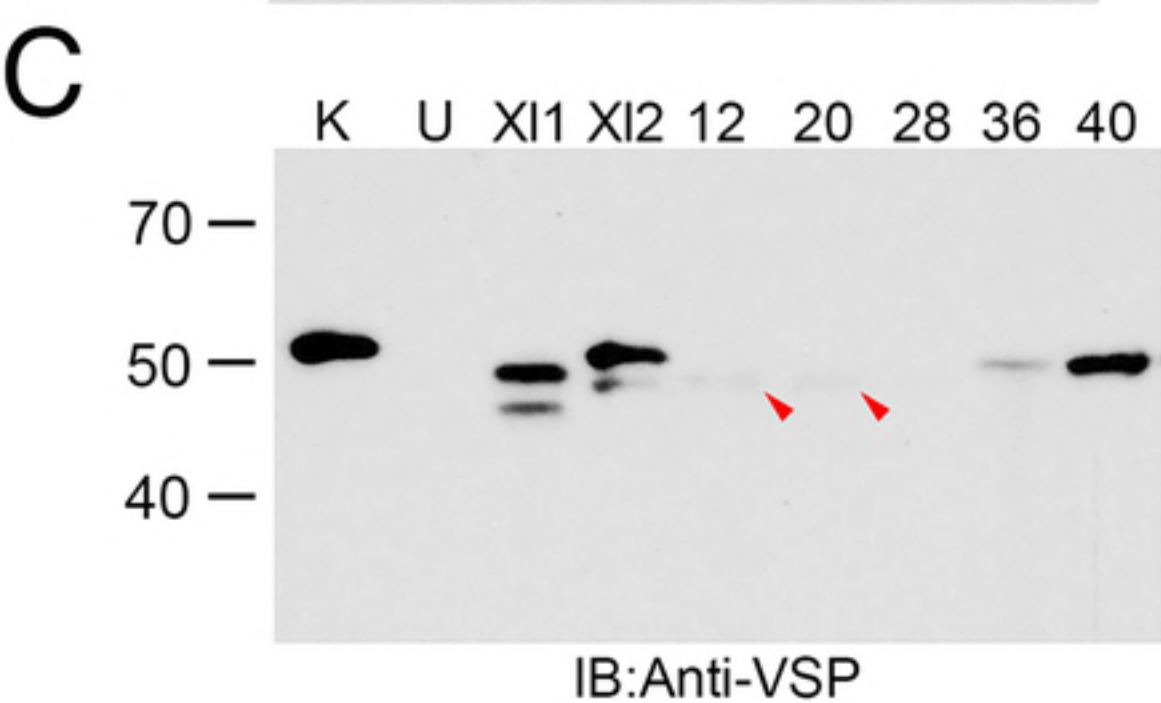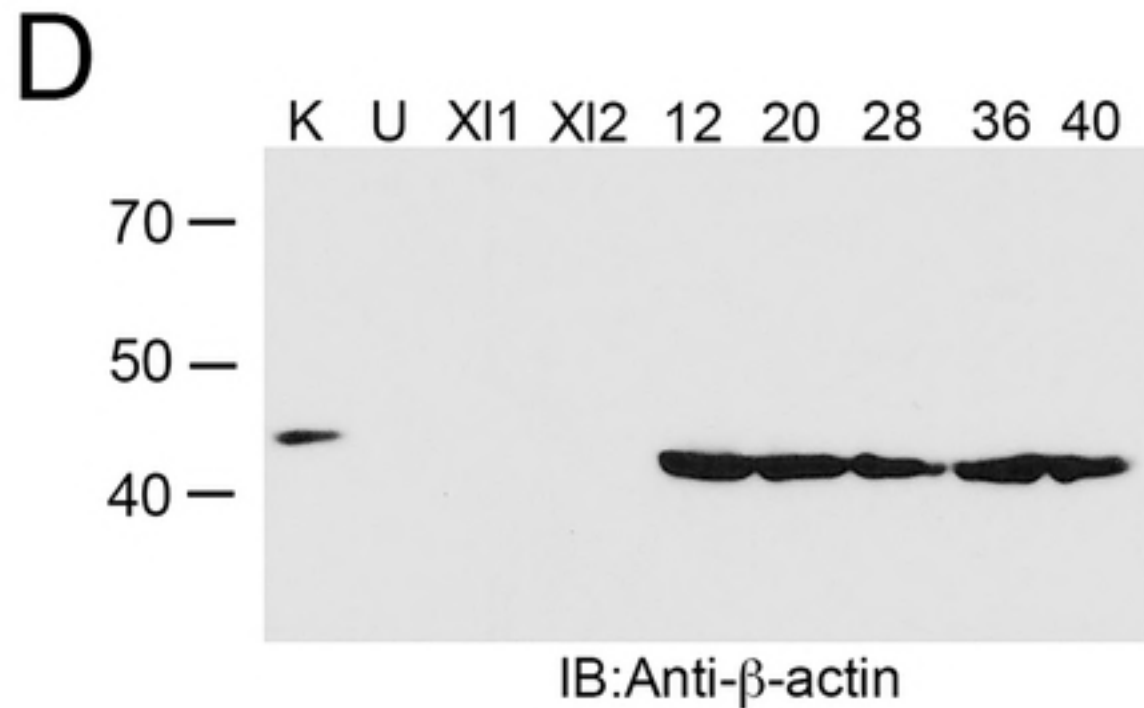

Fig 3

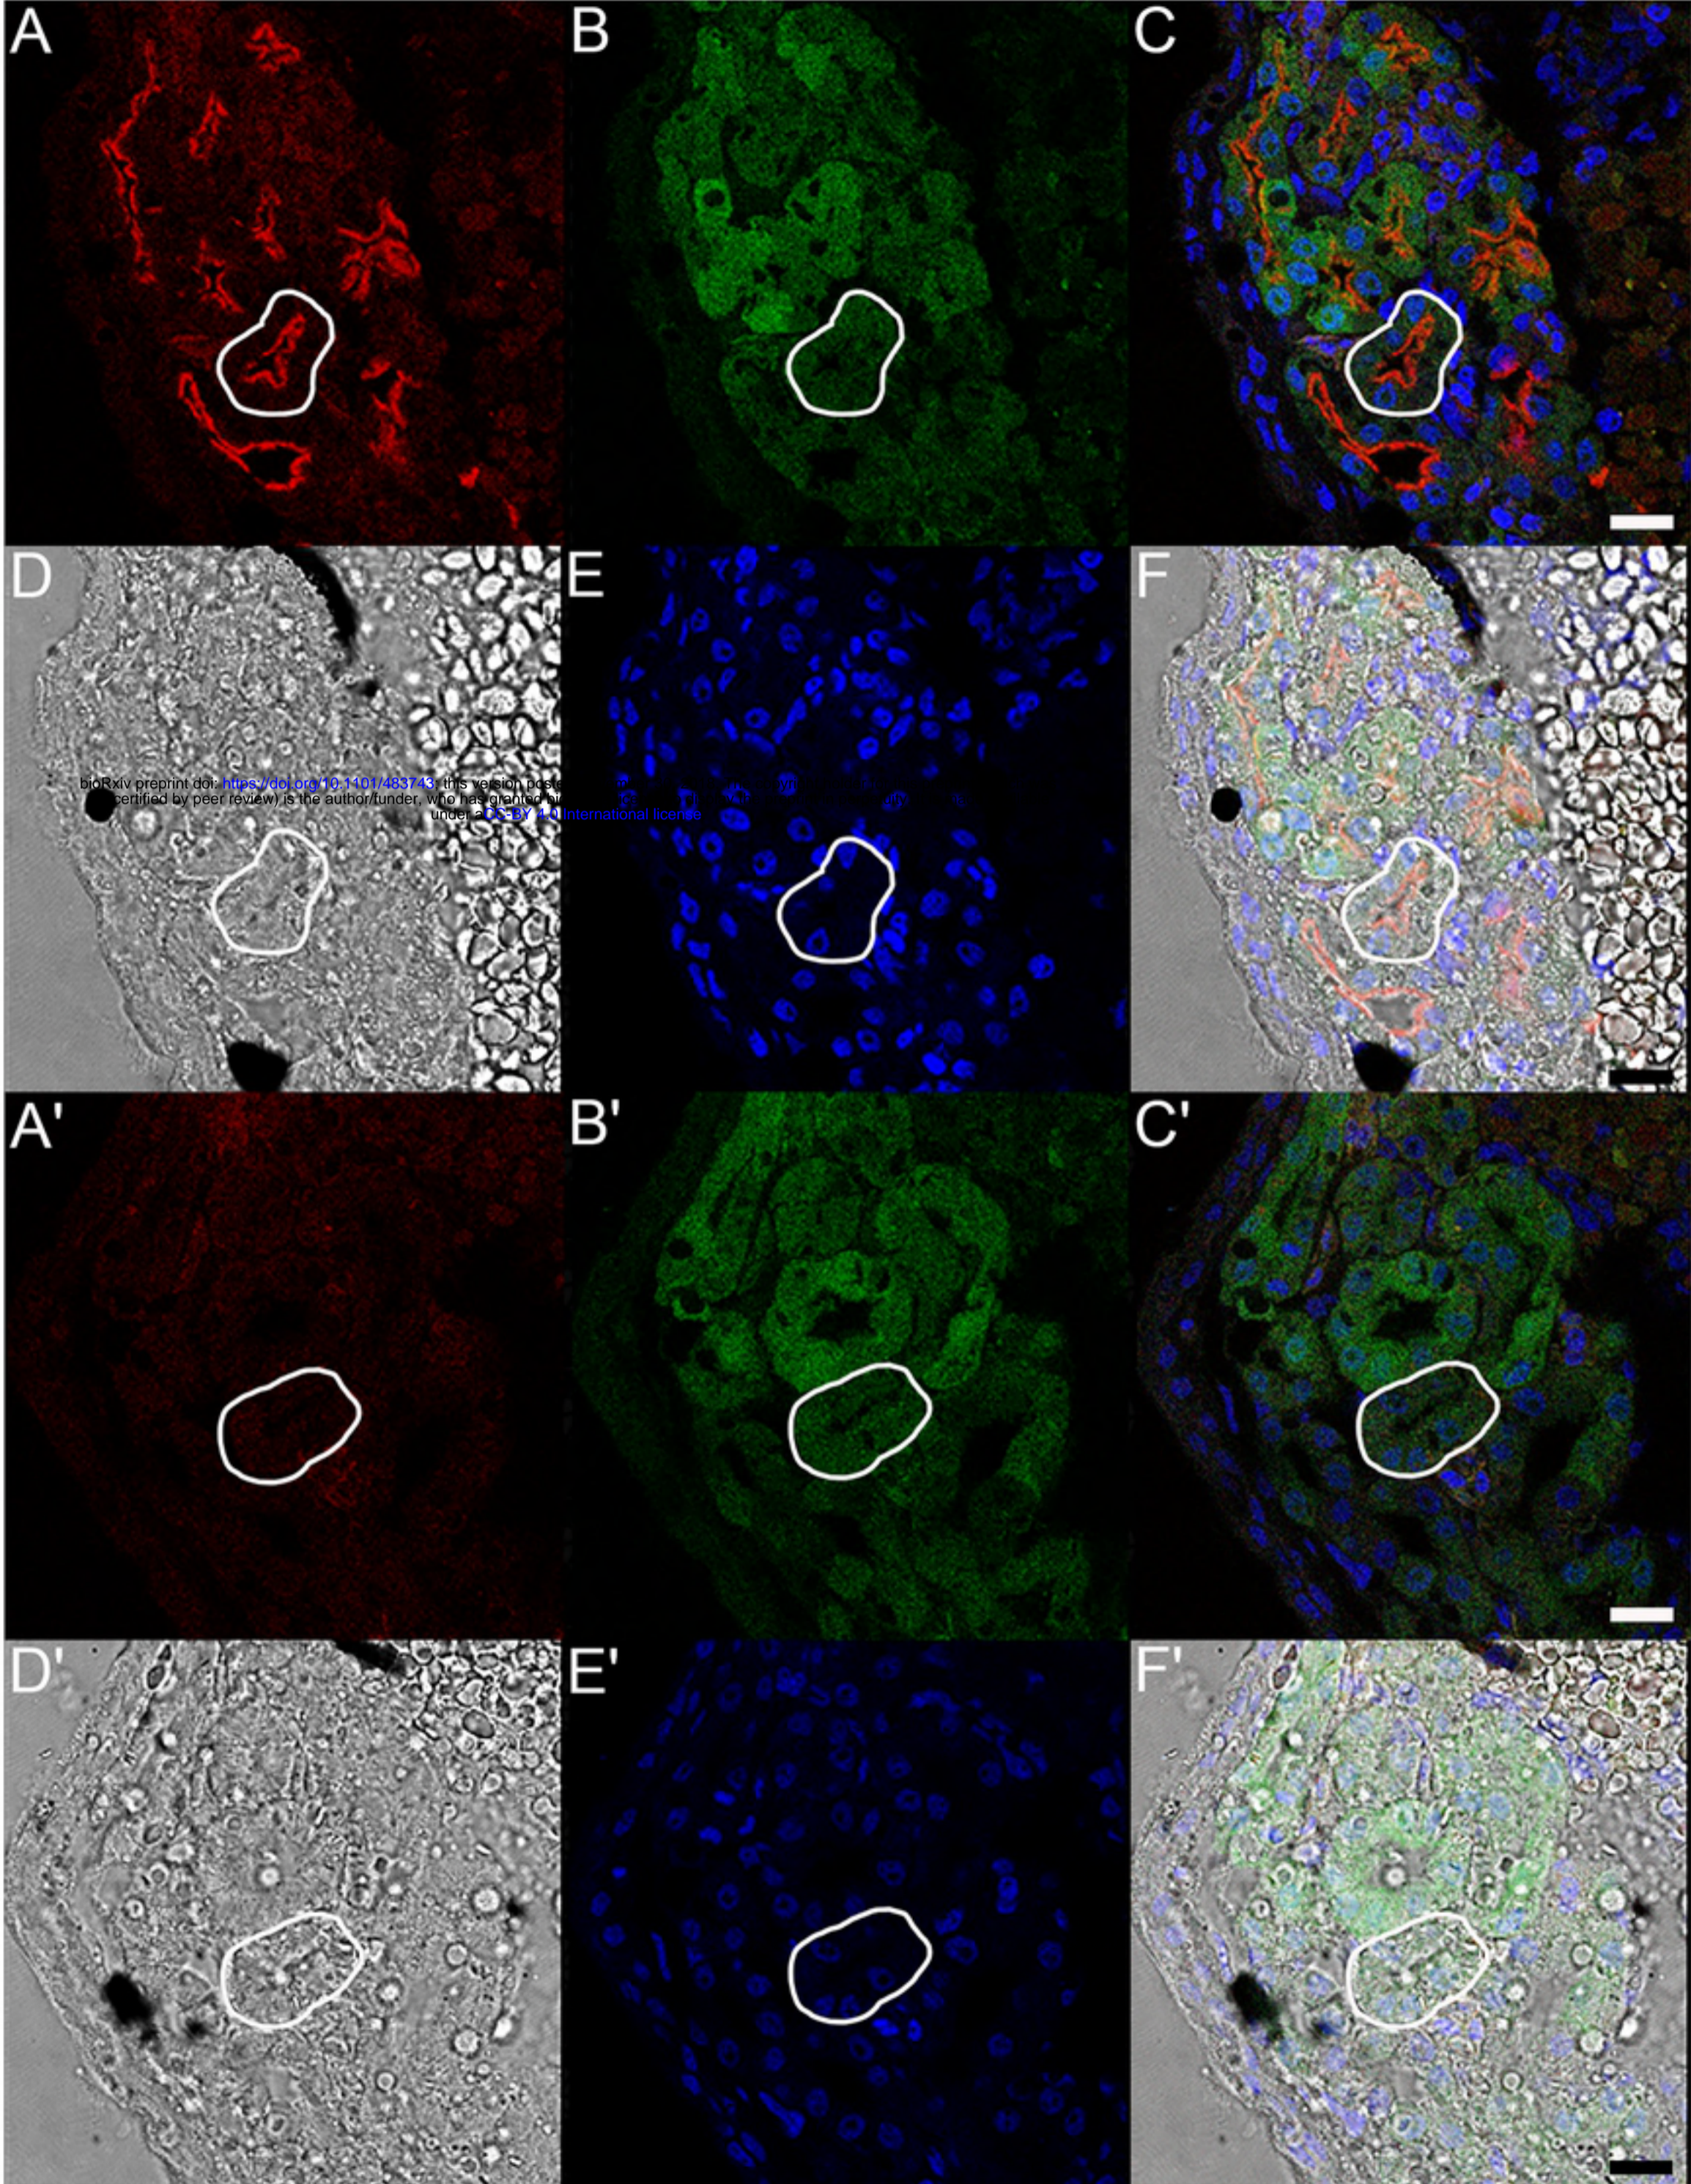

Fig 4

A

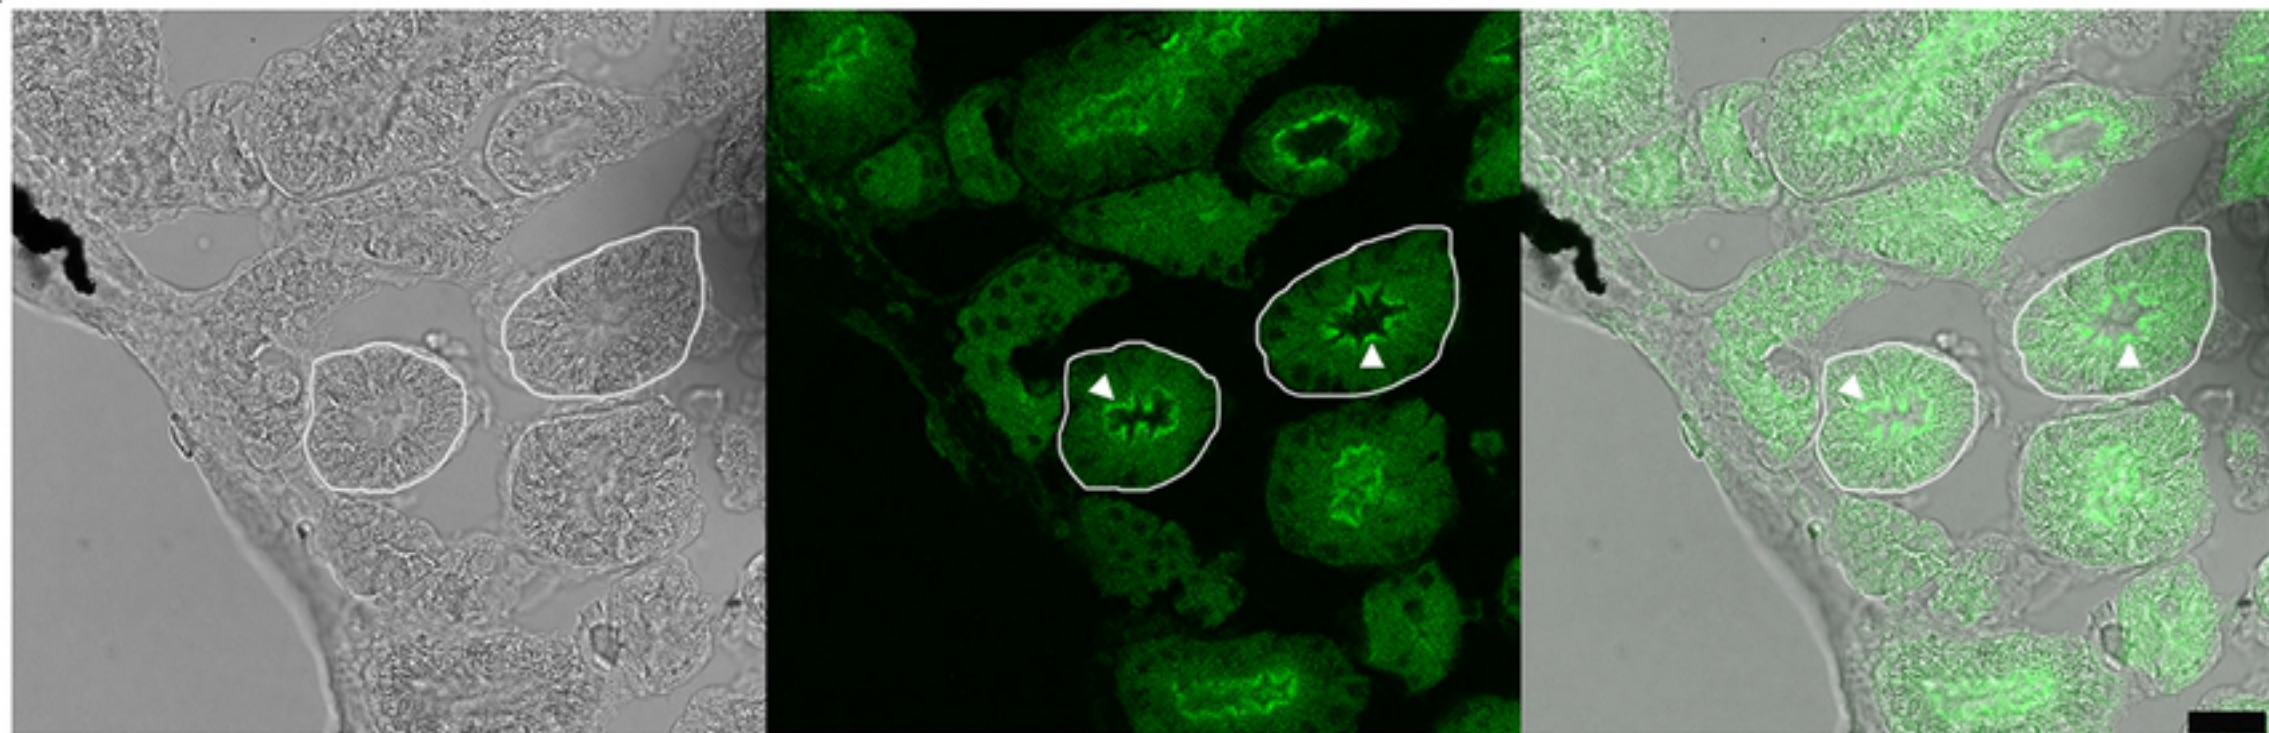

B

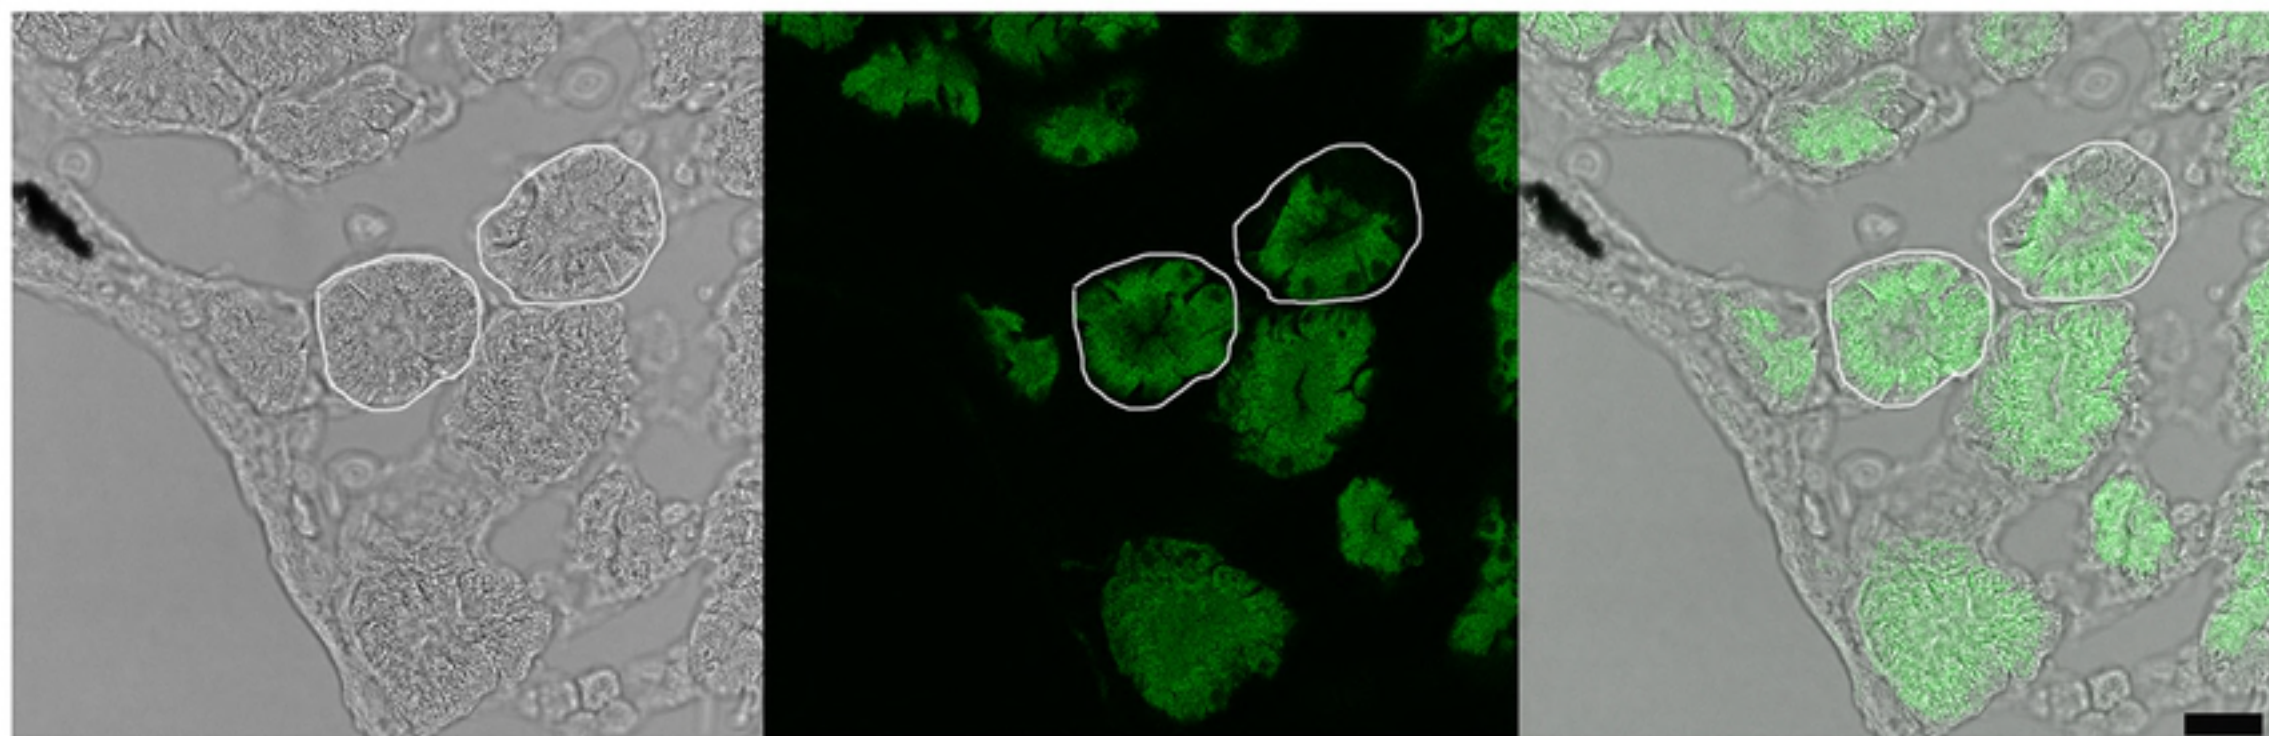

Fig 5

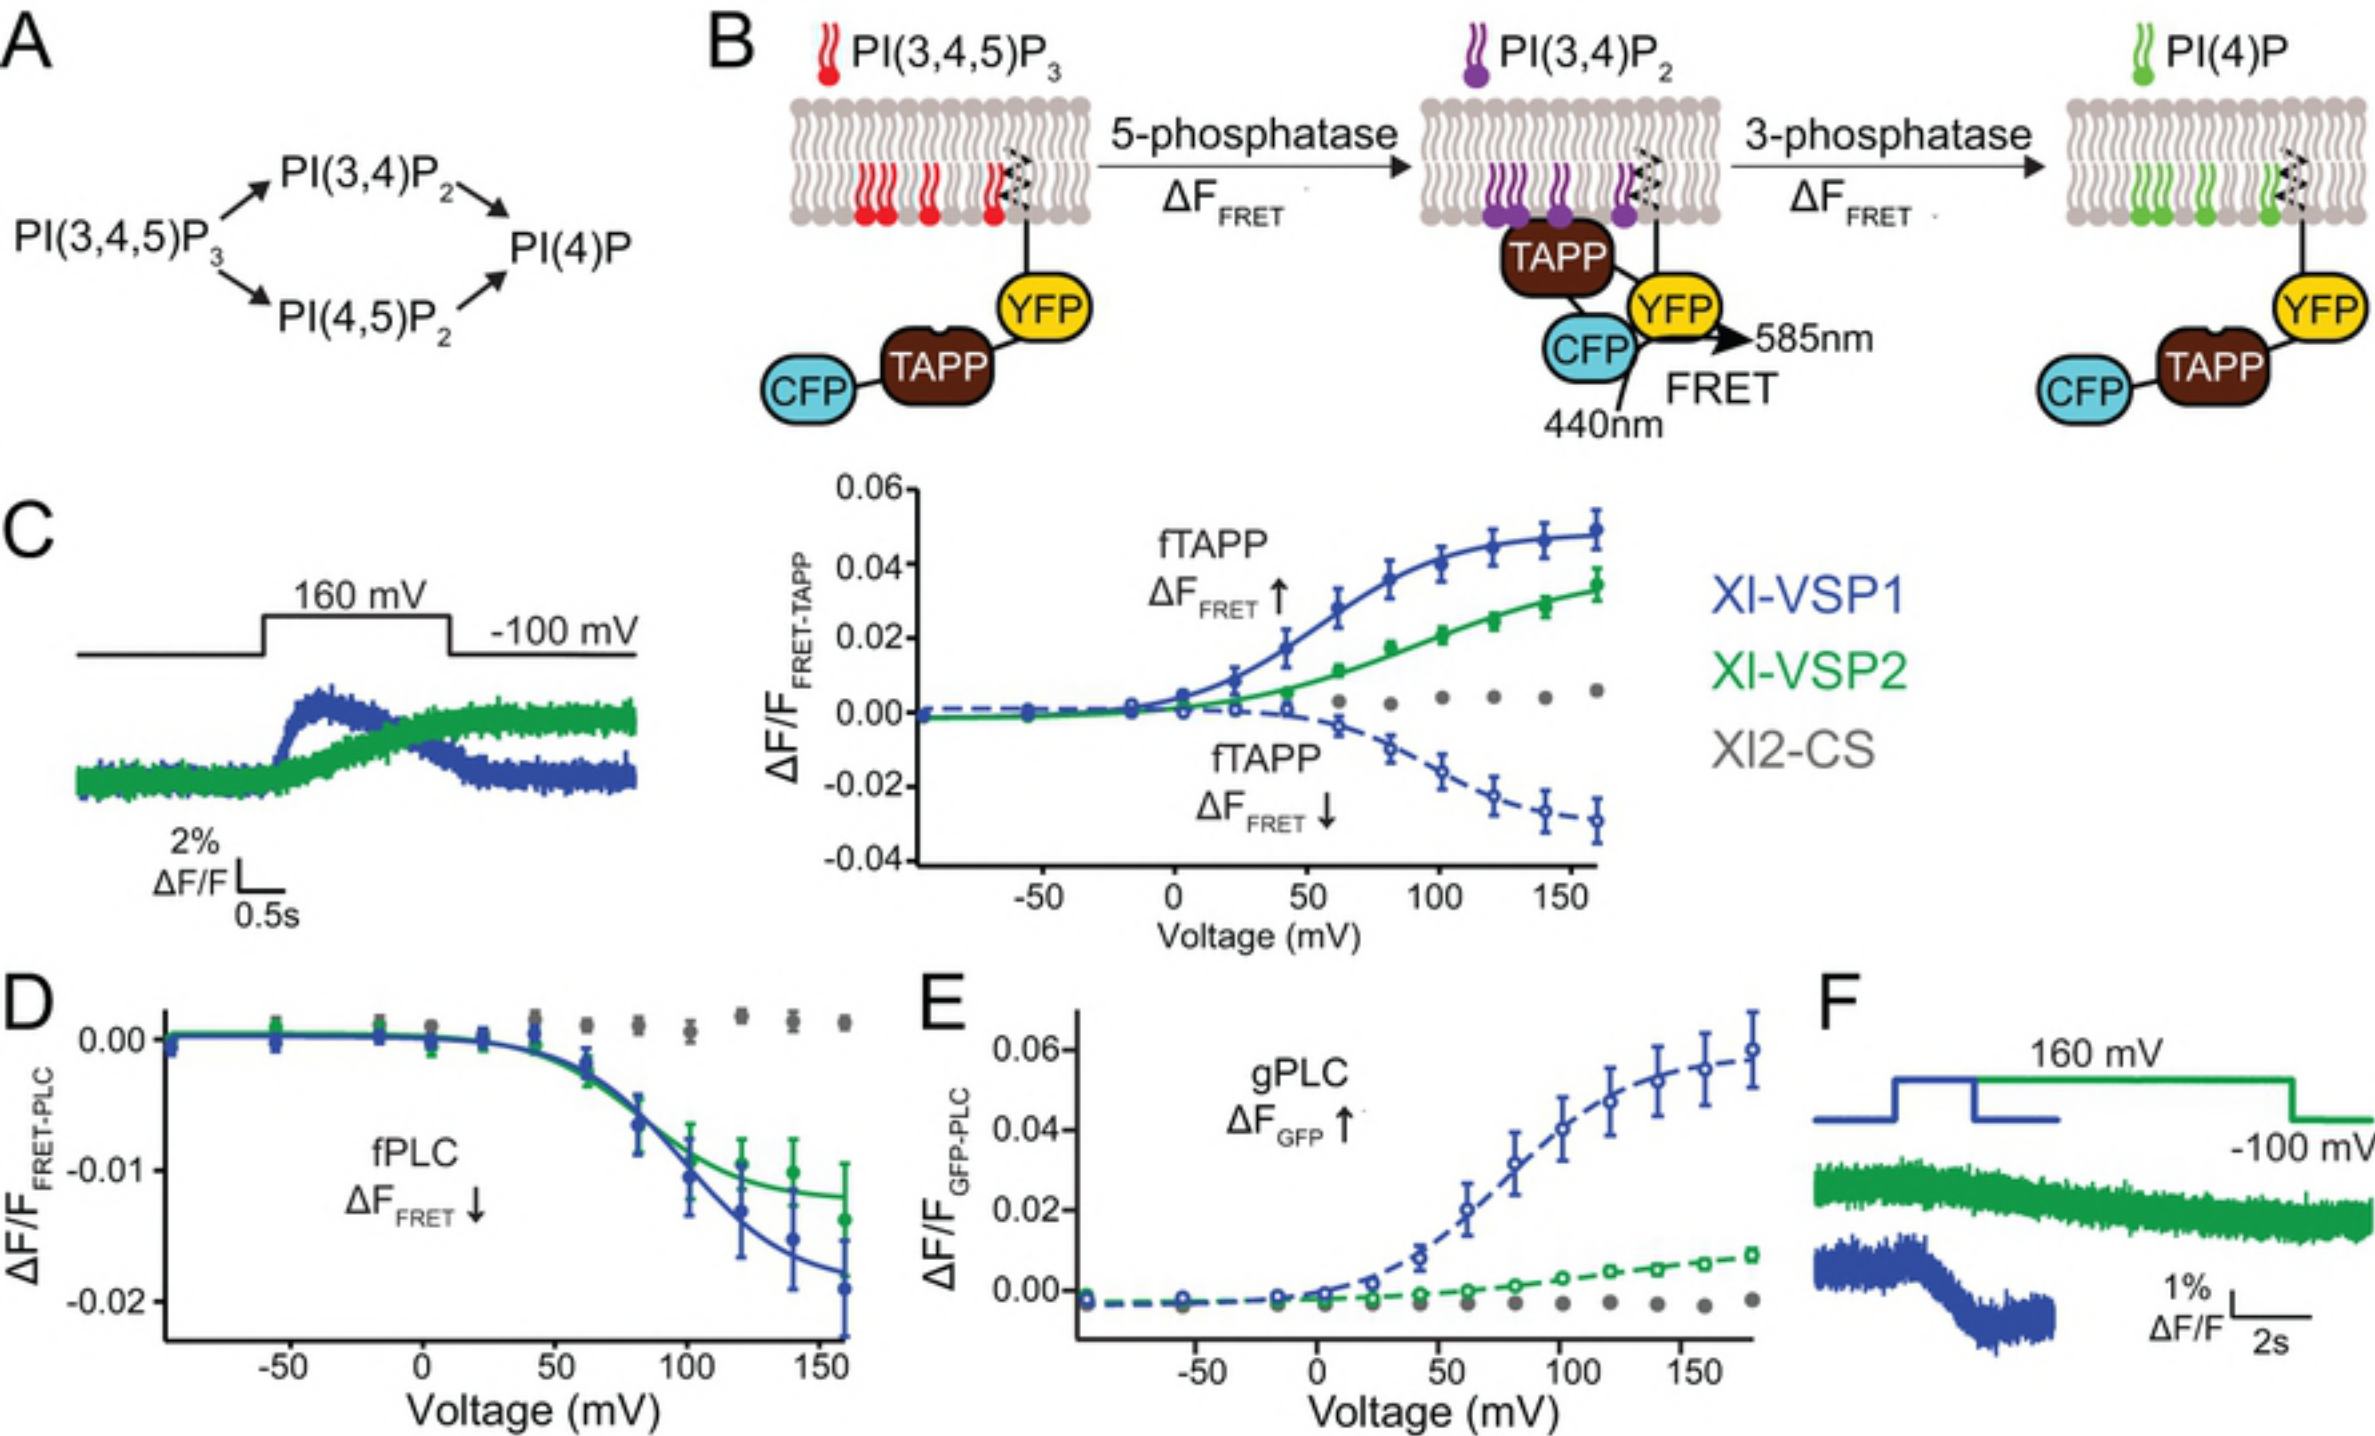

Fig 6

| VSP     | fTAPP |                     |                       | fPLC |                     | gPLC |                       |
|---------|-------|---------------------|-----------------------|------|---------------------|------|-----------------------|
|         | n     | V <sub>1/2</sub> up | V <sub>1/2</sub> down | n    | V <sub>1/2</sub> up | n    | V <sub>1/2</sub> down |
| XI-VSP1 | 10    | 55 ± 2              | 97 ± 3                | 11   | 98 ± 5              | 11   | 77 ± 3                |
| XI-VSP2 | 11    | 92 ± 8              | n/a                   | 11   | 83 ± 6              | 9    | 118 ± 3               |

bioRxiv preprint doi: <https://doi.org/10.1101/483743>; this version posted November 30, 2018. The copyright holder for this preprint (which was not certified by peer review) is the author/funder, who has granted bioRxiv a license to display the preprint in perpetuity. It is made available under aCC-BY 4.0 International license.

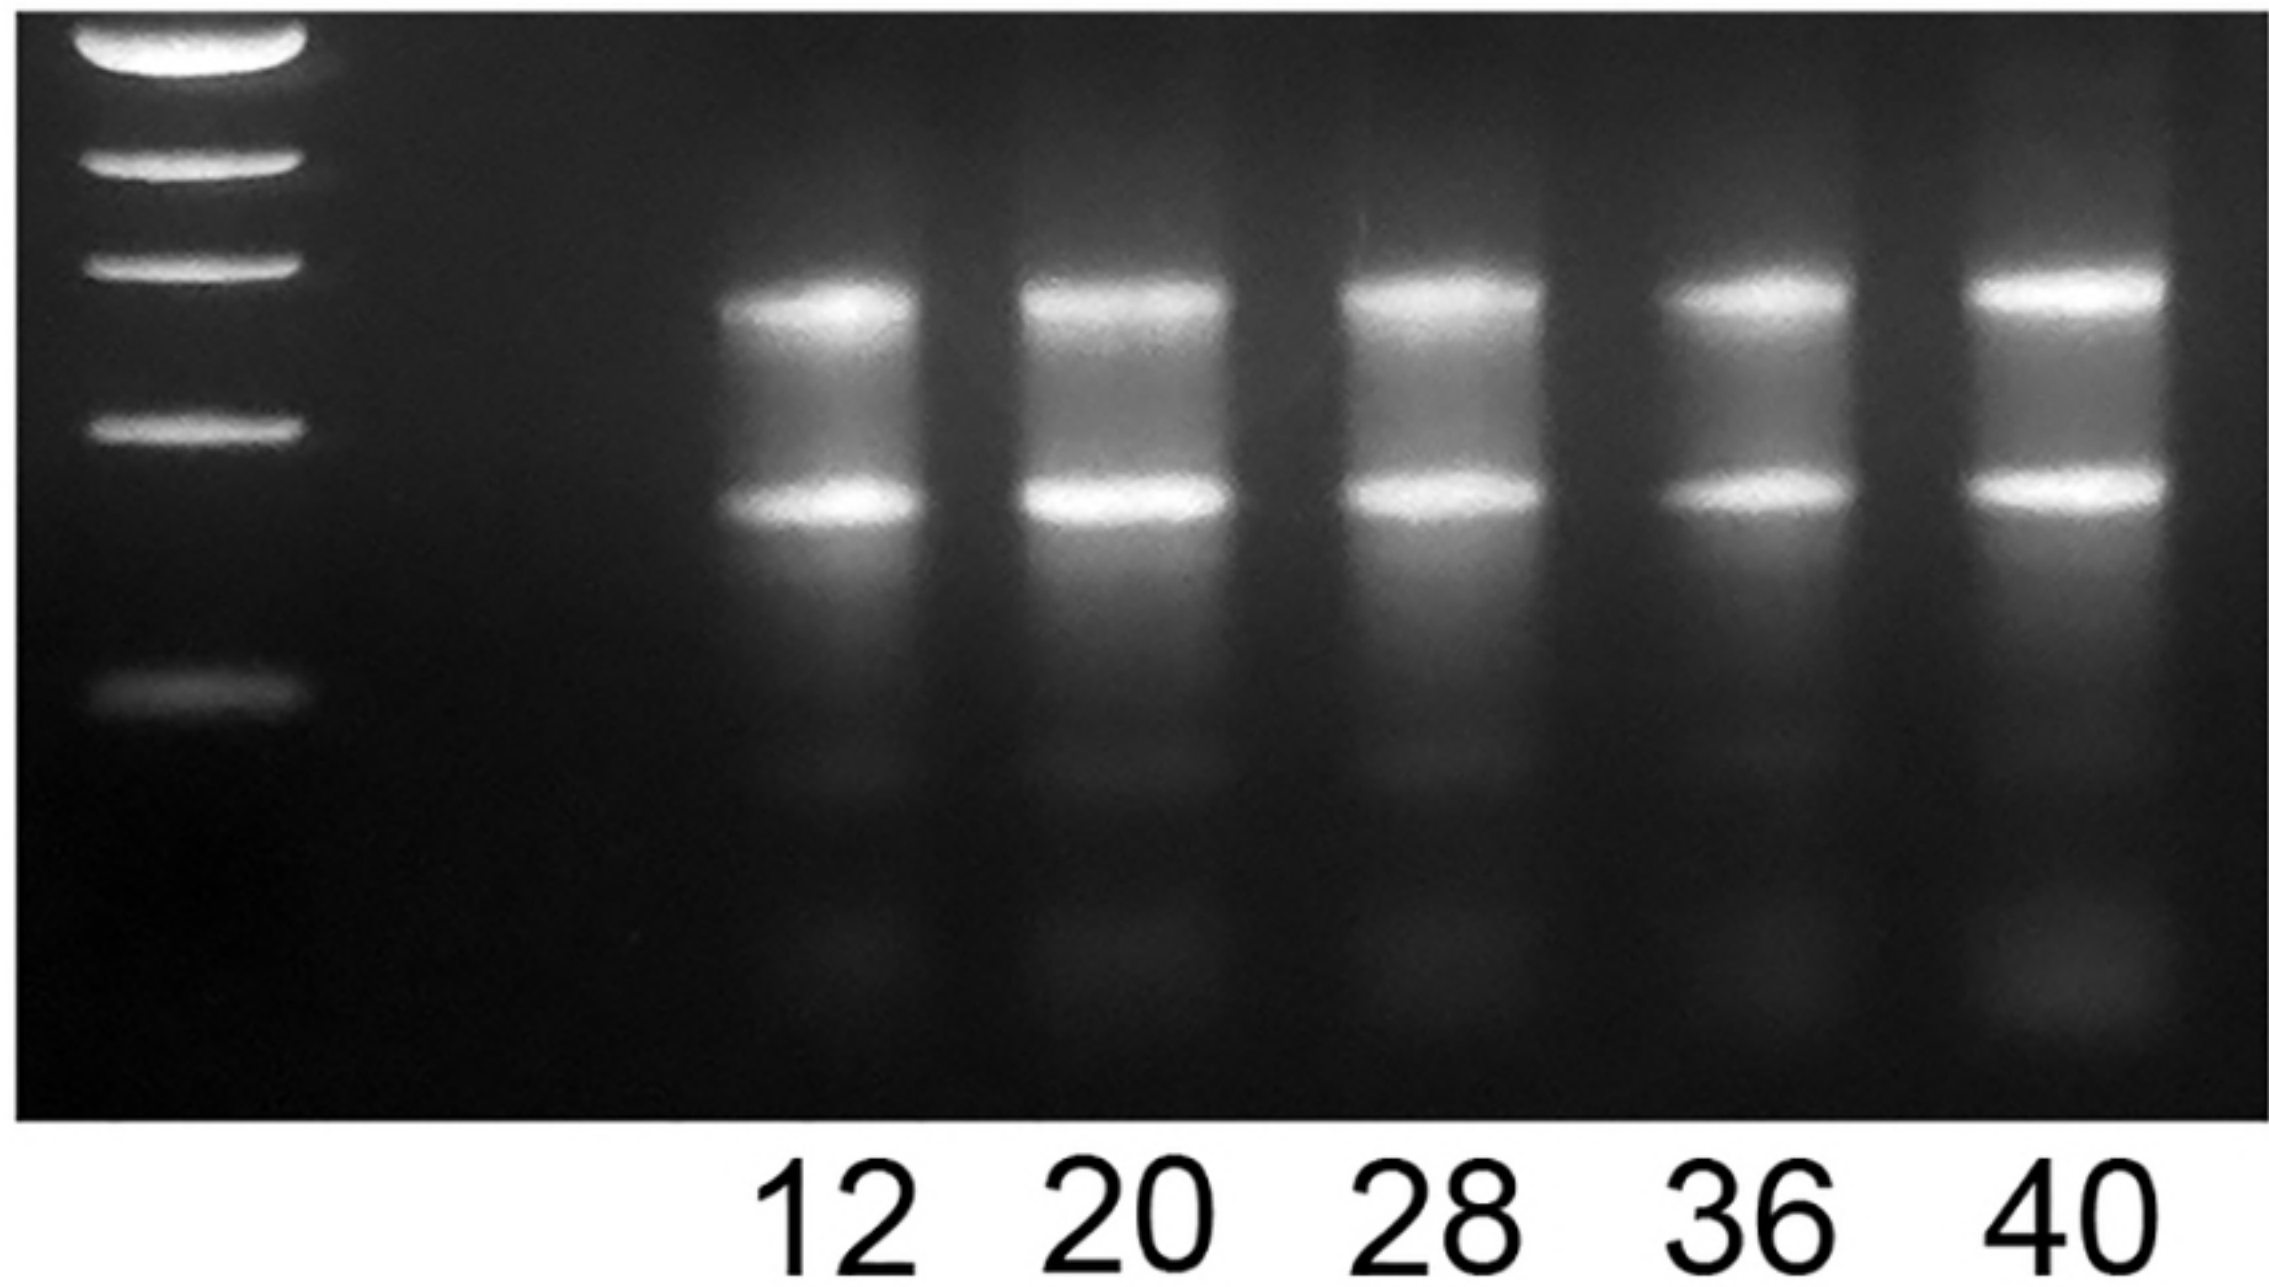

S1 Fig



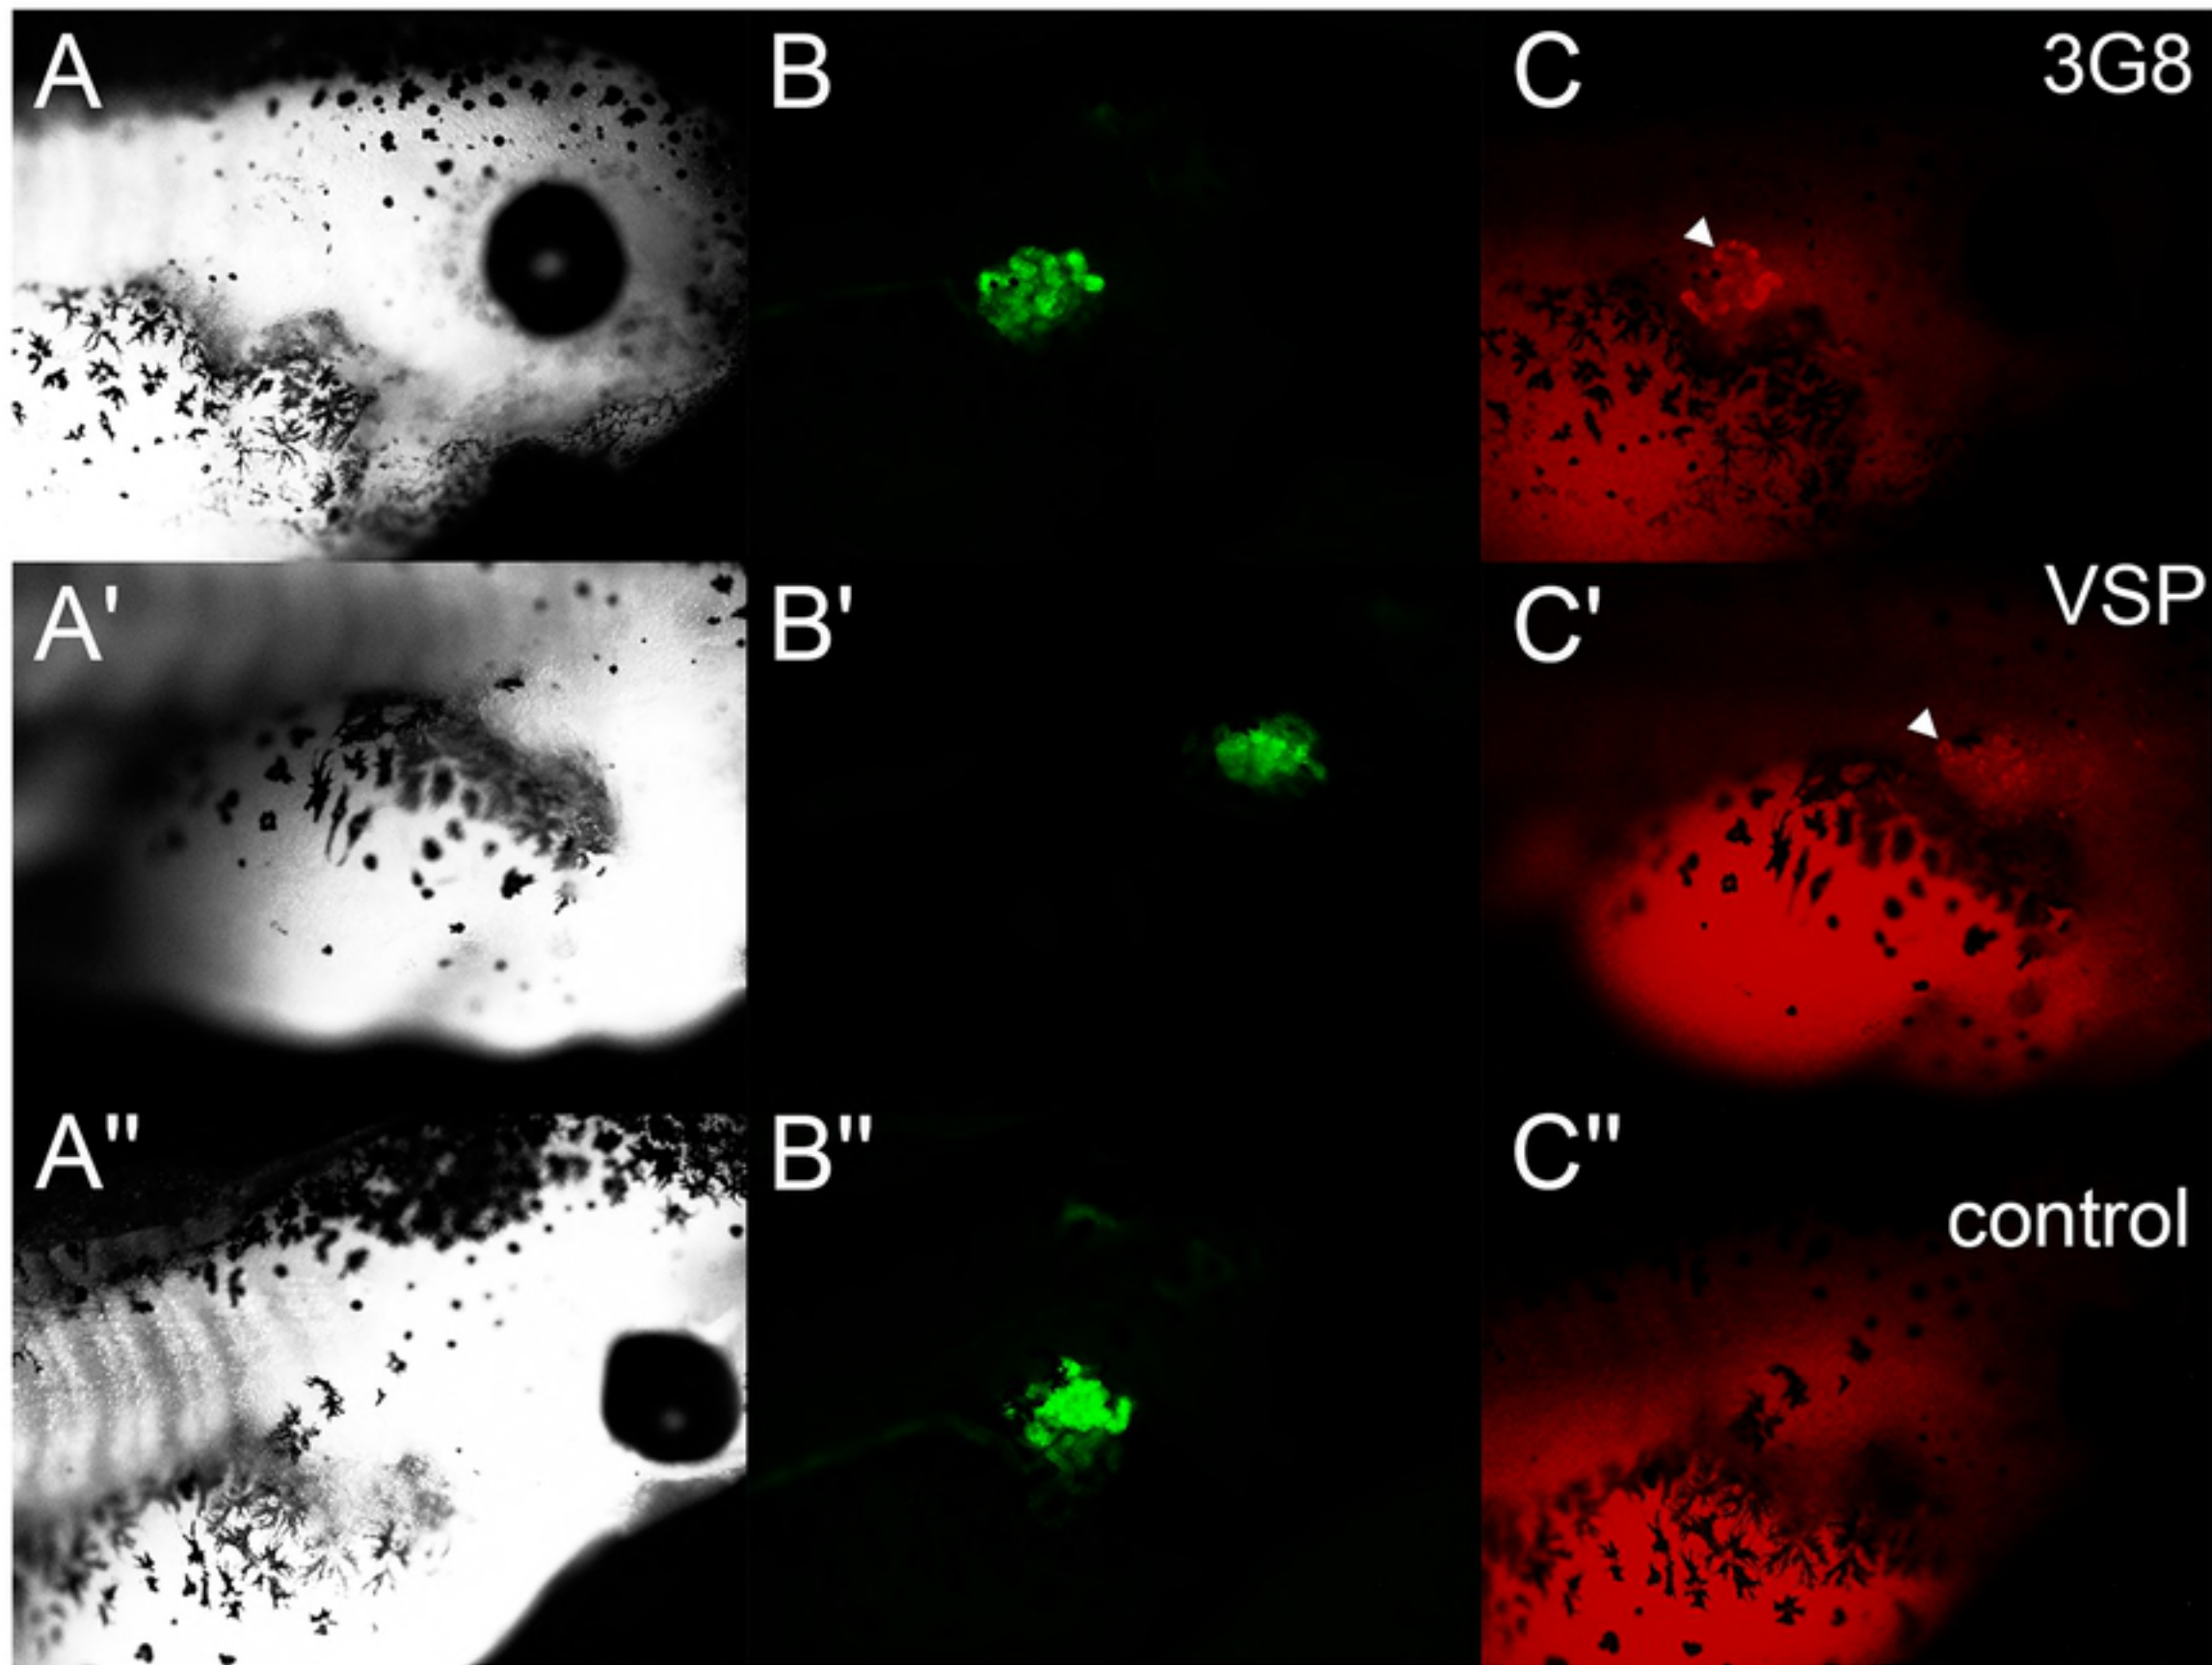

S2 Fig
